# Supplementary material
Source: publisher figshare collection journal article supplement (https://tandf.figshare.com/ndownloader/files/13449311)
Supplement: Supplementary file 1 [file 13449311]

Supporting Information

**CeCl3-catalyzed a highly efficient and eco-friendly synthesis of new and densely functionalized thiazolo[3,2-*a*]pyrimidins *via* Biginelli-type reaction**

Tayebeh Jazinizadeh a, Afshin Yazdani-Elah-Abadi b, Malek Taher Maghsoodlou a, *, Reza Heydari a

aDepartment of Chemistry, Faculty of Science, University of Sistan and Baluchestan, P. O. Box 98135-674, Zahedan, Iran

bDepartment of Biology, Science and Art University, Yazd, Iran

*Corresponding author; Tel: +985412416586; Fax: +985412416586; E-mail: [mt_maghsoodlou@yahoo.com](mailto:mt_maghsoodlou@yahoo.com), [mt_maghsoodlou@chem.usb.ac.ir](mailto:mt_maghsoodlou@chem.usb.ac.ir)

**Table of contents**

Experimental procedure…………………………………….……………………………… Page 2

Spectral data…………………………………………………………………………........ Page 3-6

Copies of FT-IR, 1H, 13C NMR and Mass spectra of compounds ..……………………. Page 7-36

**Experimental­**

***General***

Melting points and IR spectra of all compounds were determined by using an Electro thermal 9100 apparatus and JASCO FT/IR-460 plus spectrometer. The 1H NMR and 13C NMR spectra were recorded on a Bruker DRX-300 Avanve instrument with deuterated DMSO and CDCl3 as a solvent and using TMS as internal reference at 300 and 75 MHz, respectively. The mass spectra were recorded on a Shimadzu GCMS-QP5050A mass spectrometer operating at an ionization potential of 70 eV. Elemental analyses for C, H, and N were performed using a Heraeus CHN-O-Rapid analyzer at Iranian Central Research of Petroleum Company. Thin-layer chromatography (TLC) was performed on silica-gel Polygram SILG/UV 254 plates. All chemicals were provided by chemical producer Merck (Darmastadt, Germany) and Fluka (Buchs, Switzerland) and used without further purification.

***General procedure for synthesis of tetrahydropyrimidine-5-carboxamide derivatives (4):***

A mixture of acetoacetanilide (1 mmol, 0.177 g), appropriate aldehyde (1 mmol), thiourea (1.1 mmol, 0.084 g) and CeCl3 catalyst (10 mol %, 0.037 g) was heated in ethanol (10 mL) at 70 °C for one hour. The reaction progress was monitored by TLC. After completion of the reaction, the mixture was cooled to room temperature and then H2O (5 mL) was added. The solid product was filtered, washed with cold distilled water/EtOH (1:1) (2 × 2 mL) to obtain pure products in good to high yields.

***General procedure for synthesis of thiazolo[3,2-a]pyrimidin derivatives (6a-l):***

A solution of DMAD (0.001 mol, 0.140 g) or DEAD (0.001 mol, 0.172 g) in 2 mL ethanol was added to a solution of tetrahydropyrimidine derivatives (0.001 mol, 0.322g (**4a**)) in ethanol (10 mL) in small portions. The mixture was stirred at ambient temperature in 120 minutes. The resulting yellow precipitate was filtered and washed with cold ethanol. The product was obtained without purification as a yellow powder. The structure of all the new products was characterized by IR, 1H and 13C NMR spectra along with elemental analysis data. The mass spectra of these compounds displayed molecular ion peaks with the appropriate *m/z* values.

***Spectral and analytical data***

*Methyl 2-(7-methyl-3-oxo-5-phenyl-6-(phenylcarbamoyl)-3,5-dihydro-2H-thiazolo[3,2-a]pyrimidin-2-ylidene)acetate (****6a****):* Yellow powder; yield 0.372 g (86%), mp 248-250 °C; IR (KBr): *ν*max = 3287, 2925, 1718, 1694, 1645, 1581, 1516, 1442, 1377, 1333 cm–1; 1H NMR (300 MHz, DMSO-*d*6): *δ* 2.15 (s, 3H, CH3), 3.80 (s, 3H,CH3), 6.19 (s, 1H, C-H), 6.85 (s, 1H, C=CH), 7.04-7.09 (m, 1H, Ar-H), 7.27-7.39 (m,7H, Ar-H), 7.45 (d, *J* = 7.5, 2H, Ar-H), 10.03 (s, 1H, N-H) ppm; 13C NMR (300 MHz, DMSO-*d*6): 21.5, 53.2, 56.8, 116.4, 117.1, 120.3, 124.3, 127.5, 129.0, 129.1, 129.3, 138.9, 139.0, 139.8, 140.1, 152.9, 163.3, 164.9, 166.3 ppm; MS (EI, 70 eV) *m*/*z* (%): 433 (M+, 12), 401 (8), 341 (100), 155 (15), 128 (7), 77 (9); Anal. Calcd for C23H19N3O4S: C, 63.73; H, 4.42; N, 9.69; S, 7.40 %. Found: C, 63.98; H, 4.82; N, 9.36; S, 7.62 %.

*Ethyl 2-(7-methyl-3-oxo-5-phenyl-6-(phenylcarbamoyl)-3,5-dihydro-2H-thiazolo[3,2-a]pyrimidin-2-ylidene)acetate (****6b****):* Yellow powder; yield 0.380 g (85%), mp 236-238 °C; IR (KBr): *ν*max = 3346, 2986, 1722, 1691, 1640, 1573, 1518, 1320, 1207 cm–1; 1H NMR (300 MHz, CDCl3): *δ* 1.25 (t, *J* = 7.2, 3H, CH3), 2.33 (s, 3H,CH3), 4.21 (q, *J* = 7.2, 2H, CH2), 6.03 (s, 1H, C-H), 6.79 (s, 1H, C=CH ), 6.89 (s, 1H, N-H), 7.00-7.05 (m, 1H, Ar-H ), 7.10-7.30 (m , 9H, Ar-H) ppm; 13C NMR (300 MHz, DMSO-*d*6): 14.1, 21.5, 56.5, 62.0, 115.7, 118.2, 120.0, 124.9, 127.4, 129.0, 129.4, 137.0, 138.4,139.0, 139.5, 141.3, 154.2, 163.4, 164.7, 165.7 ppm; Anal. Calcd for C24H21N3O4S: C, 64.41; H, 4.73; N, 9.39; S, 7.17 %. Found: C, 64.72; H, 4.91; N, 9.52; S, 7.43 %.

*Methyl 2-(7-methyl-3-oxo-6-(phenylcarbamoyl)-5-(m-tolyl)-3,5-dihydro-2H-thiazolo[3,2-a]pyrimidin-2-ylidene)acetate (****6c****):* Yellow powder; yield 0.398 g (89%), mp 215-217 °C; IR (KBr): *ν*max = 3293, 3065, 2950, 1718, 1694, 1649,1581, 1336, 1311 cm–1; 1H NMR (300 MHz, CDCl3): *δ* 2.34 (s, 6H, CH3), 3.87 (s, 3H, CH3), 6.08 (s, 1H, C-H), 6.90 (s, 1H, C=CH), 7.11-7.19 (m, 5H, Ar-H, N-H), 7.25-7.31 (m, 5H, Ar-H) ppm; 13C NMR (300 MHz, DMSO-*d*6): 21.4, 21.5, 52.7, 56.5, 115.7, 117.5, 120.1, 124.4, 124.9, 127.9, 129.0, 129.2, 130.2, 137.0, 138.3, 139.2, 140.0, 141.3, 154.0, 163.3, 164.7, 166.2 ppm; MS (EI, 70 eV) *m*/*z* (%): 447 (M+, 13), 415 (11), 356 (24), 355 (100), 267 (3), 169 (20), 115 (4), 65 (9); Anal. Calcd for C24H21N3O4S: C, 64.41; H, 4.73; N, 9.39; S, 7.17 %. Found: C, 64.73; H, 5.04; N, 9.62; S, 7.31 %.

*Ethyl 2-(7-methyl-3-oxo-6-(phenylcarbamoyl)-5-(m-tolyl)-3,5-dihydro-2H-thiazolo[3,2-a]pyrimidin-2-ylidene)acetate (****6d****):* Yellow powder; yield 0.392 g (85%), mp 220-221 °C; IR (KBr): *ν*max = 3430, 2926, 1723, 1690, 1641, 1579, 1519, 1321, 1201 cm–1; 1H NMR (300 MHz, CDCl3): *δ* 1.36 (t, *J* = 7.2, 3H, CH3), 2.34 (s, 3H,CH3), 2.35 (s, 3H,CH3), 4.33 (q, *J* = 7.2, 2H, CH2), 6.09 (s, 1H, C-H), 6.90 (s, 1H, C=CH), 6.98 (s, 1H, N-H), 7.11-7.20 (m, 4H, Ar-H), 7.26-7.32 (m, 5H, Ar-H) ppm; 13C NMR (300 MHz, DMSO-*d*6): 14.1, 21.4, 21.5, 56.5, 62.0, 115.6, 118.1, 120.1, 124.4, 124.9, 127.9, 129.0, 129.3, 130.2, 137.0, 138.4, 139.3, 139.6, 141.4, 154.2, 163.4, 164.7, 165.7 ppm; MS (EI, 70 eV) *m*/*z* (%): 461 (M+, 8), 415 (12), 369 (100), 279 (18), 149 (68), 145 (33), 57 (23); Anal. Calcd for C25H23N3O4S: C, 65.06; H, 5.02; N, 9.10; S, 6.95 %. Found: C, 65.40; H, 5.21; N, 9.37; S, 7.21 %.

*Methyl 2-(7-methyl-3-oxo-6-(phenylcarbamoyl)-5-(p-tolyl)-3,5-dihydro-2H-thiazolo[3,2-a]pyrimidin-2-ylidene)acetate (****6e****):* Yellow powder; yield 0.367 g (82%), mp 204-206 °C;IR (KBr): *ν*max = 3290, 3084, 2952, 1714, 1692, 1654,1581, 1333, 1315 cm–1; 1H NMR (300 MHz, CDCl3): *δ* 2.35 (s, 6H, CH3), 3.87 (s, 3H,CH3), 6.10 (s, 1H, C-H), 6.90 (s, 1H, C=CH), 7.05 (s, 1H, N-H), 7.10-7.20 (m, 3H, Ar-H), 7.28-7.35(m, 6H, Ar-H) ppm; 13C NMR (300 MHz, DMSO-*d*6): 21.2, 21.5, 52.7, 56.3, 115.6, 117.5, 120.0, 124.8, 127.4, 129.0, 130.0, 135.3, 137.1, 139.4, 140.1, 141.6, 153.9, 163.3, 164.7 ppm; MS (EI, 70 eV) *m*/*z* (%): 447 (M+, 13), 415 (8), 355 (100), 267 (3), 169 (17), 115 (5), 65 (9); Anal. Calcd for C24H21N3O4S: C, 64.41; H, 4.73; N, 9.39; S, 7.17 %. Found: C, 64.85; H, 5.01; N, 9.12; S, 6.89 %.

*Ethyl 2-(7-methyl-3-oxo-6-(phenylcarbamoyl)-5-(p-tolyl)-3,5-dihydro-2H-thiazolo[3,2-a]pyrimidin-2-ylidene)acetate (****6f****):* Yellow powder; yield 0.406 g (88%), mp 200-202 °C;IR (KBr): *ν*max = 3395, 2924, 1721, 1694, 1650, 1574, 1523, 1337, 1216 cm–1; 1H NMR (300 MHz, CDCl3): *δ* 1.35 (t, *J* = 7.2, 3H, CH3), 2.34 (s, 6H,CH3), 4.32 (q, *J* = 7.2, 2H, CH2), 6.10 (s, 1H, C-H), 6.88 (s, 1H, C=CH), 7.10-7.20 (m, 4H, Ar-H), 7.28-7.35 (m, 6H, Ar-H, N-H) ppm; 13C NMR (300 MHz, DMSO-*d*6): 14.1, 21.2, 21.5, 56.2, 62.0, 115.6, 118.1, 120.1, 124.8, 127.4, 129.0, 130.0, 137.1, 139.4, 139.7, 141.6, 154.0, 163.4, 164.8, 165.7 ppm; Anal. Calcd for C25H23N3O4S: C, 65.06; H, 5.02; N, 9.10; S, 6.95 %. Found: C, 65.32; H, 4.76; N, 9.35; S, 7.18 %.

*Methyl 2-(5-(4-chlorophenyl)-7-methyl-3-oxo-6-(phenylcarbamoyl)-3,5-dihydro-2H-thiazolo[3,2-a]pyrimidin-2-ylidene)acetate (****6g****):* Yellow powder; yield 0.420 g (90%), mp 231-233 °C; IR (KBr): *ν*max = 3288, 2923, 2863, 1718, 1695, 1647, 1582, 1333, 1214 cm–1; 1H NMR (300 MHz, DMSO-*d*6): *δ* 2.15 ( s, 3H, CH3), 3.80 (s, 3H,CH3), 6.18 (s, 1H, C-H), 6.85 (s, 1H, C=CH), 7.07 (t, *J* = 7.2, 1H, Ar-H), 7.30-7.35 (m, 4H, Ar-H), 7.43 (d, *J* = 9, 2H, Ar-H), 7.53 (d, *J* = 7.5, 2H), 10.04 (s, 1H, N-H) ppm; 13C NMR (300 MHz, DMSO-*d*6): 21.6, 53.2, 56.2, 115.9, 117.1, 120.3, 124.3, 129.1, 129.2, 129.7, 133.7, 137.8, 138.8, 140.0, 140.0, 152.9, 163.3, 164.8, 166.3 ppm; MS (EI, 70 eV) *m*/*z* (%): 467 (M+, 13), 375 (100), 377 (39), 189 (9), 128 (4), 67 (11), 65(9); Anal. Calcd for C23H18ClN3O4S: C, 59.04; H, 3.88; N, 8.98; S, 6.85 %. Found: C, 58.82; H, 4.15; N, 9.27; S, 6.96 %.

*Ethyl 2-(5-(4-chlorophenyl)-7-methyl-3-oxo-6-(phenylcarbamoyl)-3,5-dihydro-2H-thiazolo[3,2-a]pyrimidin-2-ylidene)acetate (****6h****):* Yellow powder; yield 0.418 g (87%), mp 240-243 °C;IR (KBr): *ν*max = 3320, 2965, 1721, 1697, 1651, 1581, 1518, 1450, 1347, 1231 cm–1; 1H NMR (300 MHz, DMSO-*d*6): *δ* 1.27 (t, *J* = 6.9, 3H, CH3), 2.14 (s, 3H,CH3), 4.26 (q, *J* = 6.9, 2H, CH2), 6.17 (s, 1H, C-H), 6.81 (s, 1H, C=CH), 7.05-7.09 (m, 1H, Ar-H), 7.27-7.54 (m, 8H, Ar-H), 10.04 (s, 1H, N-H) ppm; 13C NMR (300 MHz, DMSO-*d*6): 14.1, 21.2, 21.5, 56.2, 115.9, 117.4, 120.3, 124.4, 129.1, 129.2, 129.7, 137.8, 138.8, 139.9, 140.0, 153.0, 163.3, 164.8, 165.8 ppm; MS (EI, 70 eV) *m*/*z* (%): 481 (M+, 8), 421 (6), 391 (40), 389 (100), 324 (3), 261 (3), 189 (6), 163 (6), 67 (7); Anal. Calcd for C24H20ClN3O4S: C, 59.81; H, 4.18; N, 8.72; S, 6.65 %. Found: C, 60.12; H, 4.45; N, 9.07; S, 6.86 %.

*Methyl 2-(5-(4-methoxyphenyl)-7-methyl-3-oxo-6-(phenylcarbamoyl)-3,5-dihydro-2H-thiazolo[3,2-a]pyrimidin-2-ylidene)acetate (****6i****):* Yellow powder; yield 0.370 g (80%), mp 192-194 °C;IR (KBr): *ν*max = 3326, 2993, 1718, 1693, 1644, 1570, 1514, 1327, 1209 cm–1; 1H NMR (300 MHz, CDCl3): *δ* 2.35 (s, 3H, CH3), 3.80 (s, 3H,CH3), 3.87(s, 3H,CH3), 6.08 (s, 1H, C-H), 6.88-6.91 (m, 3H, C=CH, N-H, Ar-H), 7.10-7.14 (m, 2H, Ar-H), 7.27-7.36 (m, 6H, Ar-H) ppm; 13C NMR (300 MHz, DMSO-*d*6): 21.5, 52.7, 55.3, 55.9, 114.7, 115.5, 117.5, 120.0, 124.8, 129.0, 129.0, 130.2, 137.1, 140.1, 141.8, 153.9, 160.3, 163.4, 164.7, 166.2 ppm; MS (EI, 70 eV) *m*/*z* (%): 463 (M+, 13), 431 (8), 371 (100), 343 (8), 185 (14), 159 (7), 65(7); Anal. Calcd for C24H21N3O5S: C, 62.19; H, 4.57; N, 9.07; S, 6.92 %. Found: C, 62.48; H, 4.40; N, 9.41; S, 7.21 %.

*Ethyl 2-(5-(4-methoxyphenyl)-7-methyl-3-oxo-6-(phenylcarbamoyl)-3,5-dihydro-2H-thiazolo[3,2-a]pyrimidin-2-ylidene)acetate (****6j****):* Yellow powder; yield 0.405 g (85%), mp 210-212 °C; IR (KBr): *ν*max = 3311, 2930, 1733, 1693, 1641, 1569, 1318, 1198 cm–1; 1H NMR (300 MHz, CDCl3): *δ* 1.35 (t, *J* = 7.2, 3H, CH3), 2.35 (s, 3H,CH3), 3.80 (s, 3H,CH3), 4.31 (q, *J* = 7.2, 2H, CH2), 6.07 (s, 1H, C-H), 6.90 (d, *J* = 7.8, 3H, C=C-H), 7.09-7.15 (m, 2H, Ar-H), 7.26-7.35 (m, 6H, Ar-H, N-H) ppm; 13C NMR (300 MHz, DMSO-*d*6): 14.1, 21.5, 55.3, 55.9, 62.0, 114.7, 115.5, 118.1, 120.0, 124.8, 129.0, 130.3, 137.1, 139.7, 141.9, 154.0, 160.3, 163.4, 164.7, 165.7 ppm; MS (EI, 70 eV) *m*/*z* (%): 477 (M+, 10), 385 (100), 357 (9), 185 (6), 159 (5), 65(3); Anal. Calcd for C25H23N3O5S: C, 62.88; H, 4.85; N, 8.80; S, 6.71 %. Found: C, 63.11; H, 5.14; N, 9.23; S, 6.91 %.

*Methyl 2-(5-(4-bromophenyl)-7-methyl-3-oxo-6-(phenylcarbamoyl)-3,5-dihydro-2H-thiazolo[3,2-a]pyrimidin-2-ylidene)acetate (****6k****):* Yellow powder; yield 0.467 g (91%), mp 224-226 °C; IR (KBr): *ν*max = 3271, 2923, 2852, 1719, 1697, 1645, 1588, 1333, 1209 cm–1; 1H NMR (300 MHz, DMSO-*d*6): *δ* 2.14 (s, 3H, CH3), 3.81 (s, 3H,CH3), 6.16 (s, 1H, C-H), 6.85 (s, 1H, C=CH), 7.07 (t, *J* = 9, 1H, Ar-H), 7.24-7.32 (m, 4H, Ar-H), 7.52-7.58 (m, 4H, Ar-H), 10.04 (s, 1H, N-H) ppm; 13C NMR (300 MHz, DMSO-*d*6): 21.6, 53.2, 56.3, 115.8, 117.1, 120.3, 122.3, 124.3, 129.1, 129.9, 132.2, 138.2, 138.8, 140.0, 140.0, 153.0, 163.3, 164.8, 166.3 ppm; MS (EI, 70 eV) *m*/*z* (%): 513 (M+, 16), 481 (6), 421 (94), 419 (100), 235 (8), 209 (7), 65 (16); Anal. Calcd for C23H18N3O4S: C, 53.91; H, 3.54; N, 8.20; S, 6.26 %. Found: C, 54.34; H, 3.86; N, 8.57; S, 6.43 %.

*Methyl 2-(7-methyl-3-oxo-6-(phenylcarbamoyl)-5-(3,4,5-trimethoxyphenyl)-3,5-dihydro-2H-thiazolo[3,2-a]pyrimidin-2-ylidene)acetate (****6l****):* Yellow powder; yield 0.460 g (88%), mp 197-198 °C; IR (KBr): *ν*max = 3423, 2997, 1717, 1694, 1651, 1574, 1521, 1330, 1217 cm–1; 1H NMR (300 MHz, DMSO-*d*6): *δ* 2.31 (s, 3H, CH3), 3.79 (s, 6H, CH3), 3.82 (s, 3H, CH3), 3.87 (s, 3H, CH3), 6.07 (s, 1H, C-H), 6.55 (s, 2H, Ar-H), 6.93 (s, 1H, N-H), 7.13 (t , *J* = 7.2, 1H, Ar-H), 7.21 (s, 1H, Ar-H), 7.27-7.37 (m, 4H, Ar-H) ppm; 13C NMR (300 MHz, DMSO-*d*6): 21.4, 52.8, 56.2, 56.5, 60.7, 104.0, 115.5, 117.7, 120.1, 125.0, 129.1, 133.9, 137.0, 138.6, 139.9, 141.4, 153.9, 154.0, 163.3, 164.8, 166.2 ppm; MS (EI, 70 eV) *m*/*z* (%): 523 (M+, 34), 491 (40), 431 (100), 403 (10), 356 (7), 245 (45), 65 (8); Anal. Calcd for C26H25N3O7S: C, 59.65; H, 4.81; N, 8.03; S, 6.12 %. Found: C, 59.93; H, 4.67; N, 7.88; S, 6.53 %.


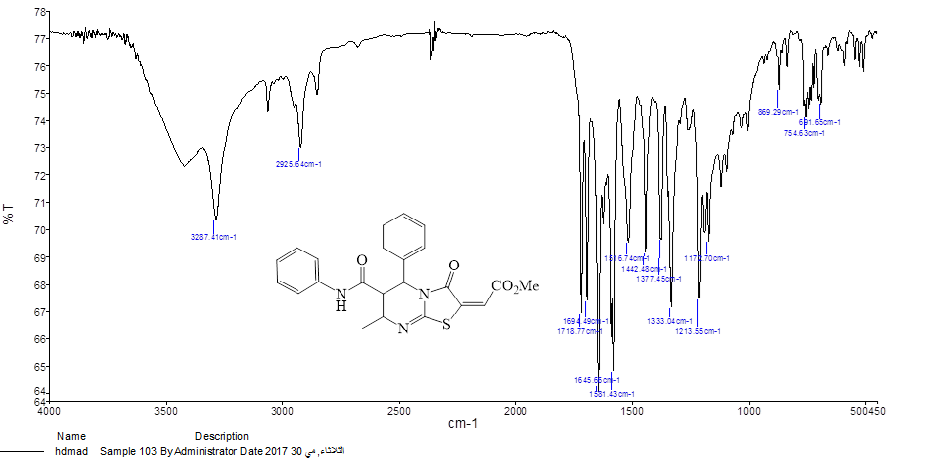


**FT-IR spectra of compound 6a**


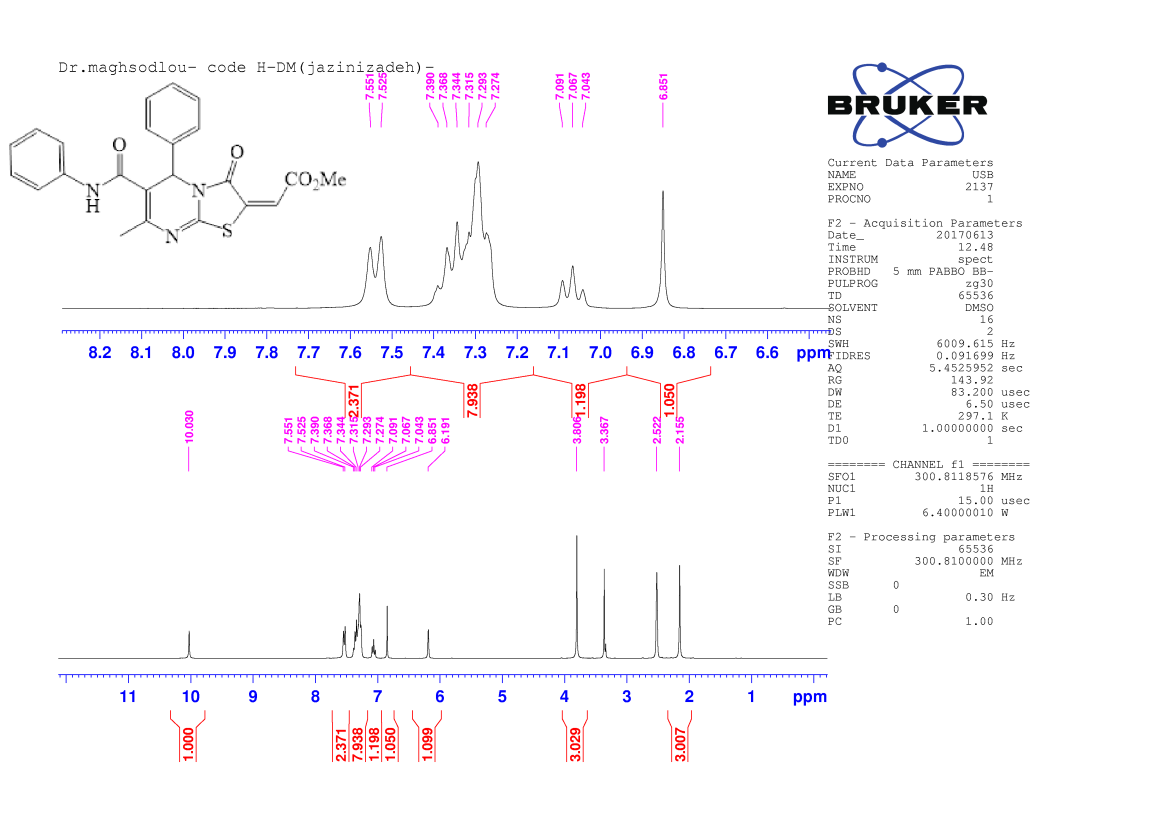


**1H NMR spectra of compound 6a**


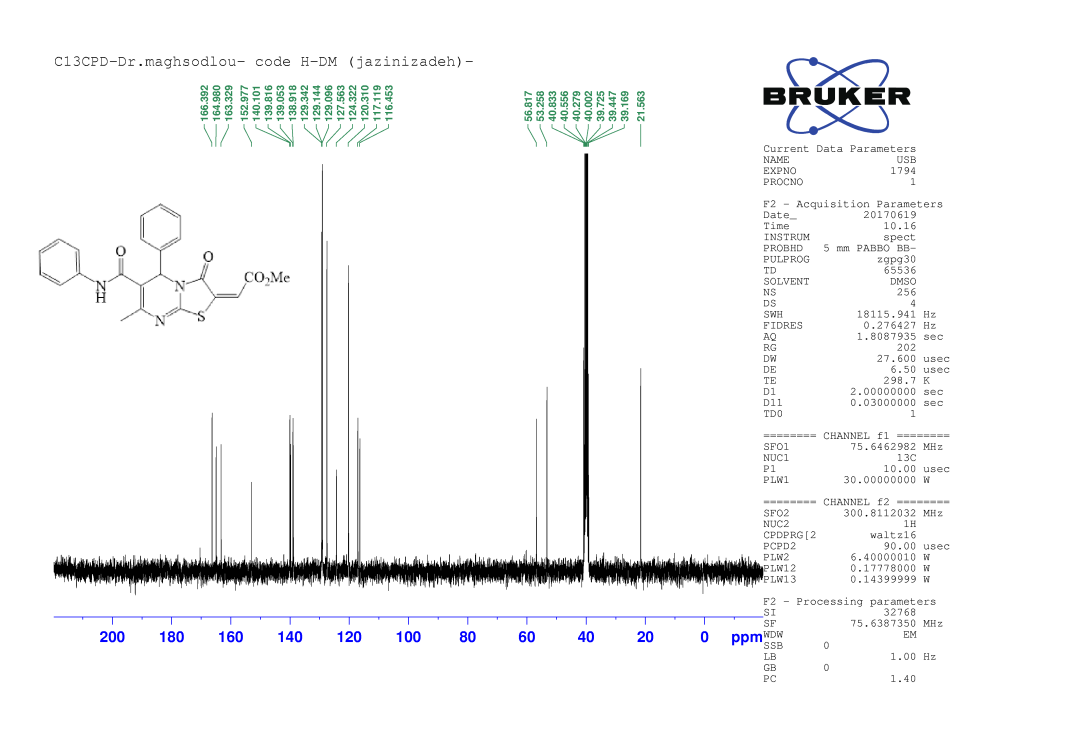


**13C NMR spectra of compound 6a**


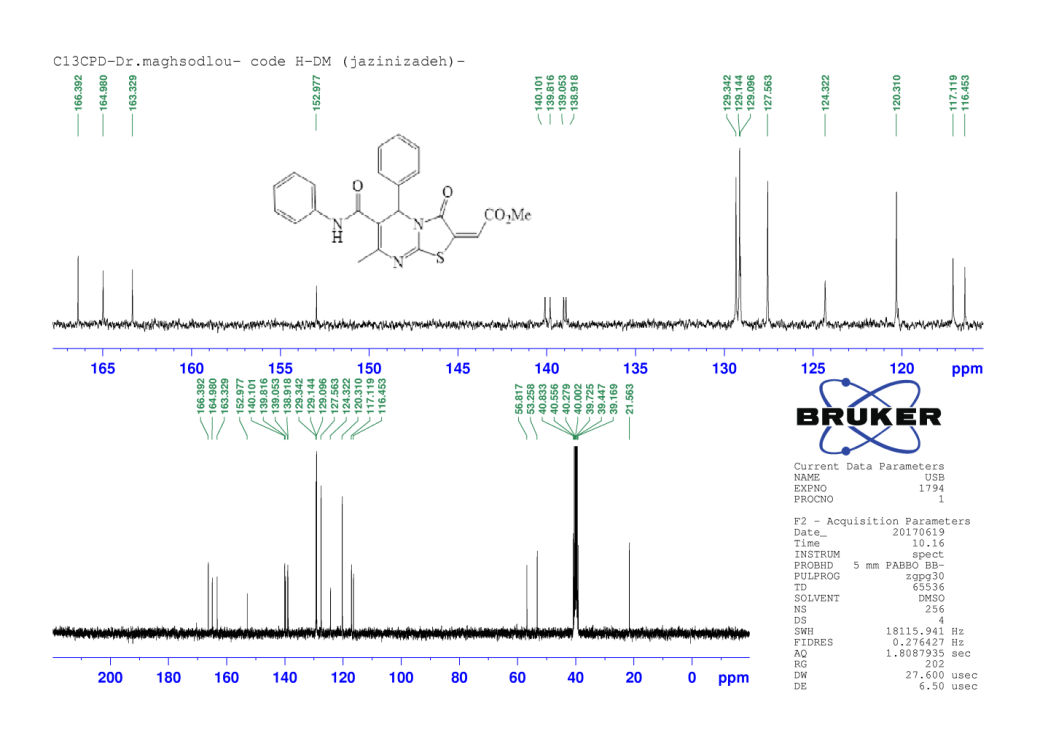


**Expanded 13C NMR spectra of compound 6a**


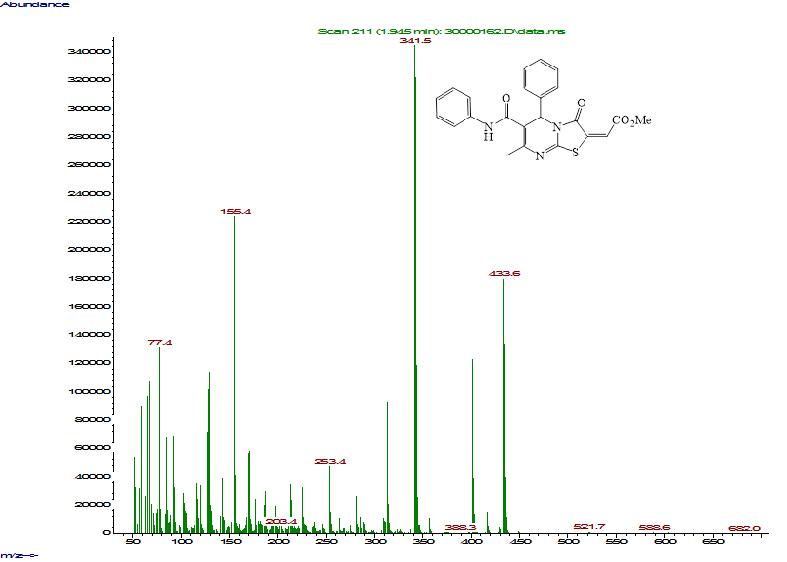


**Mass spectra of compound 6a**


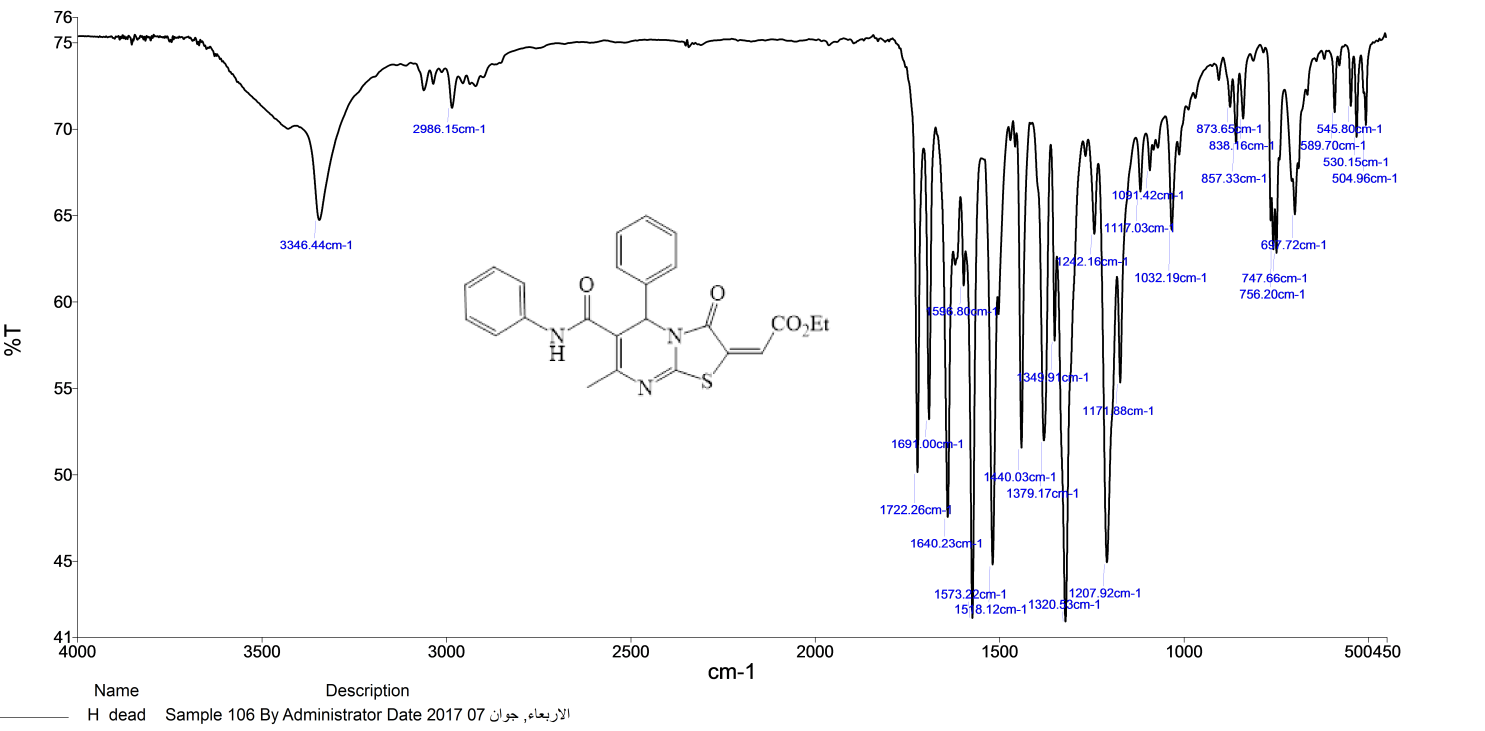


**FT-IR spectra of compound 6b**


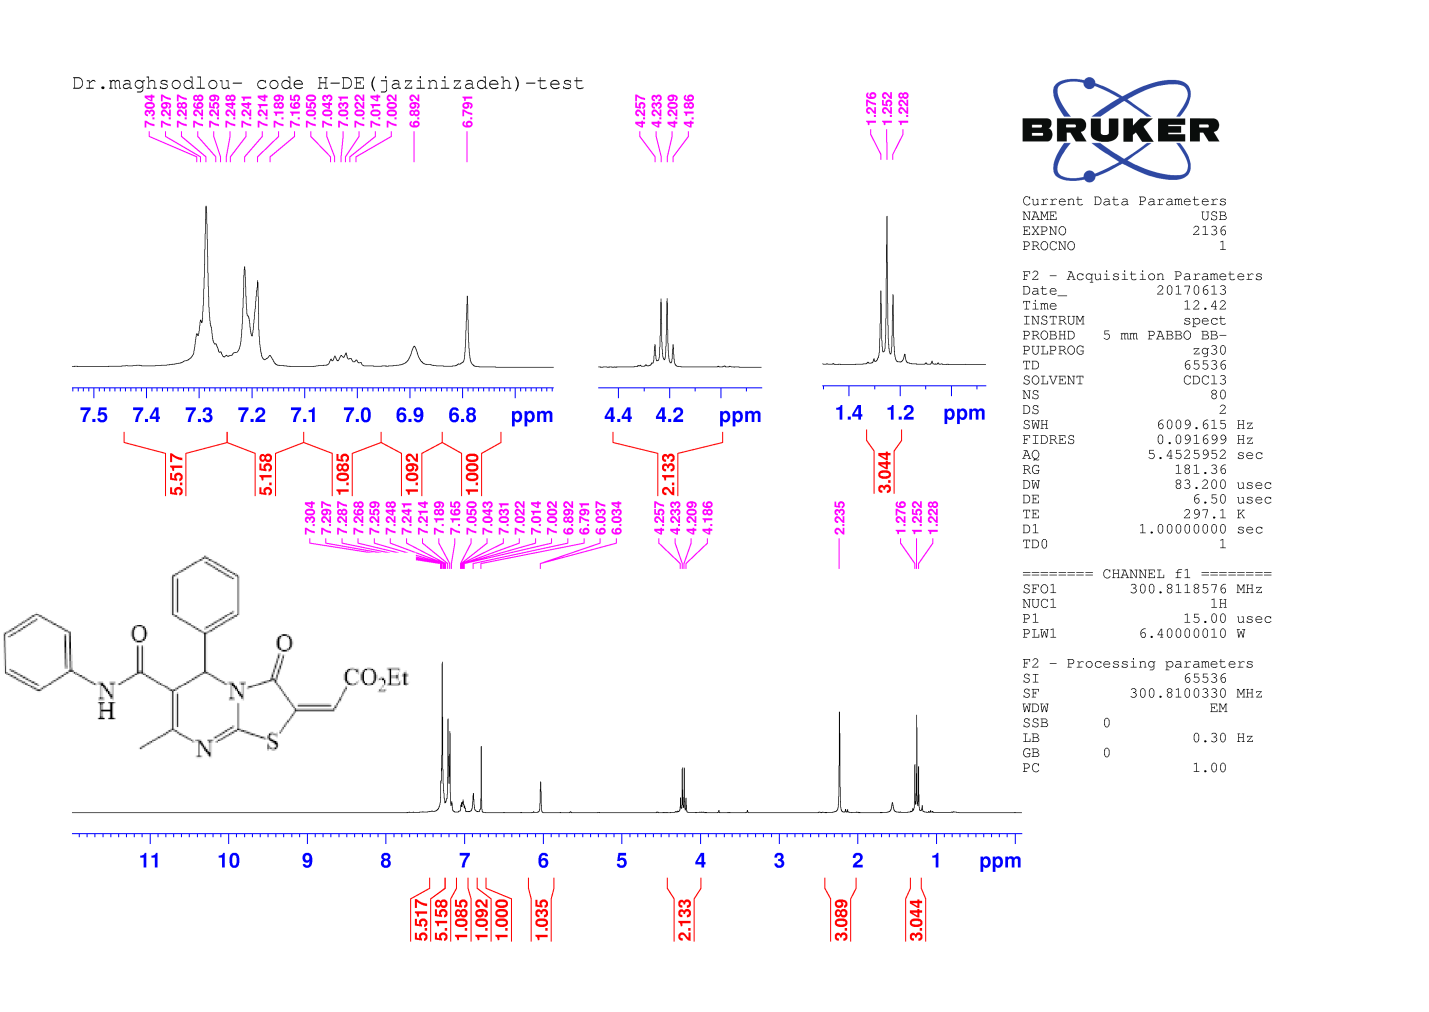


**1H NMR spectra of compound 6b**


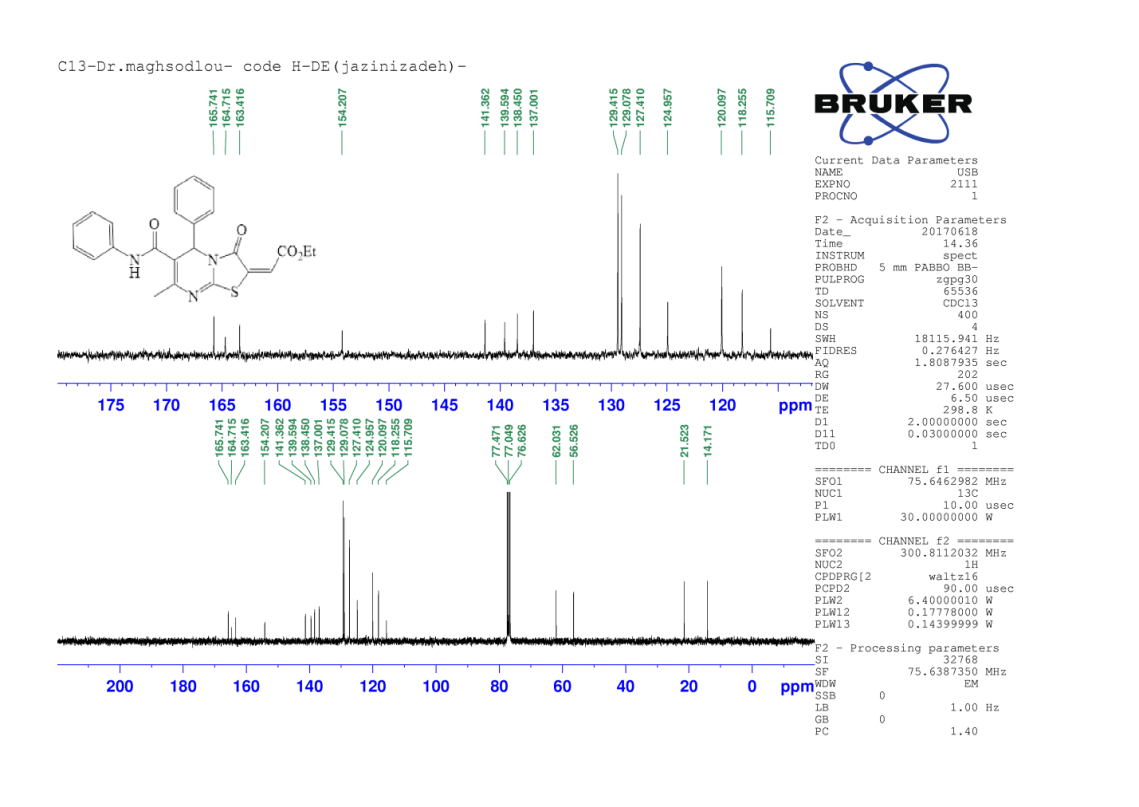


**Expanded****13C NMR spectra of compound 6b**


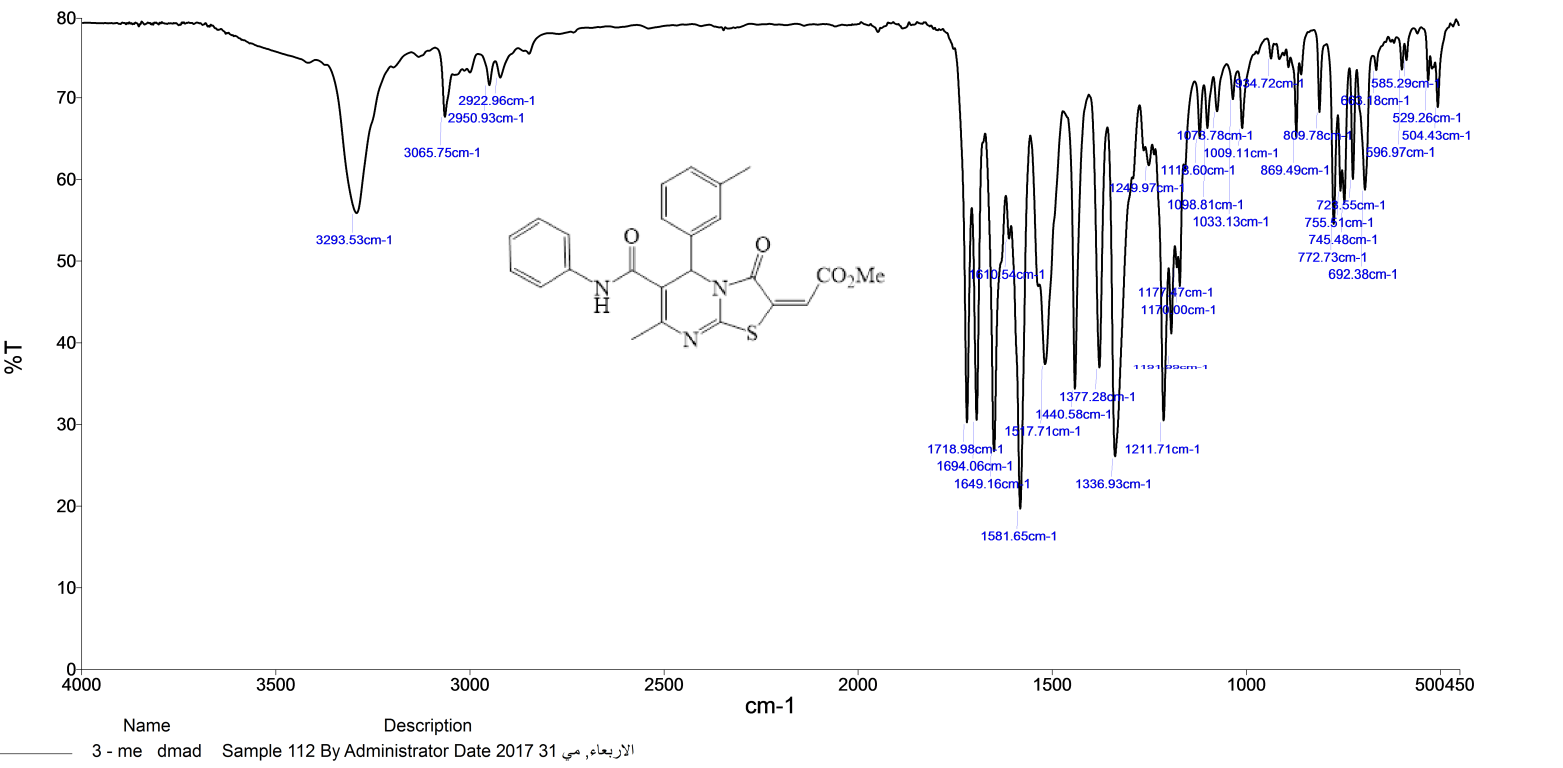


**FT-IR spectra of compound 6c**


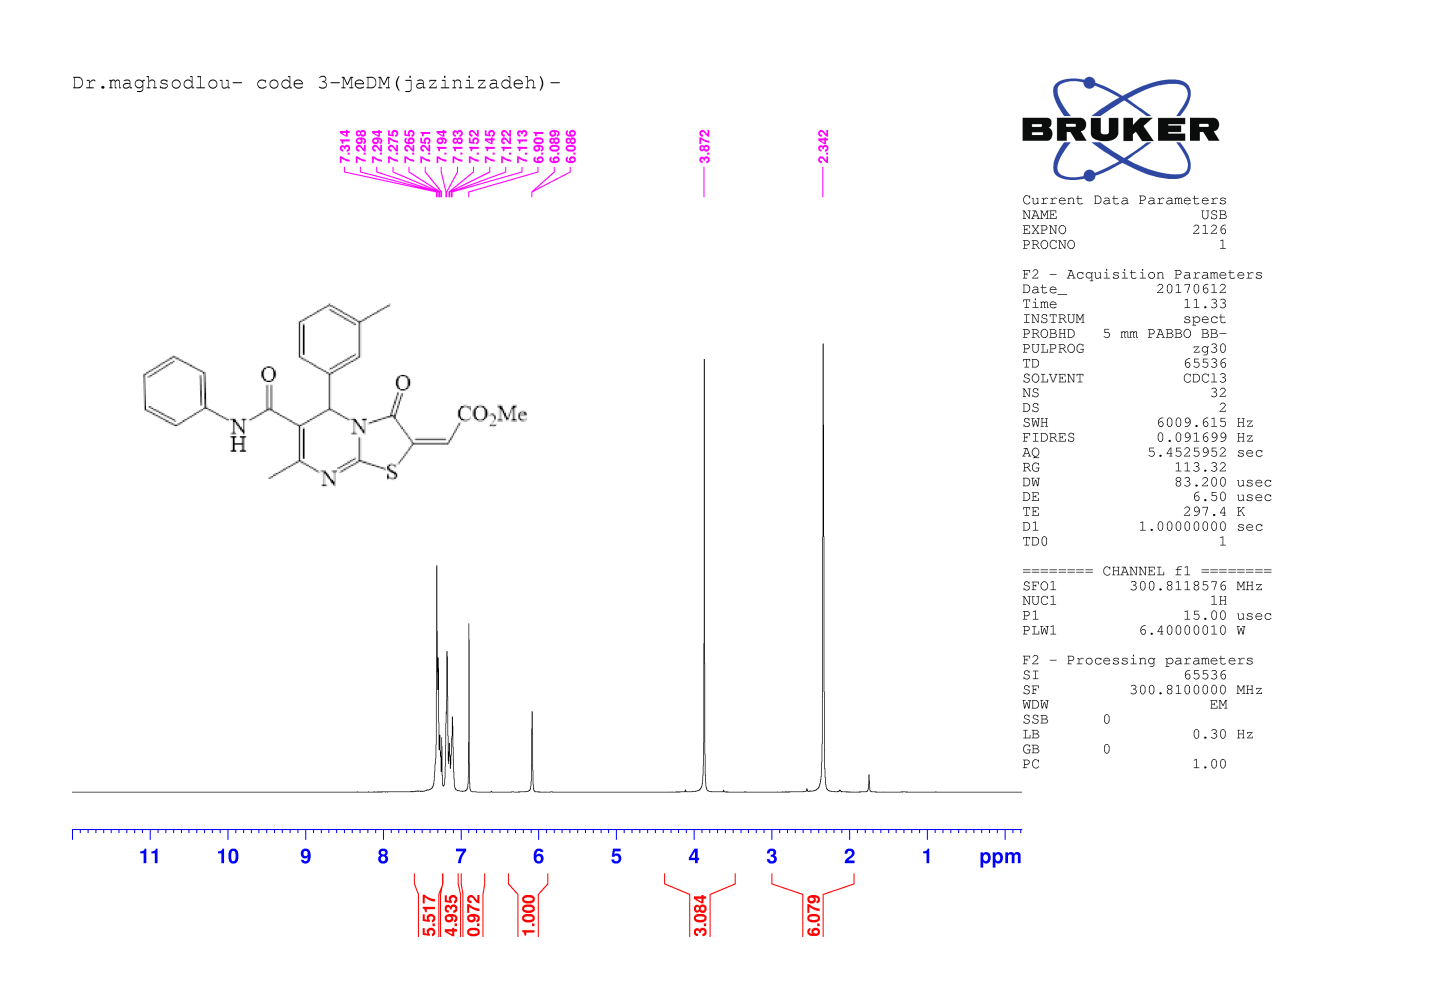


**1H NMR spectra of compound 6c**


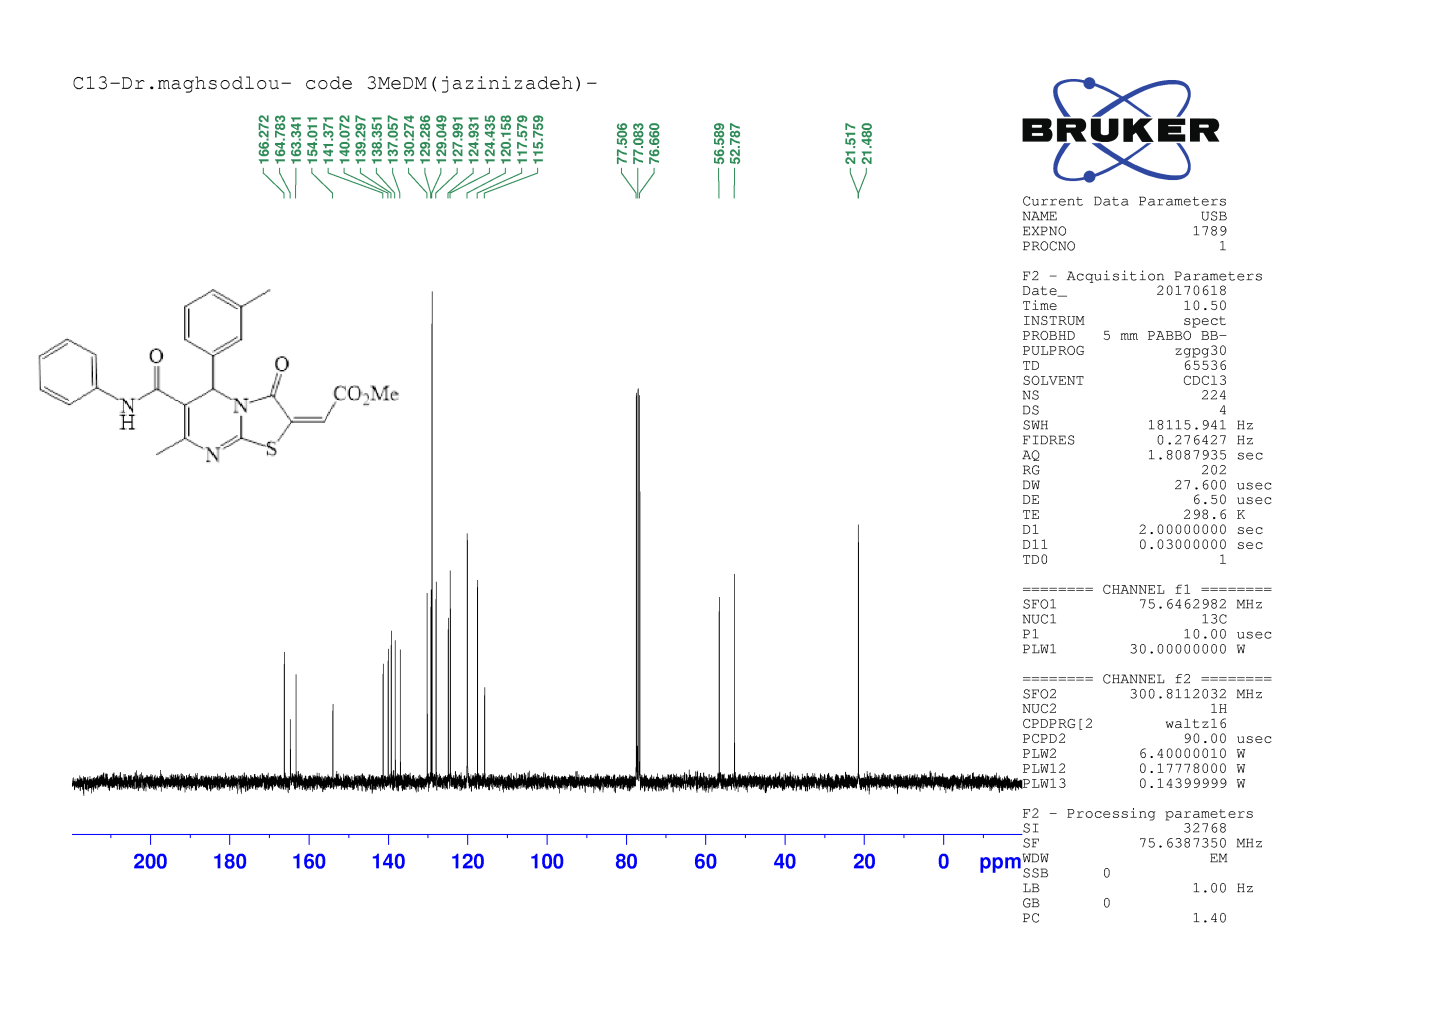


**13C NMR spectra of compound 6c**


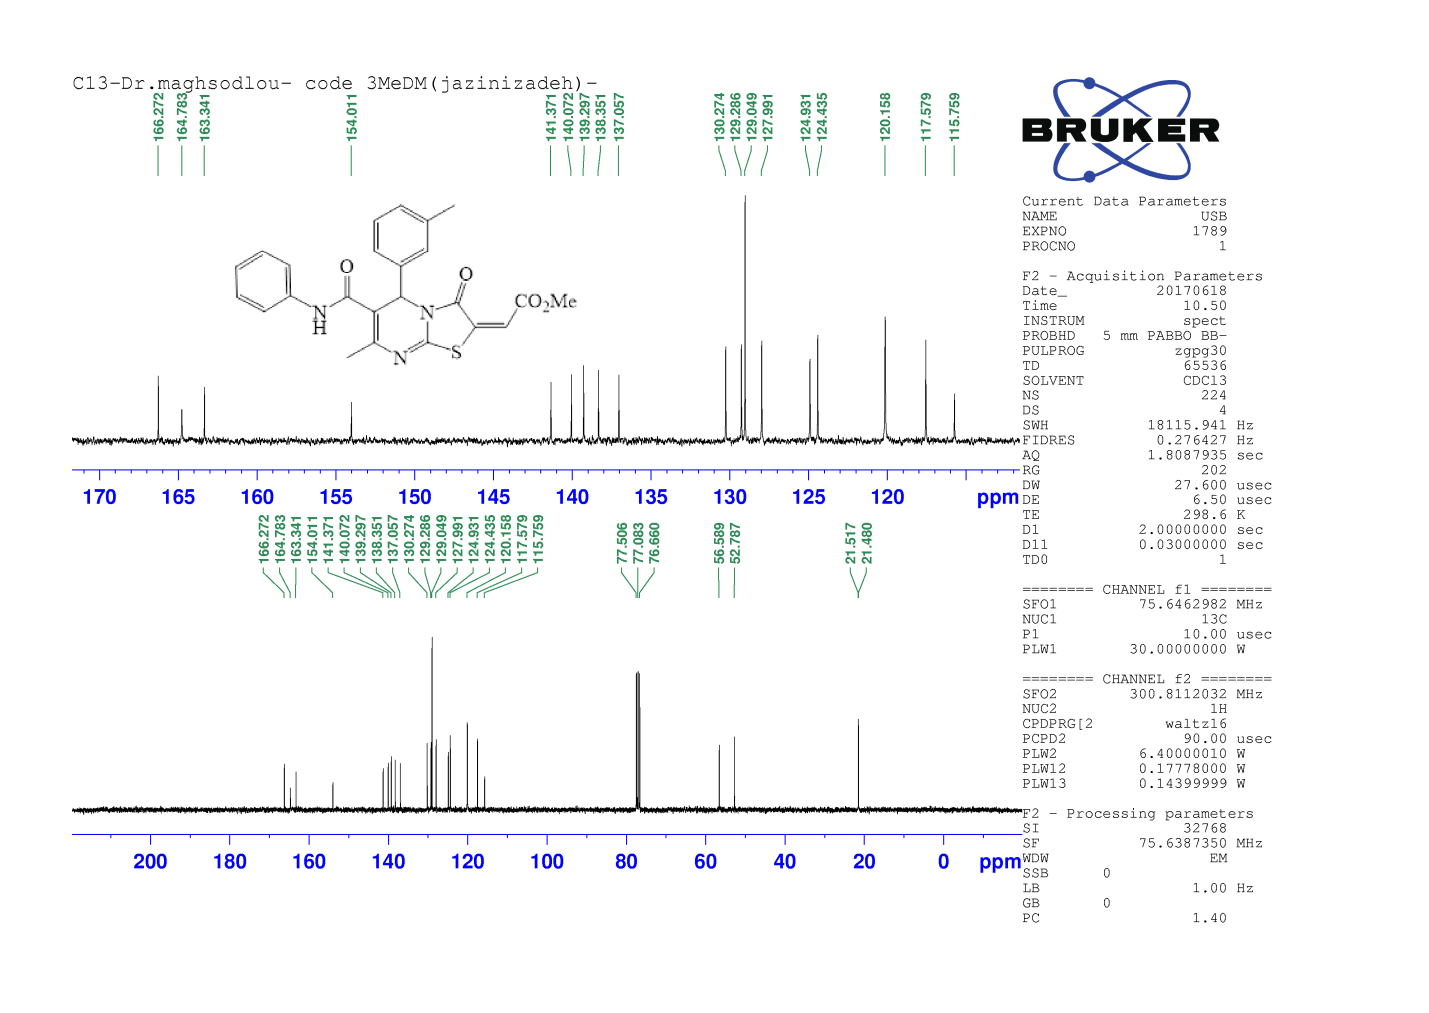


**Expanded****13C NMR spectra of compound 6c**


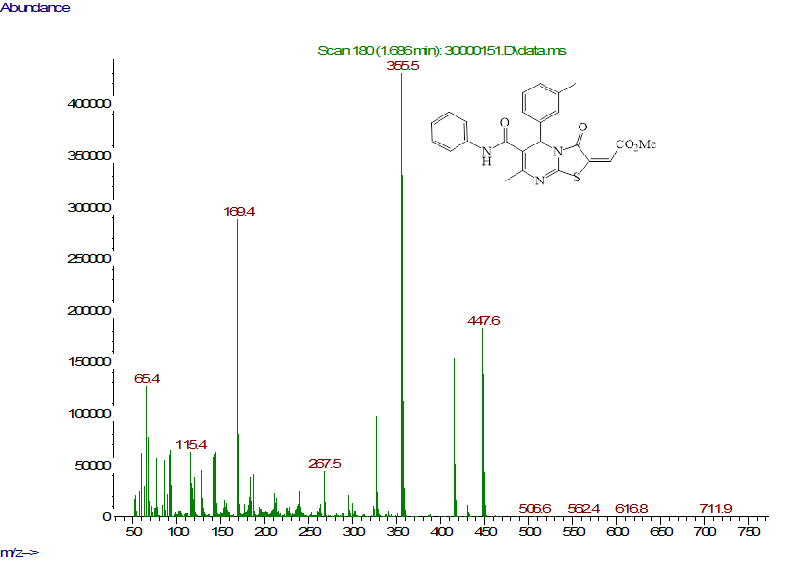


**Mass spectra of compound 6c**


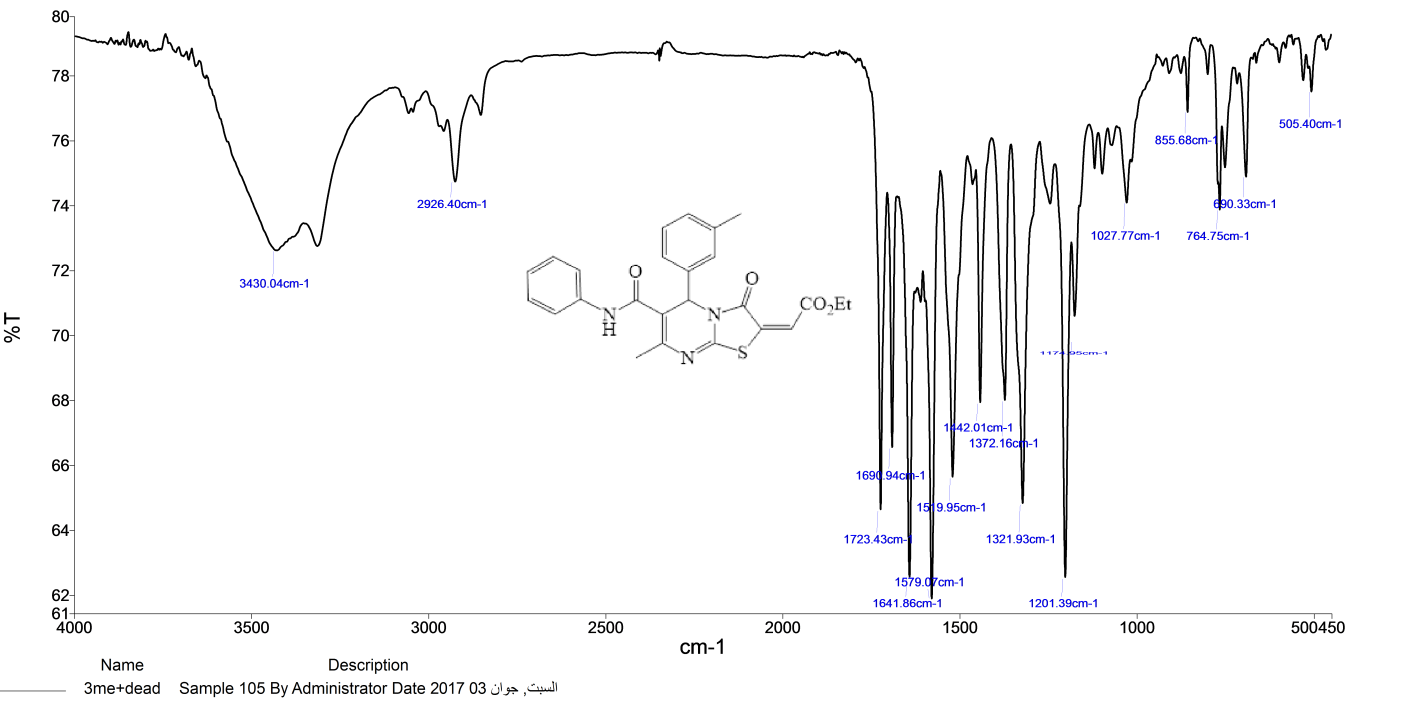
 **FT-IR spectra of compound 6d**


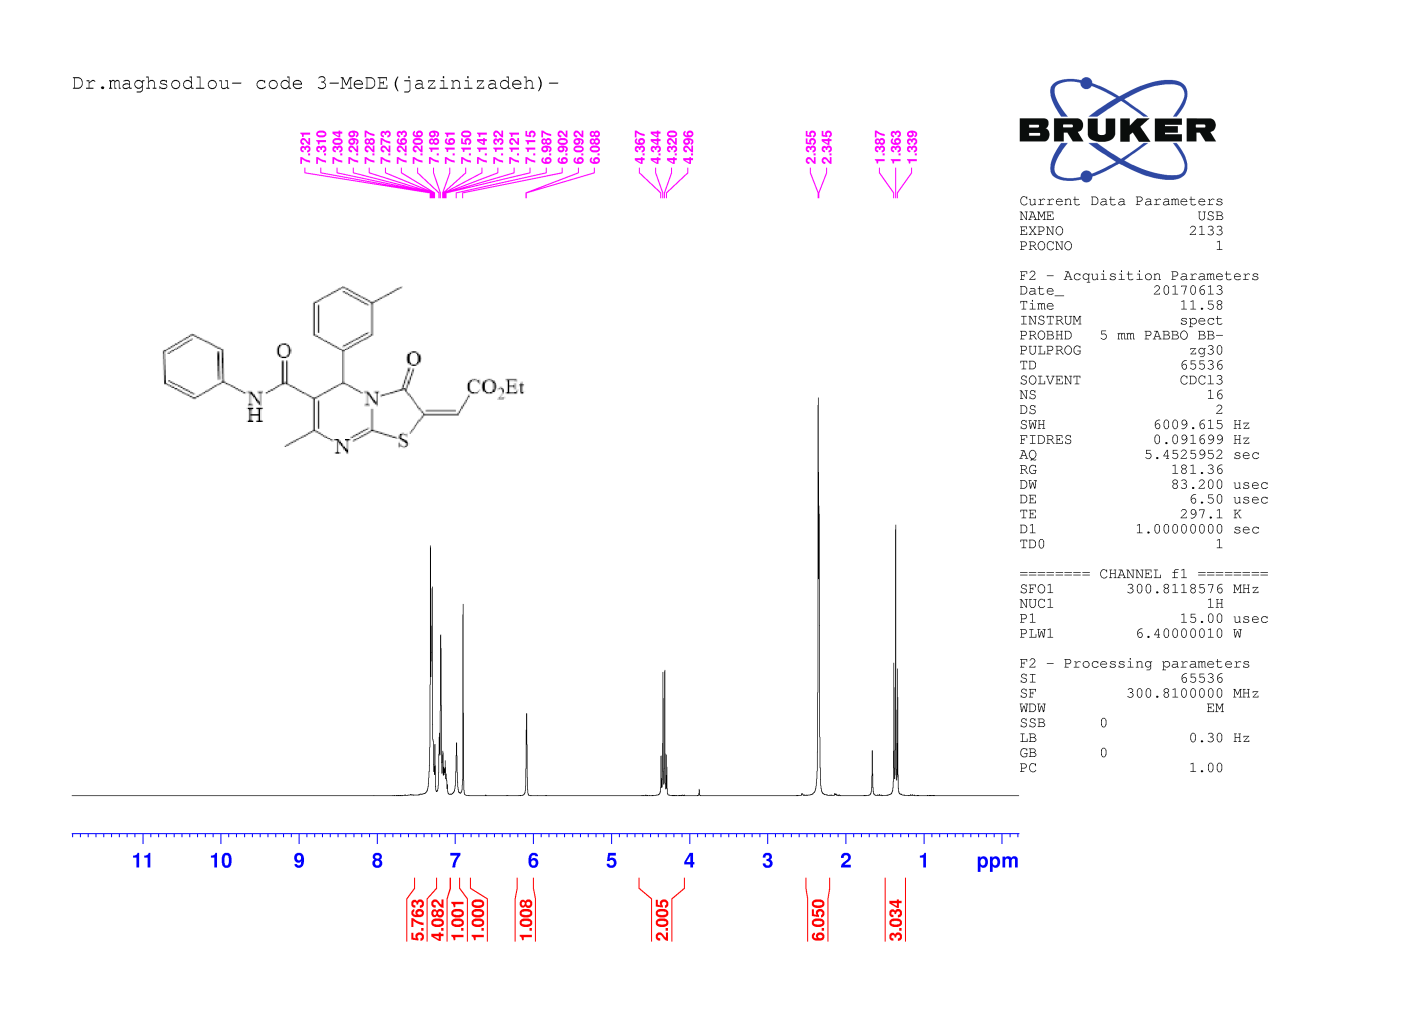


**1H NMR spectra of compound 6d**


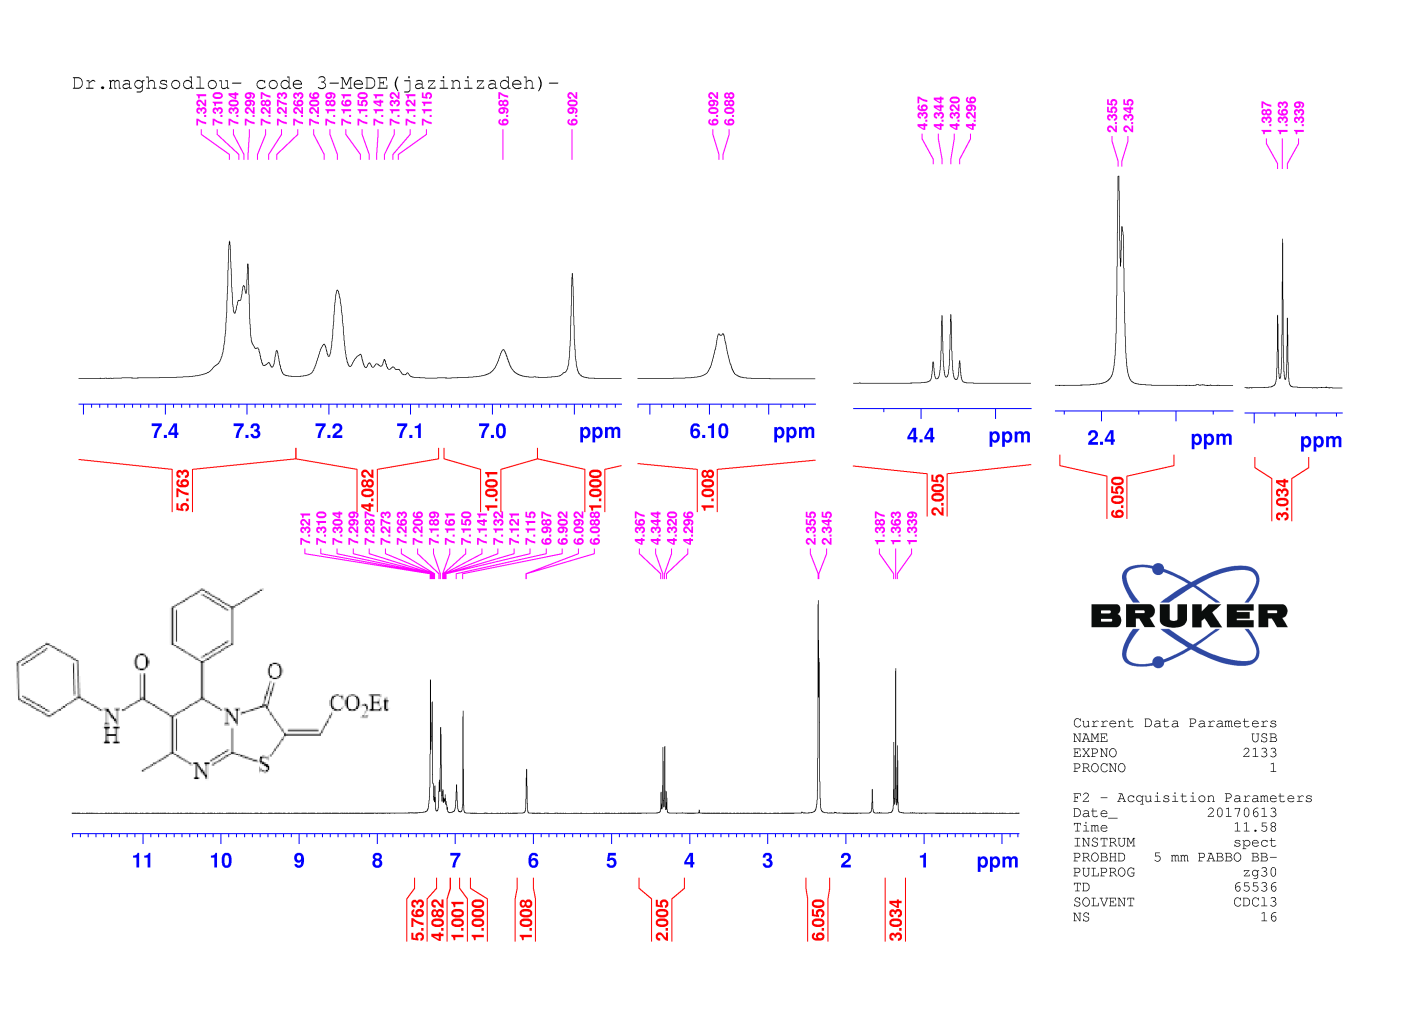


**1H NMR spectra of compound 6d**


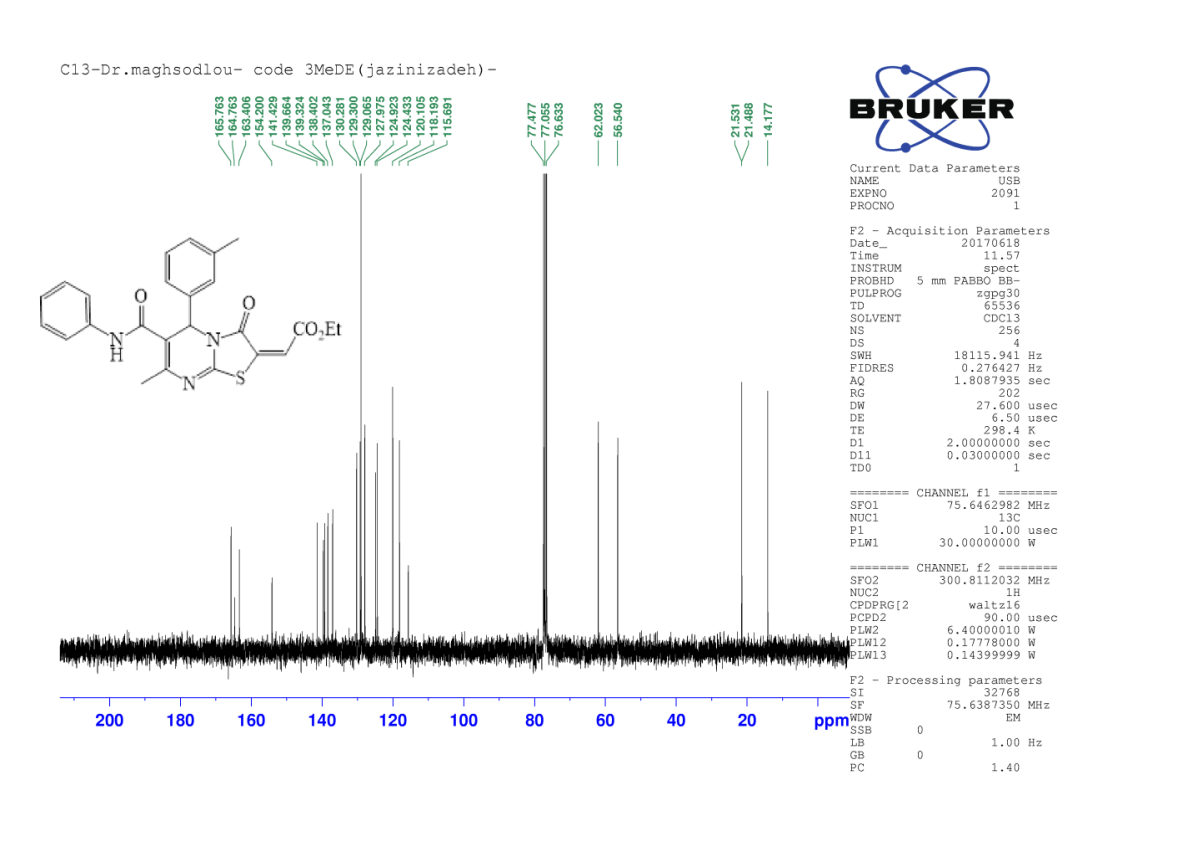


**13C NMR spectra of compound 6d**


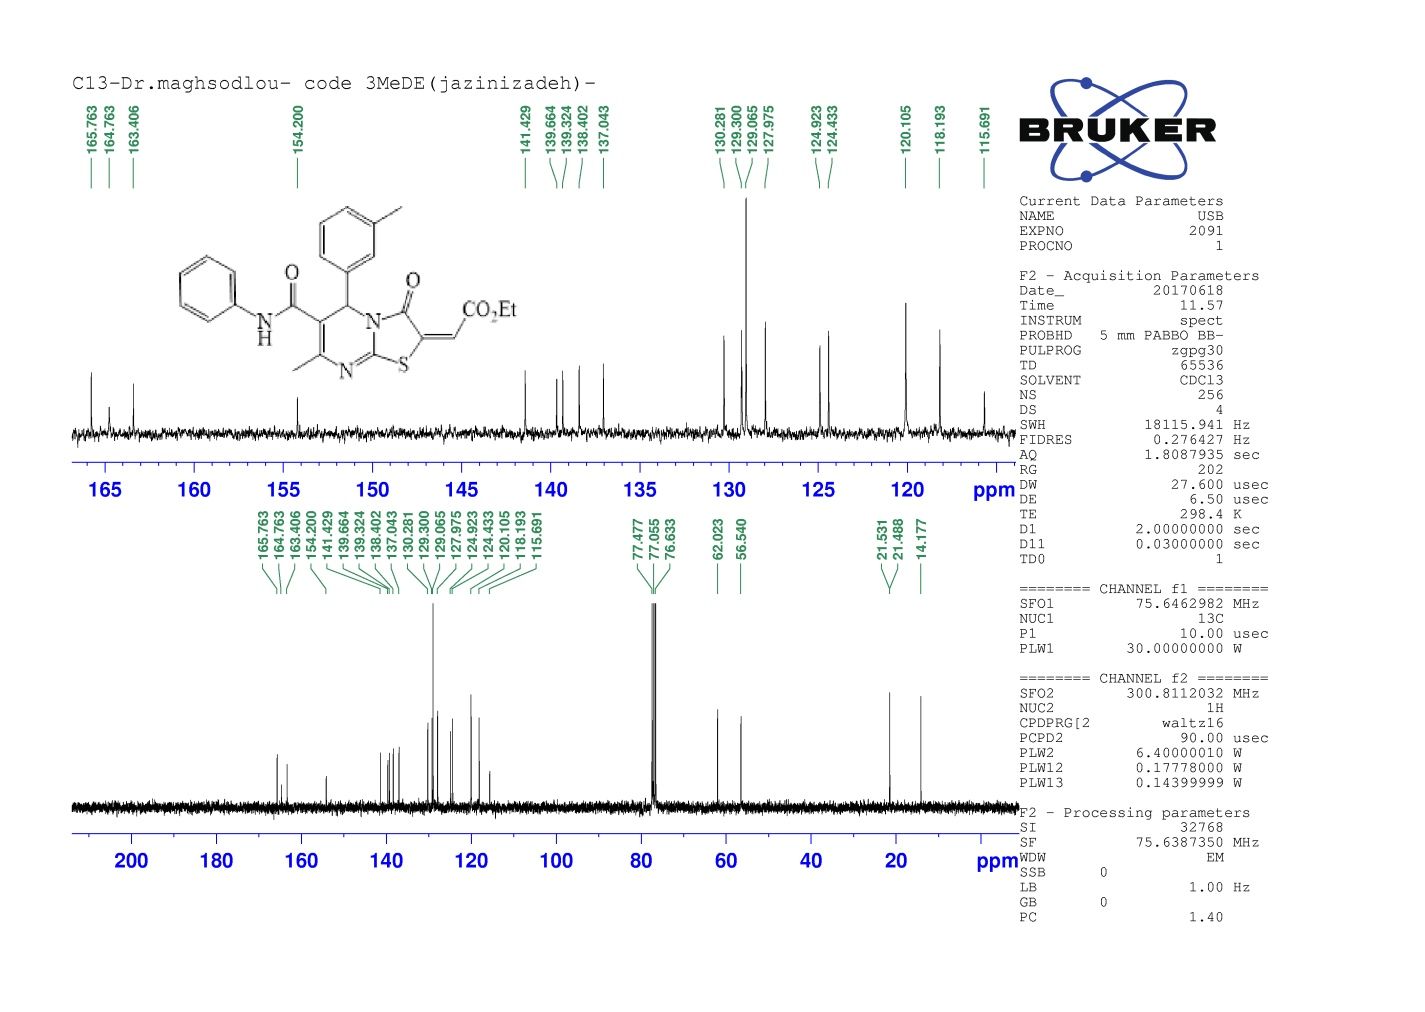


**Expanded****13C NMR spectra of compound 6d**


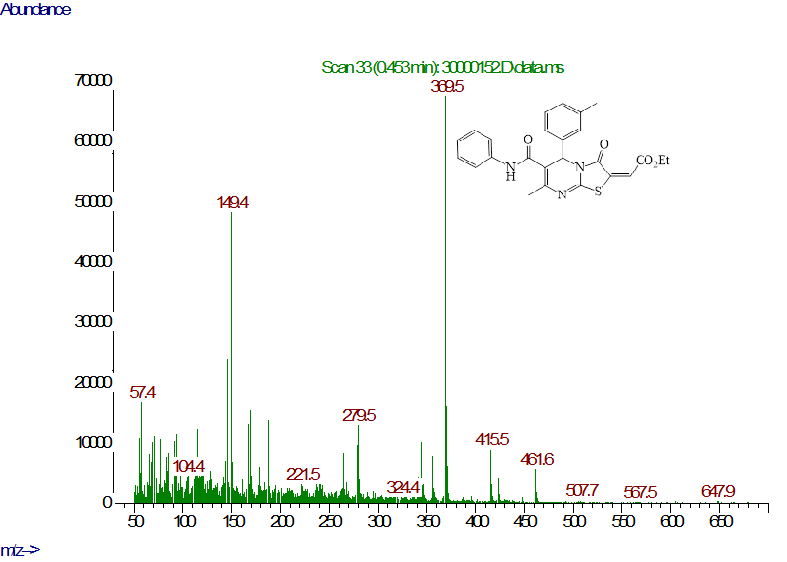


**Mass spectra of compound 6d**


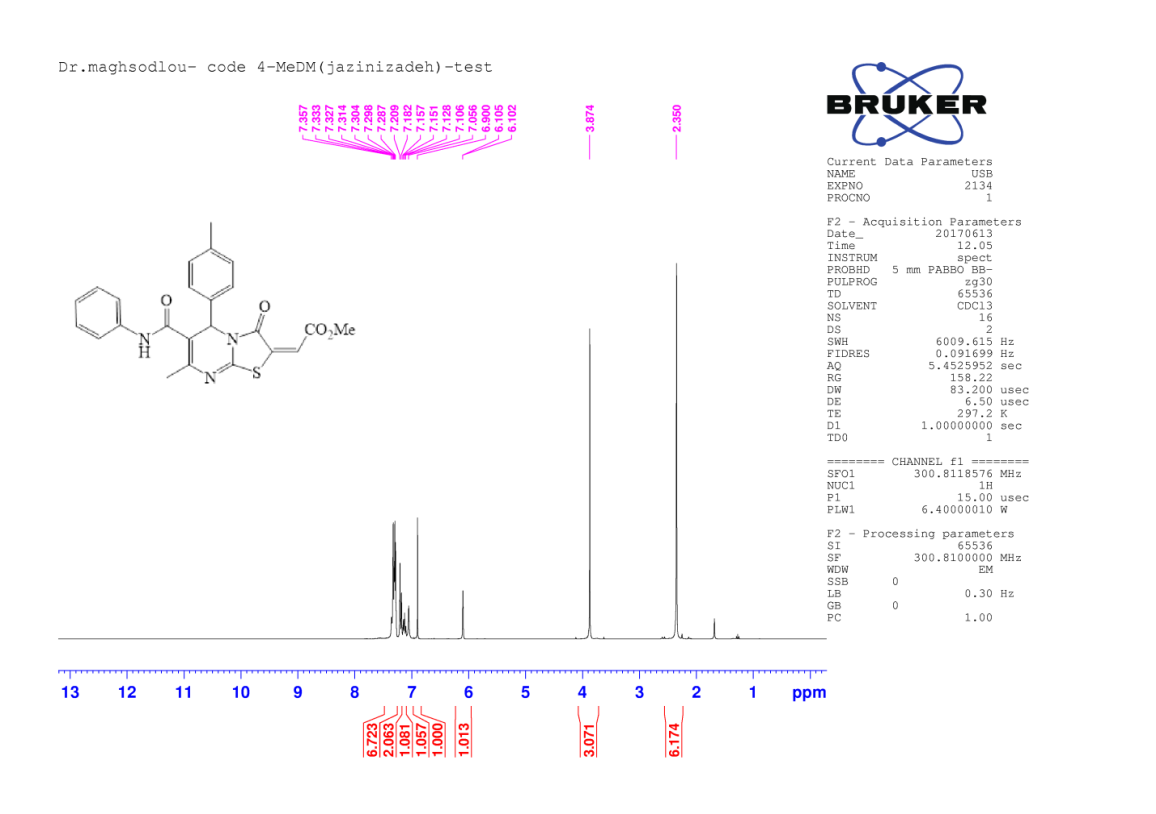


**1H NMR spectra of compound 6e**


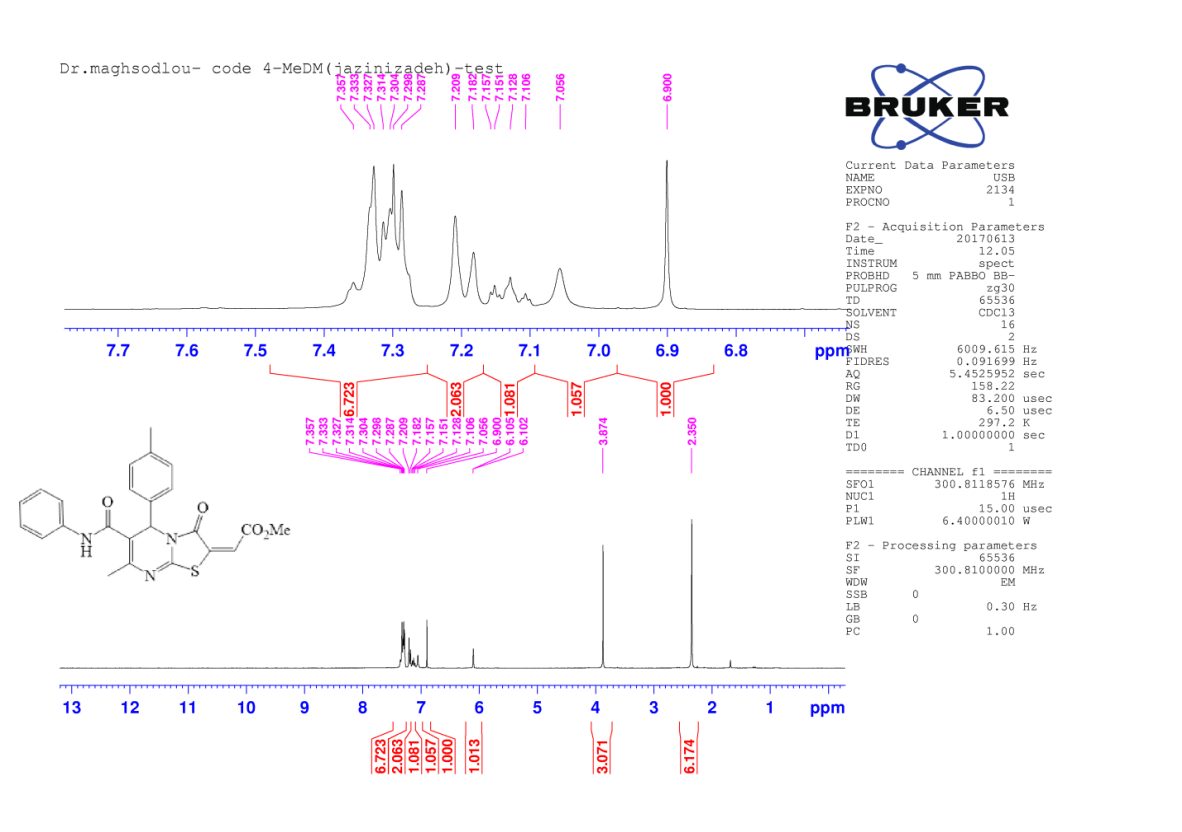


**Expanded****1H NMR spectra of compound 6e**


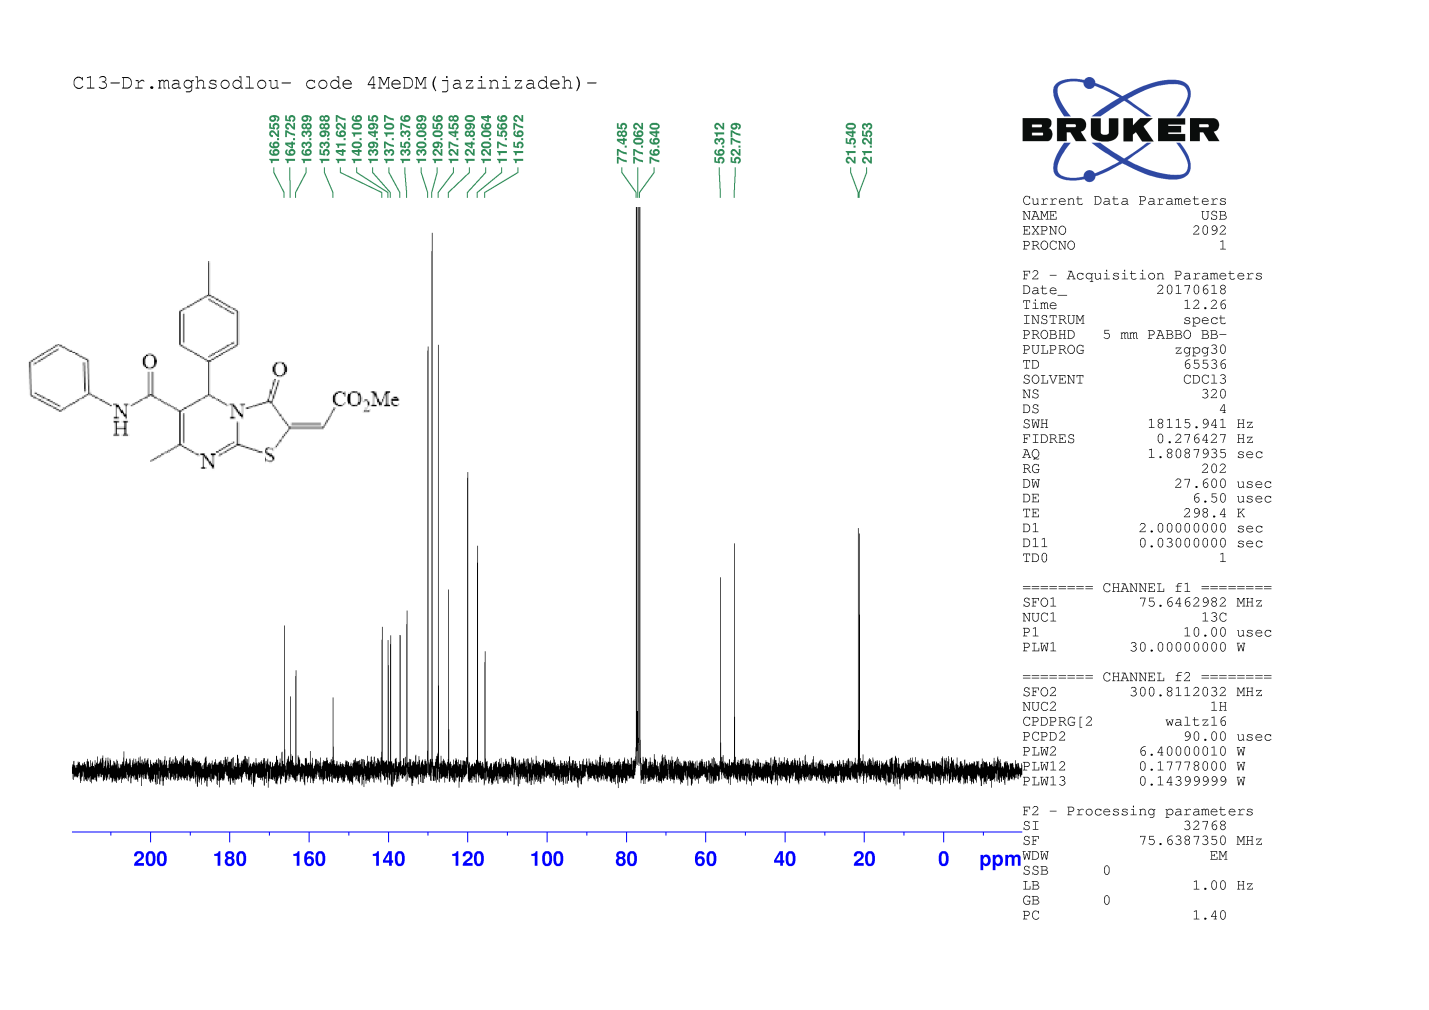


**13C NMR spectra of compound 6e**


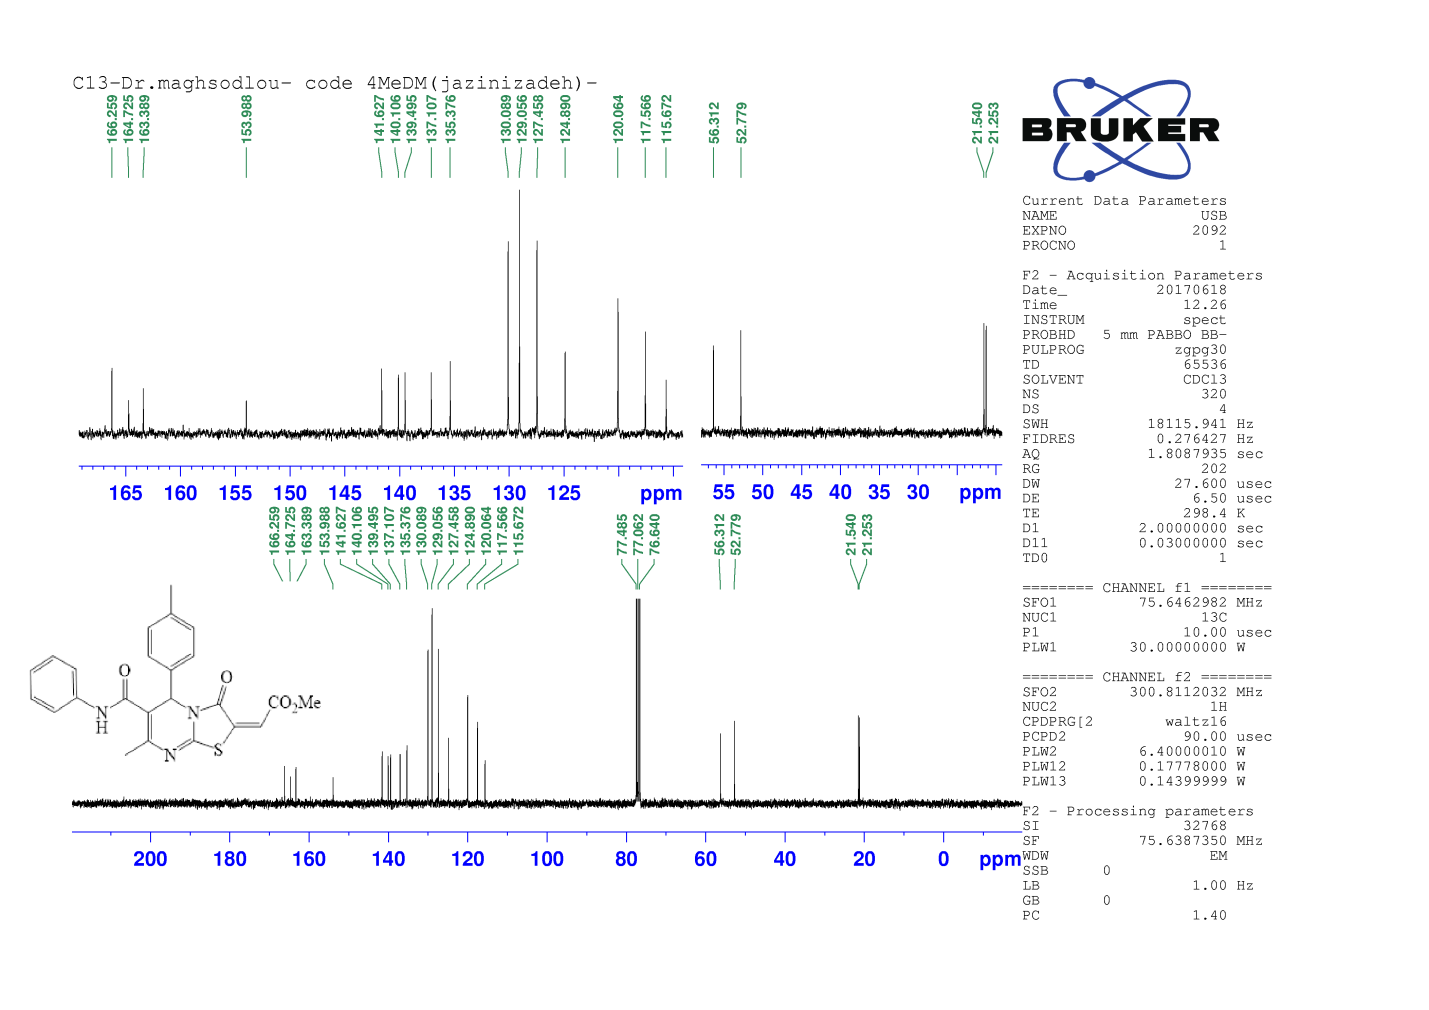


**13C NMR spectra of compound 6e**


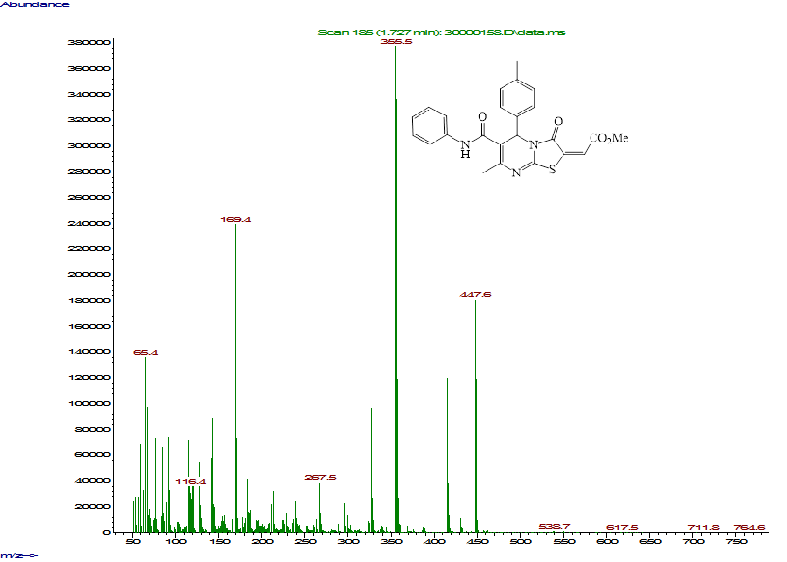


**Mass spectra of compound 6e**


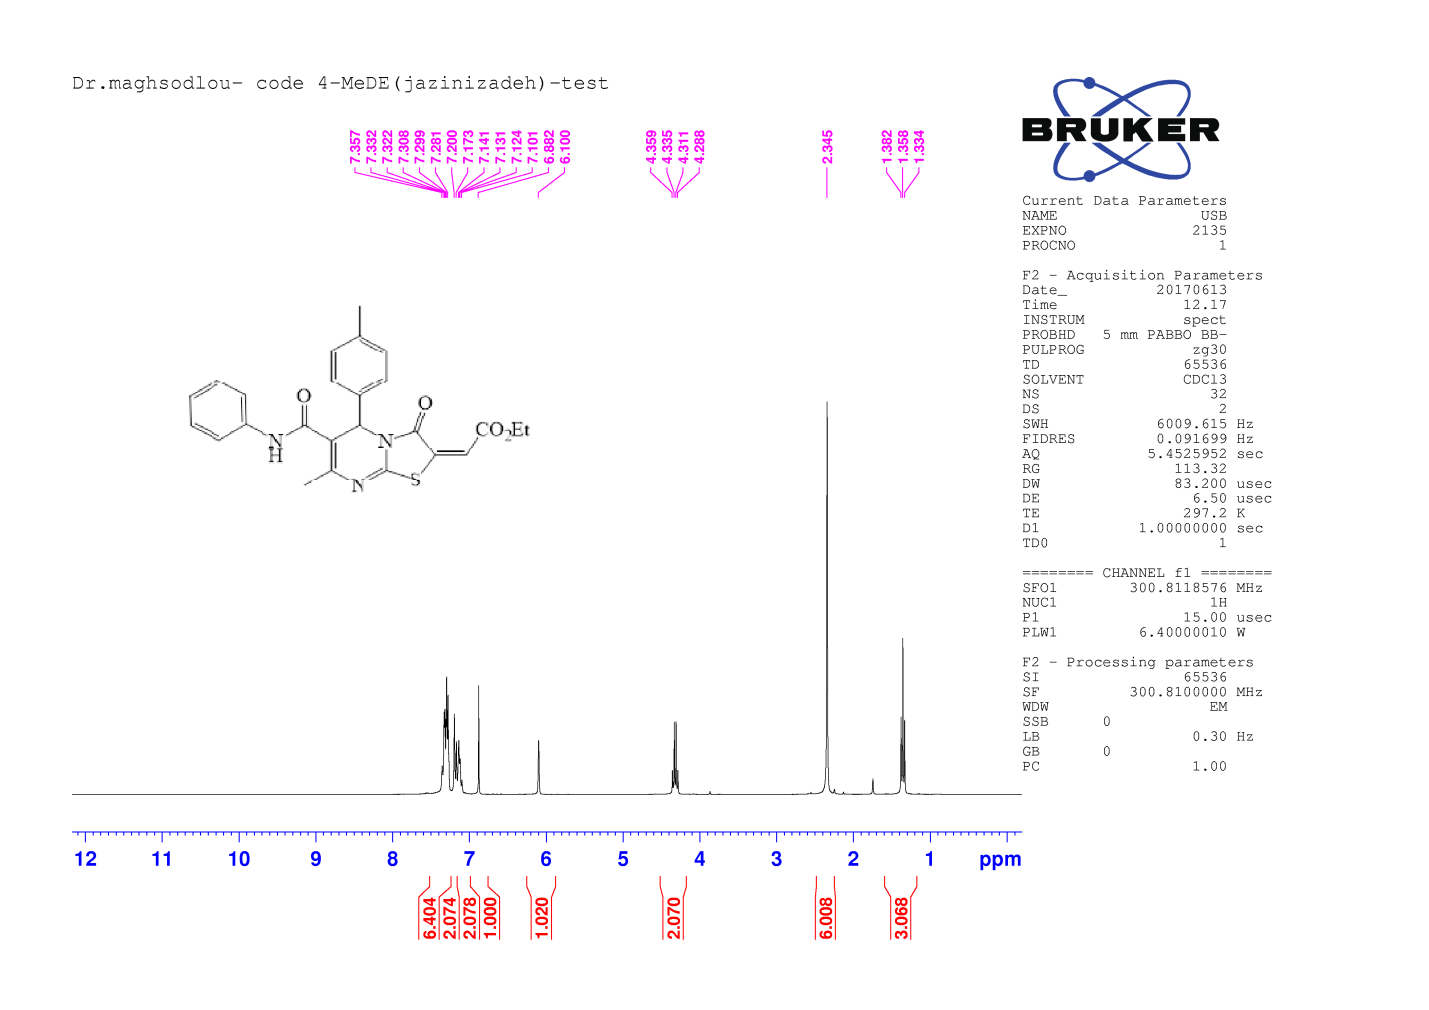


**1H NMR spectra of compound 6f**


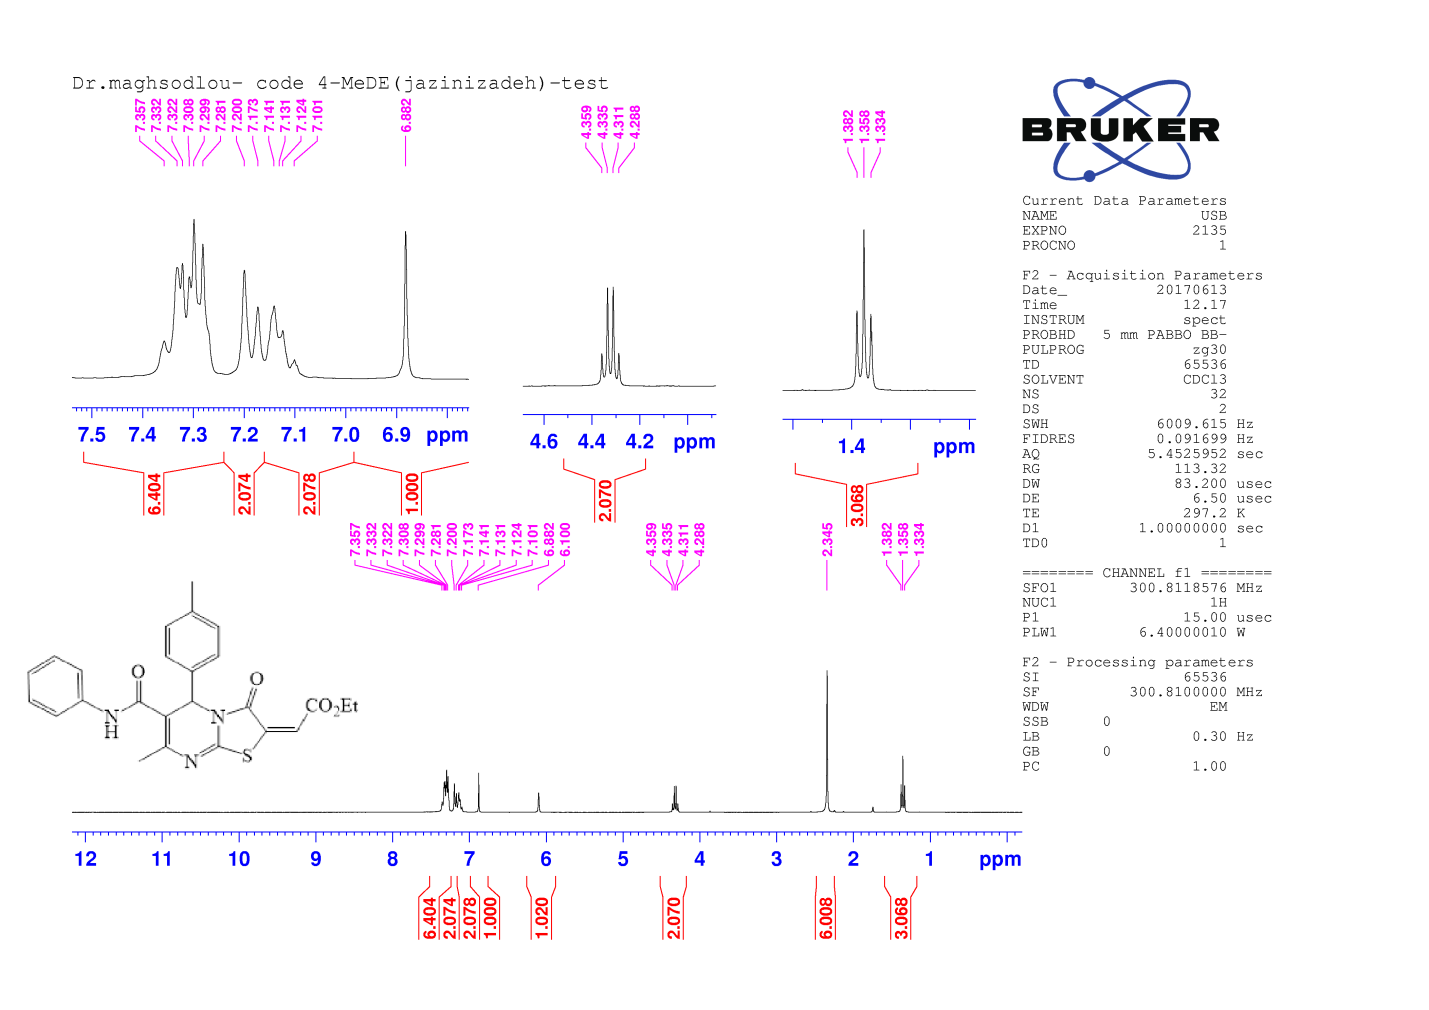


**Expanded****1H NMR spectra of compound 6f**


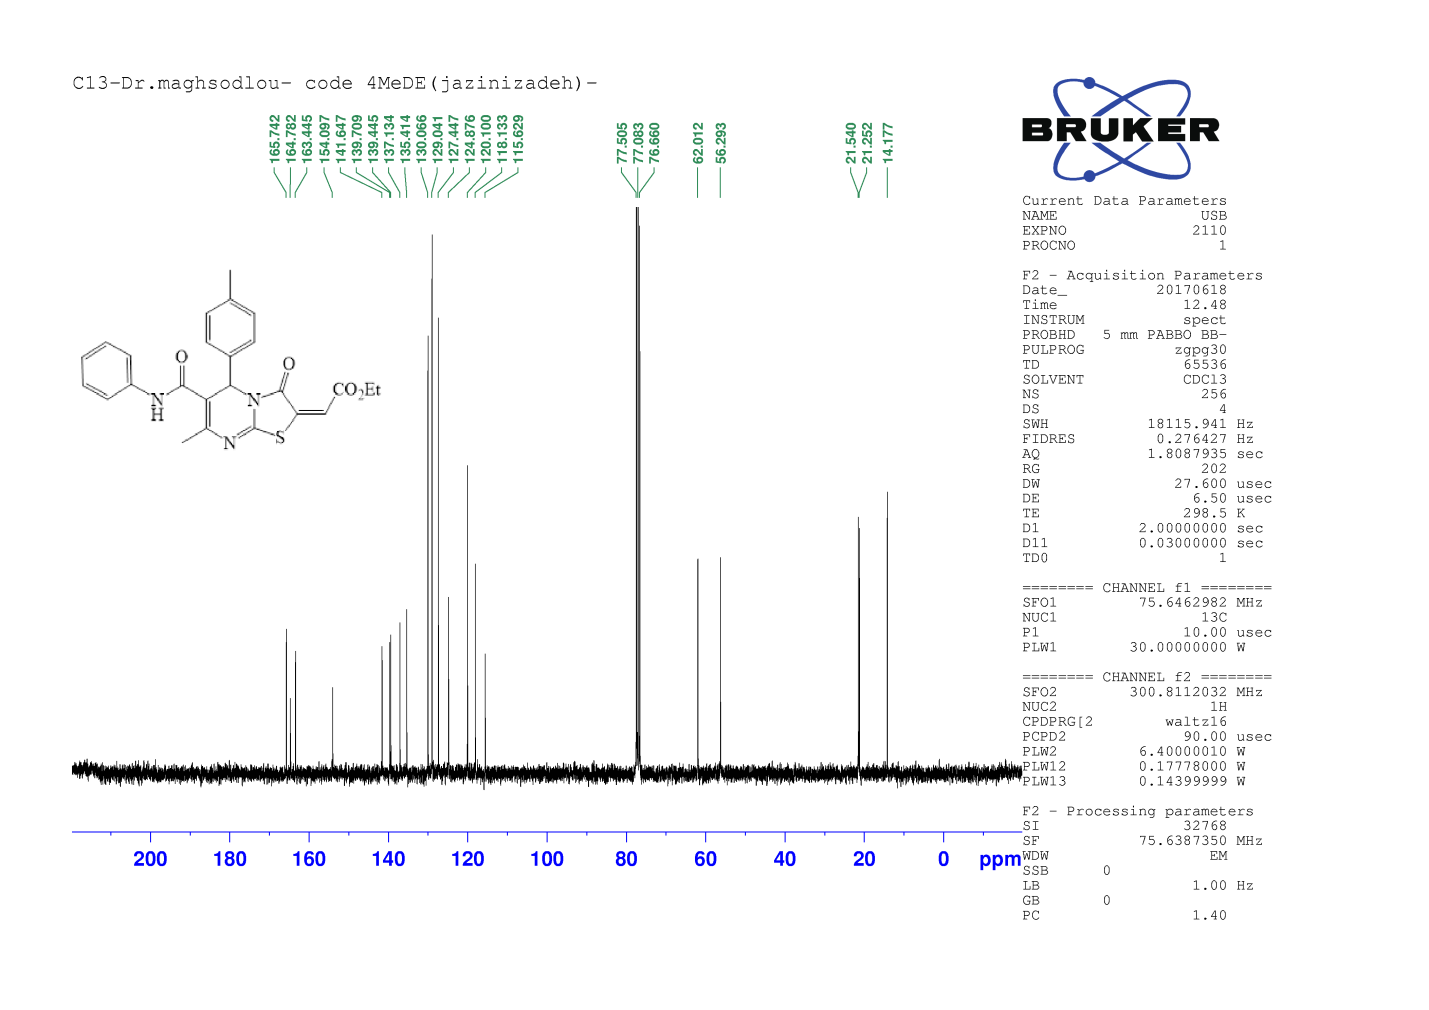


**13C NMR spectra of compound 6f**


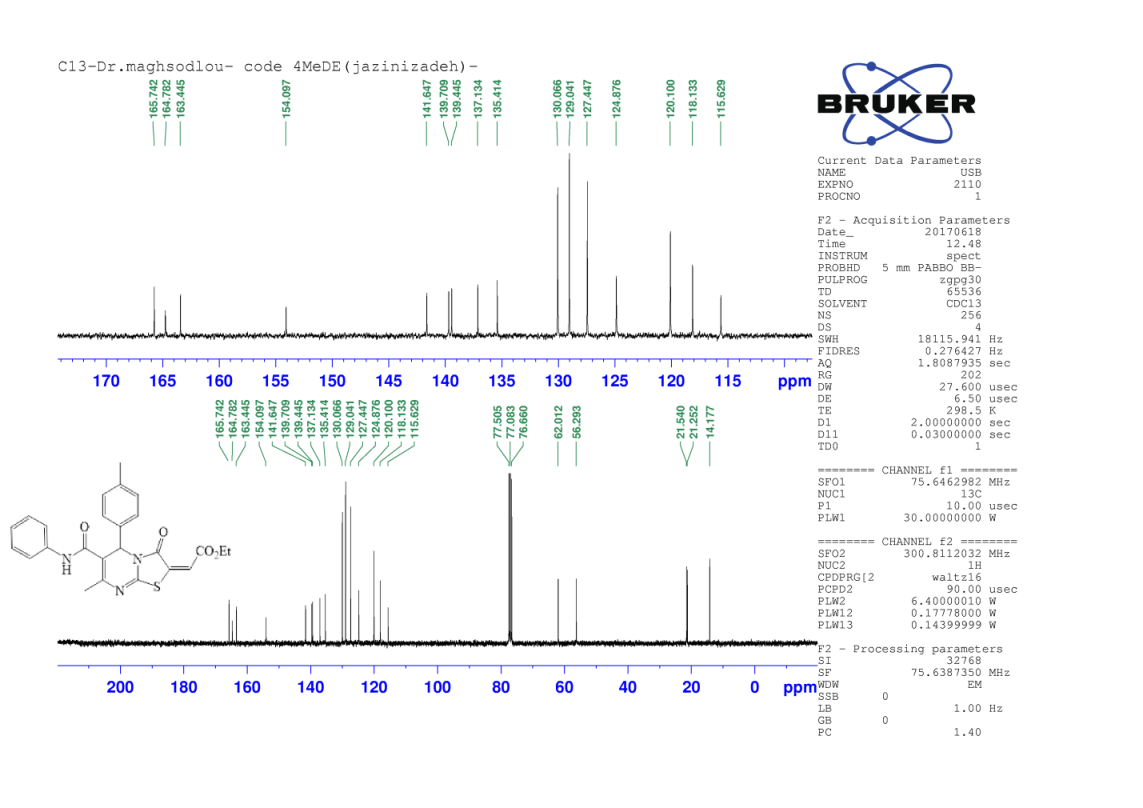


**Expanded****13C NMR spectra of compound 6f**


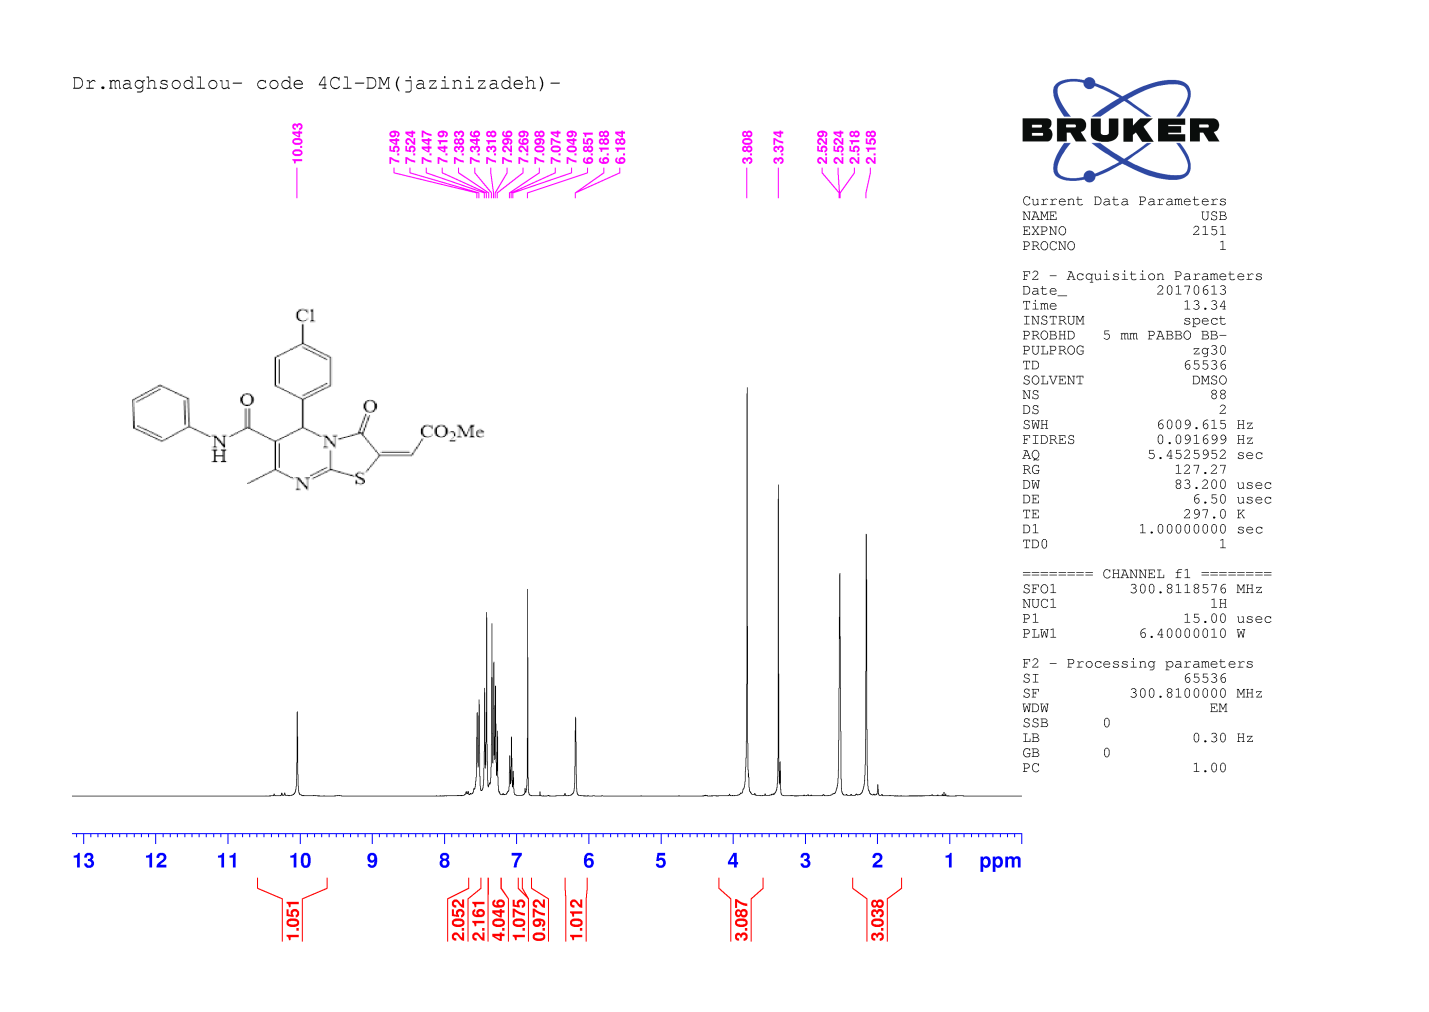


**1H NMR spectra of compound 6g**


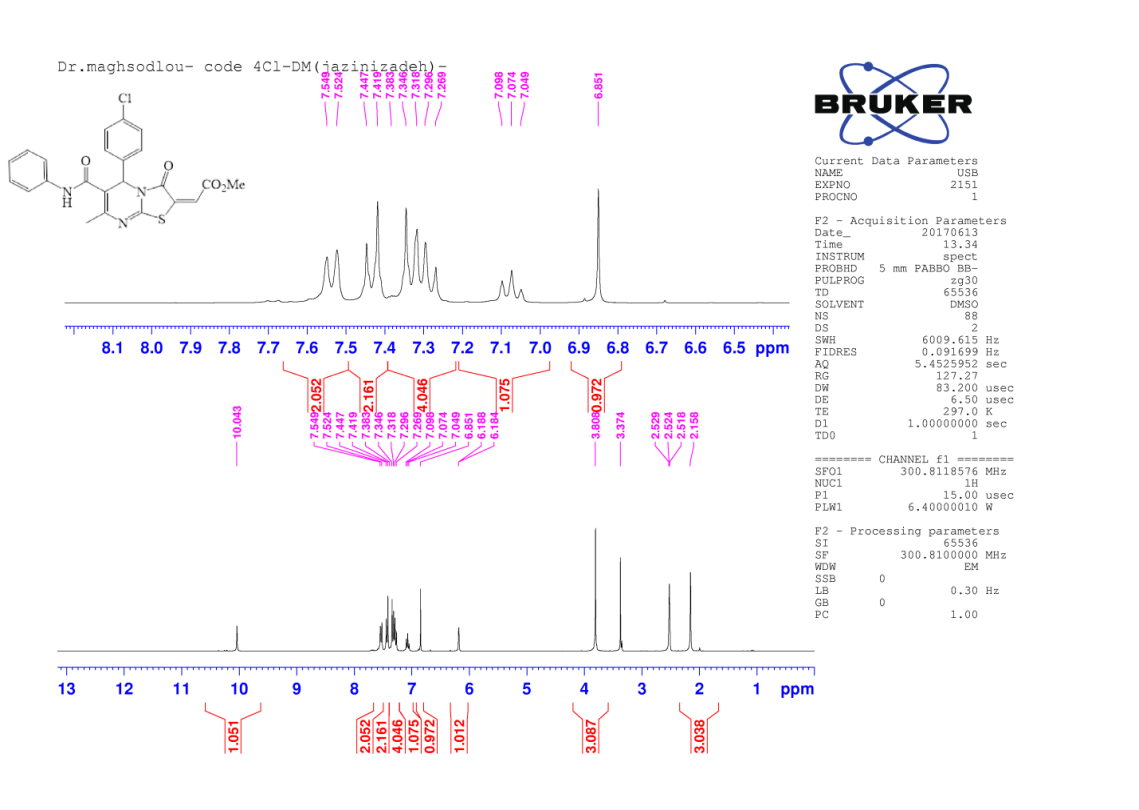


**Expanded****1H NMR spectra of compound 6g**


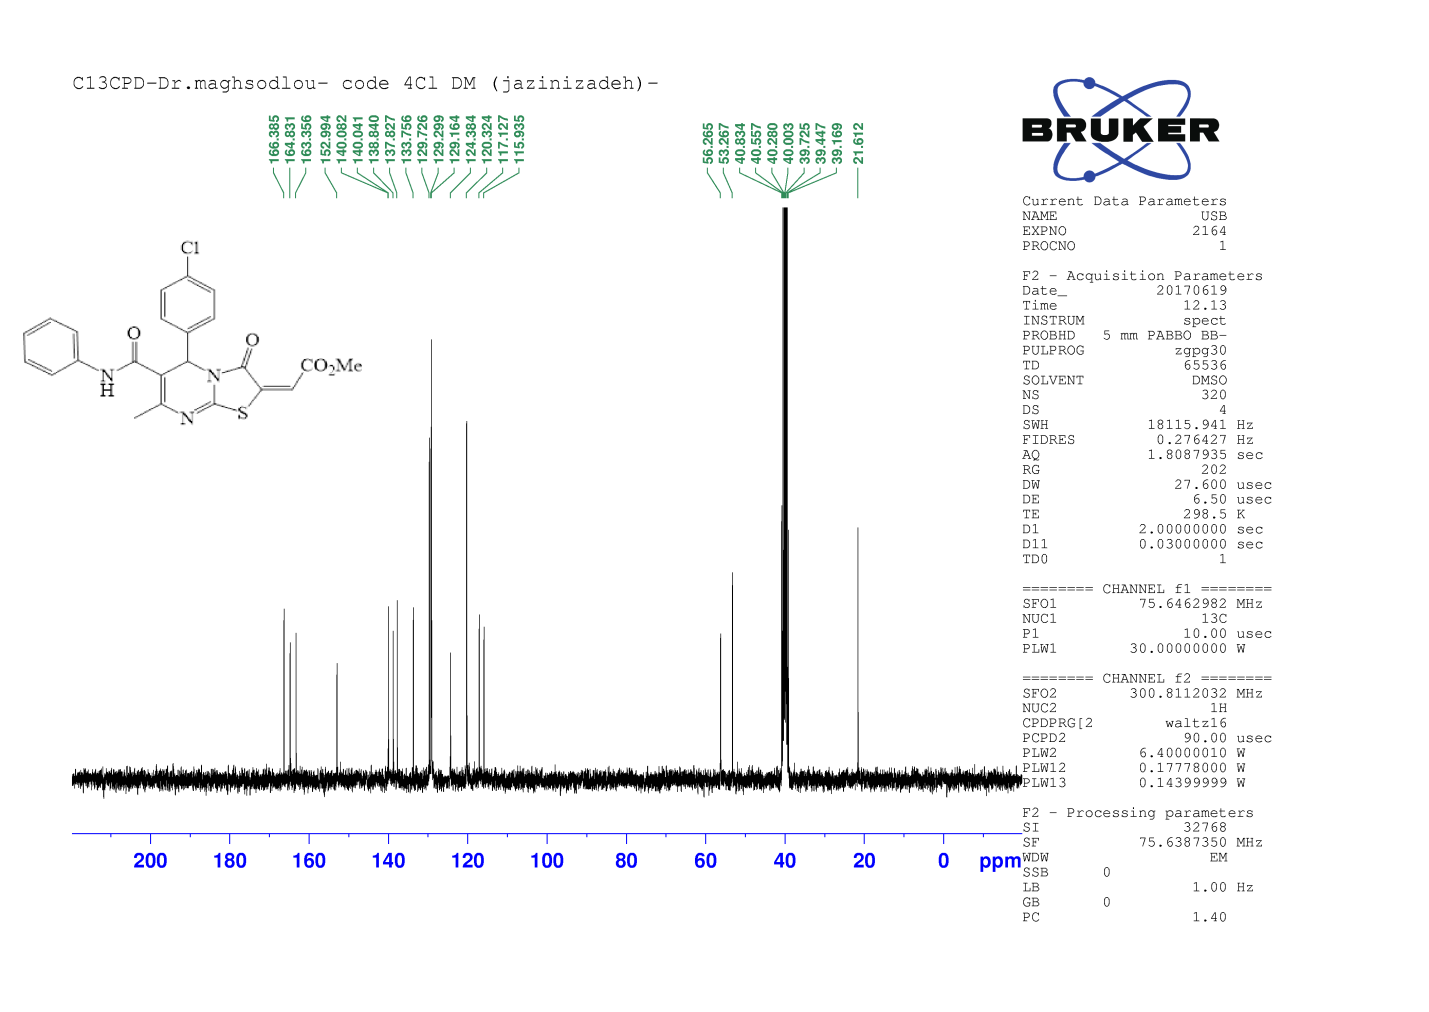


**13C NMR spectra of compound 6g**


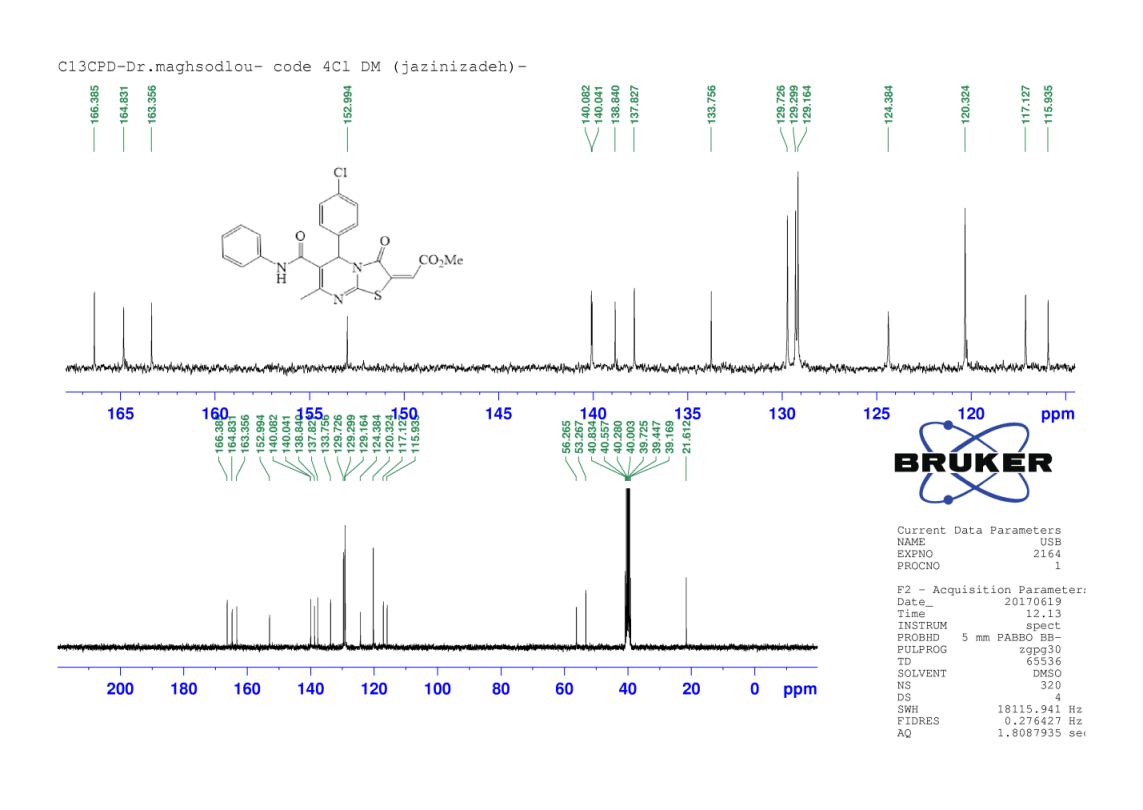


**Expanded****13C NMR spectra of compound 6g**


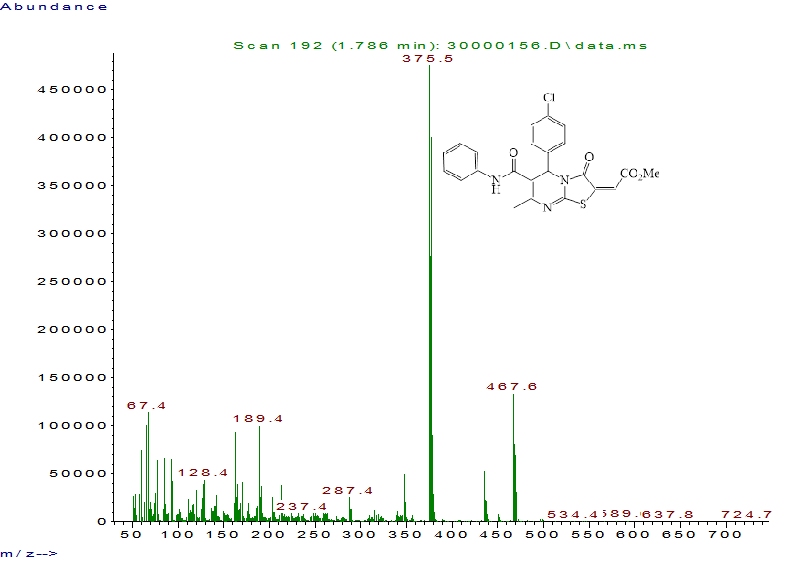


**Mass spectra of compound 6g**


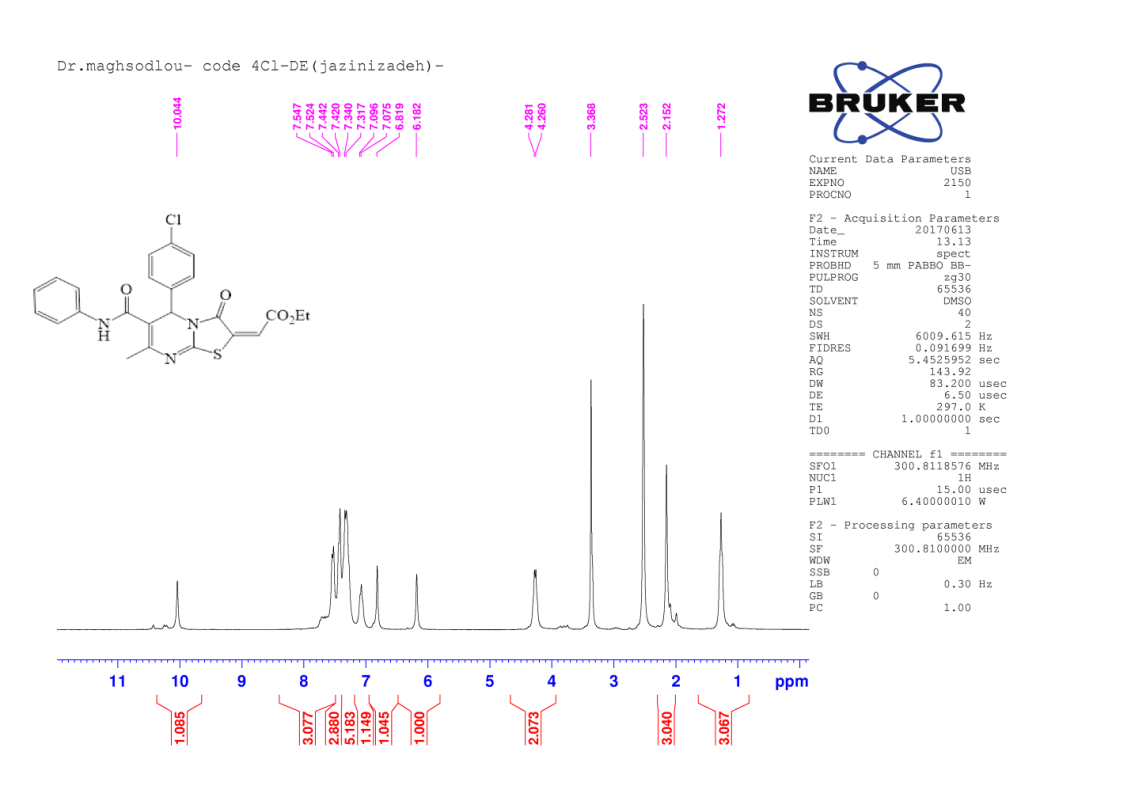


**1H NMR spectra of compound 6h**


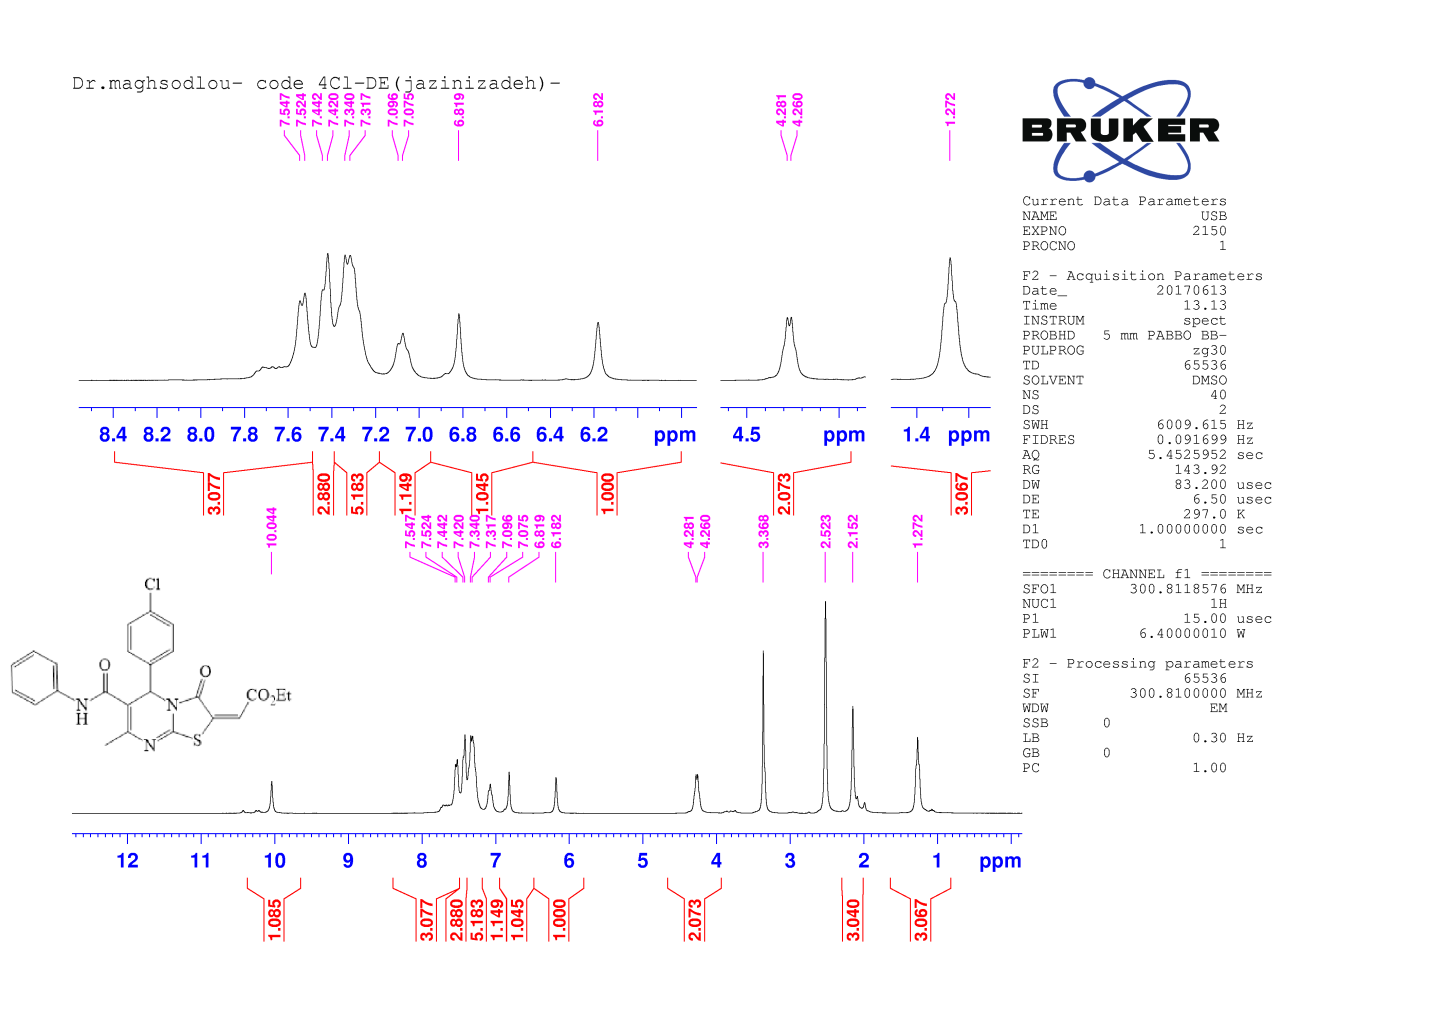


**Expanded****1H NMR spectra of compound 6h**


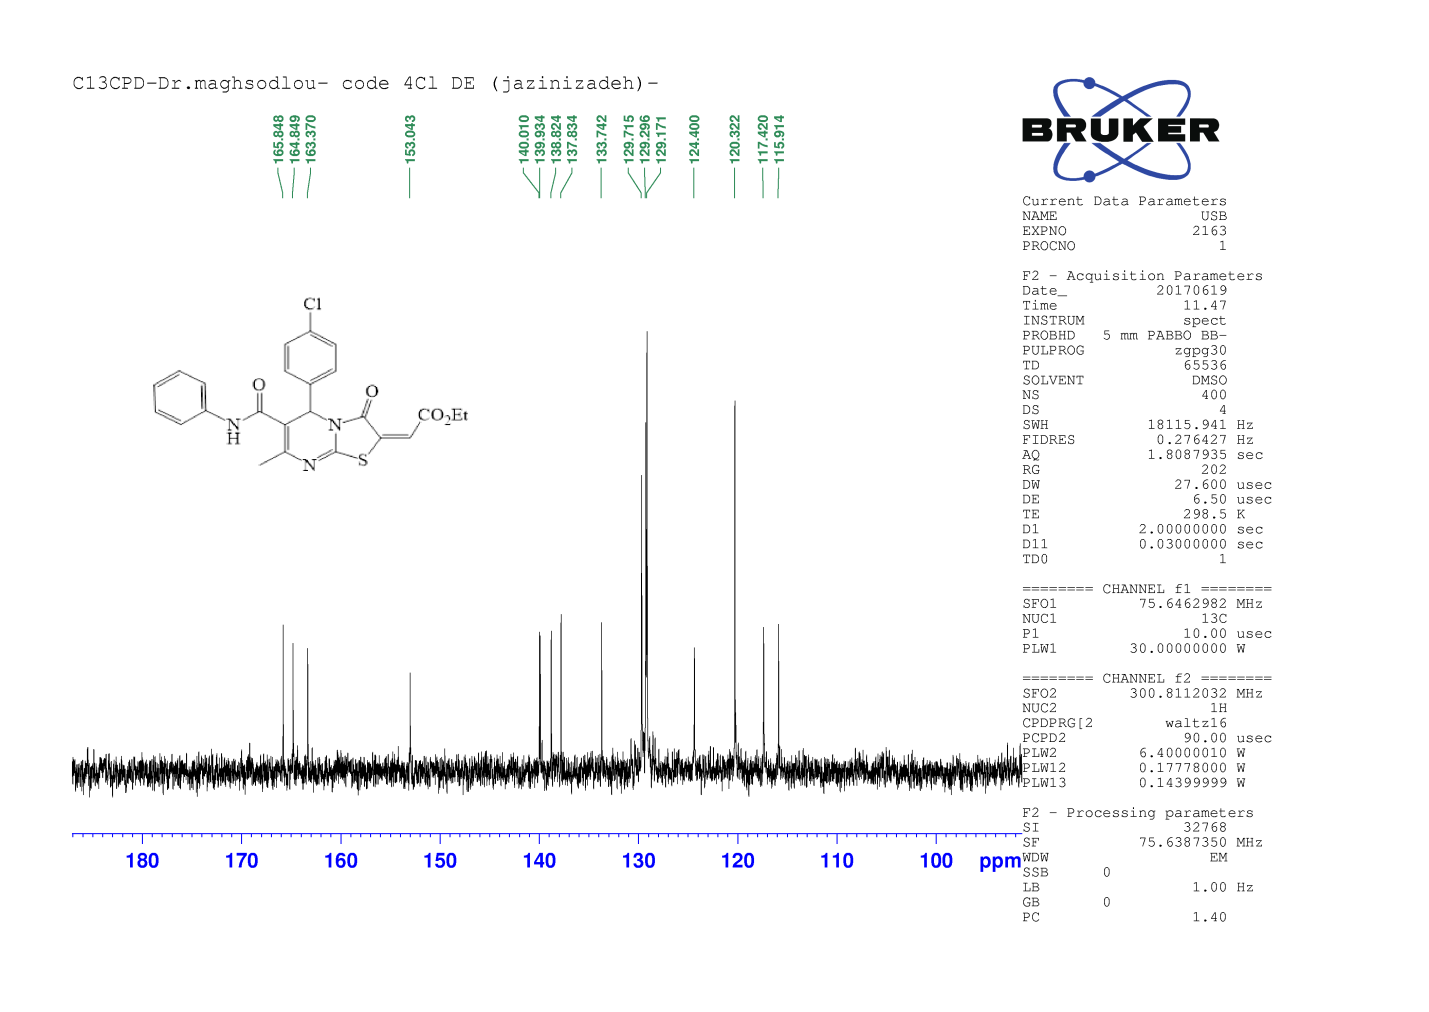


**13C NMR spectra of compound 6h**


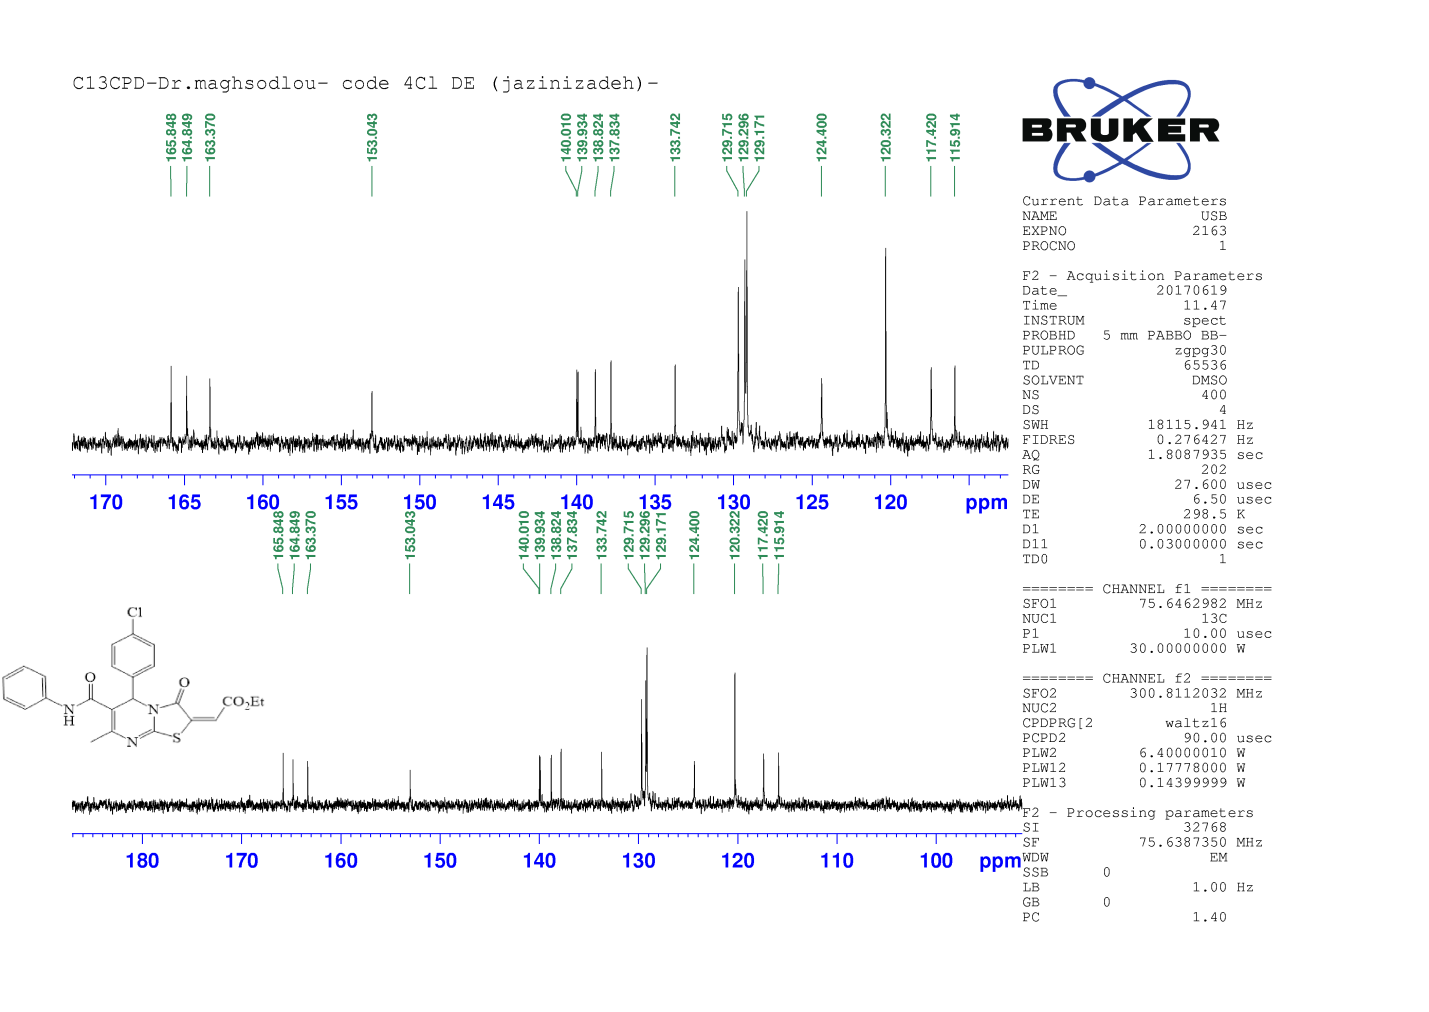


**Expanded****13C NMR spectra of compound 6h**


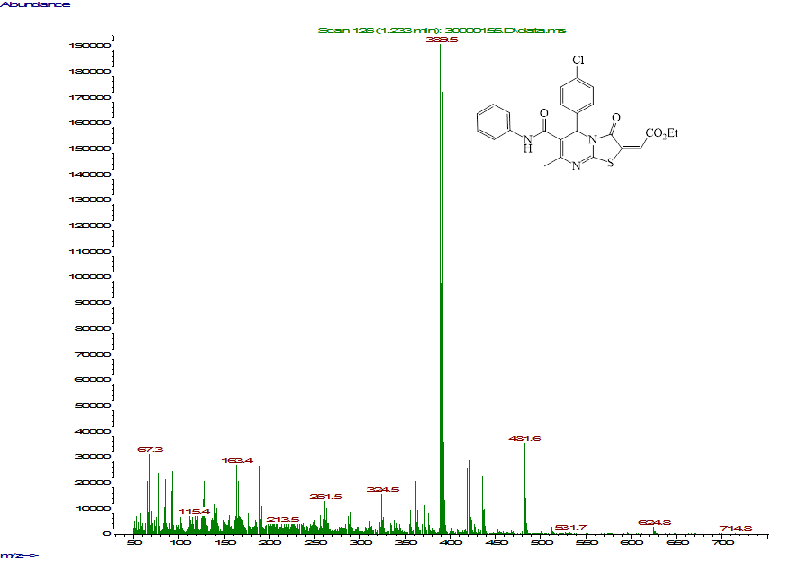


**Mass spectra of compound 6h**


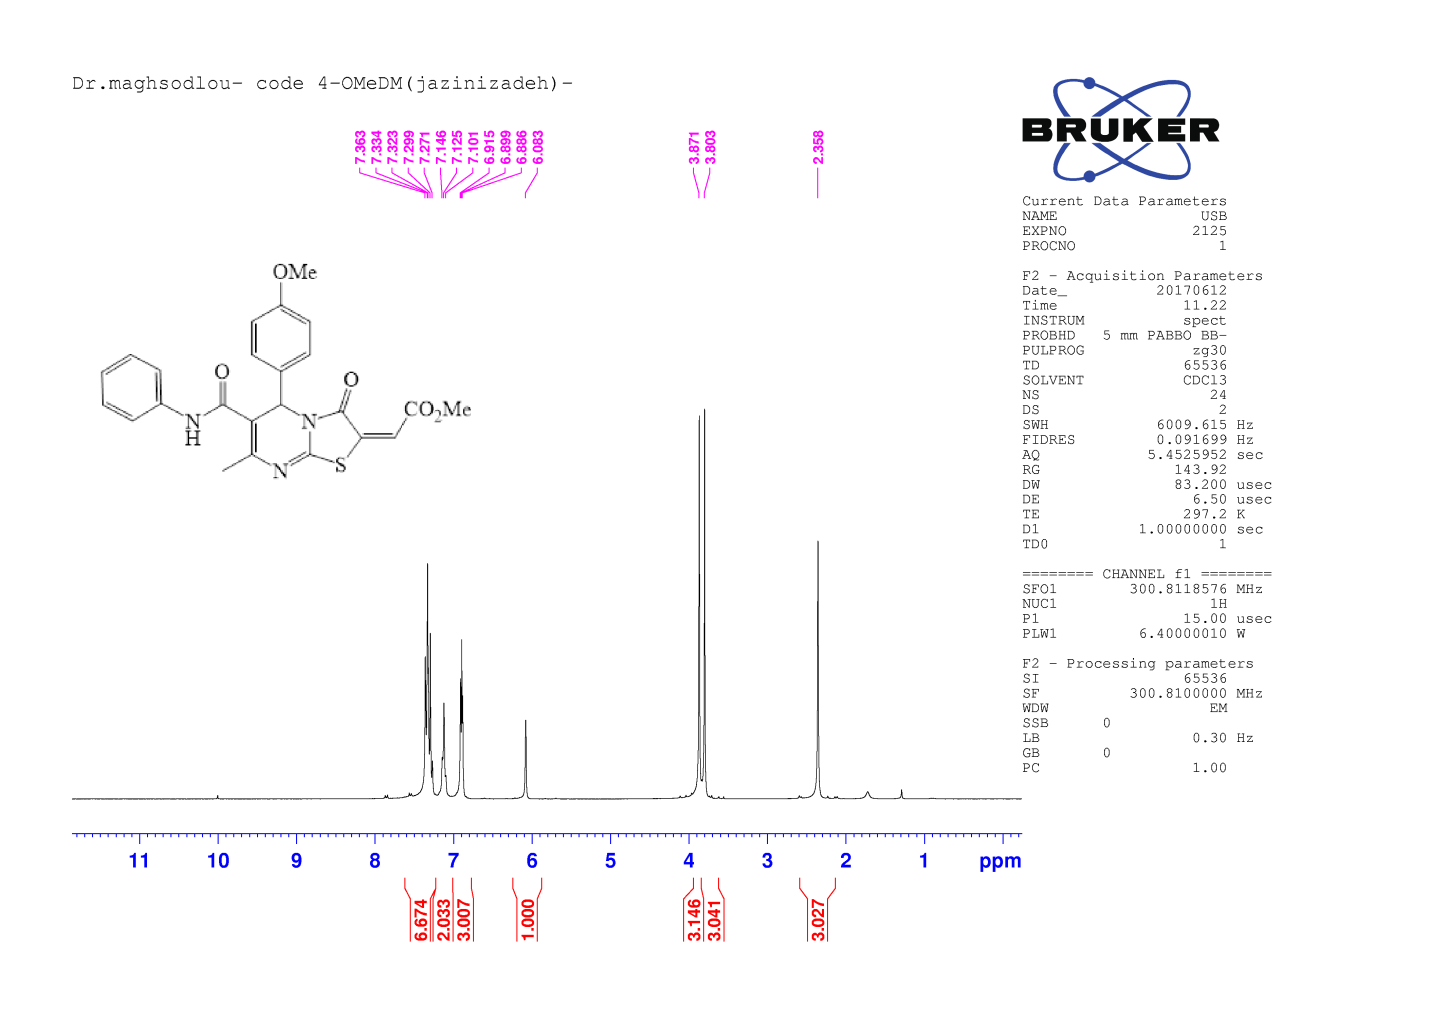


**1H NMR spectra of compound 6i**


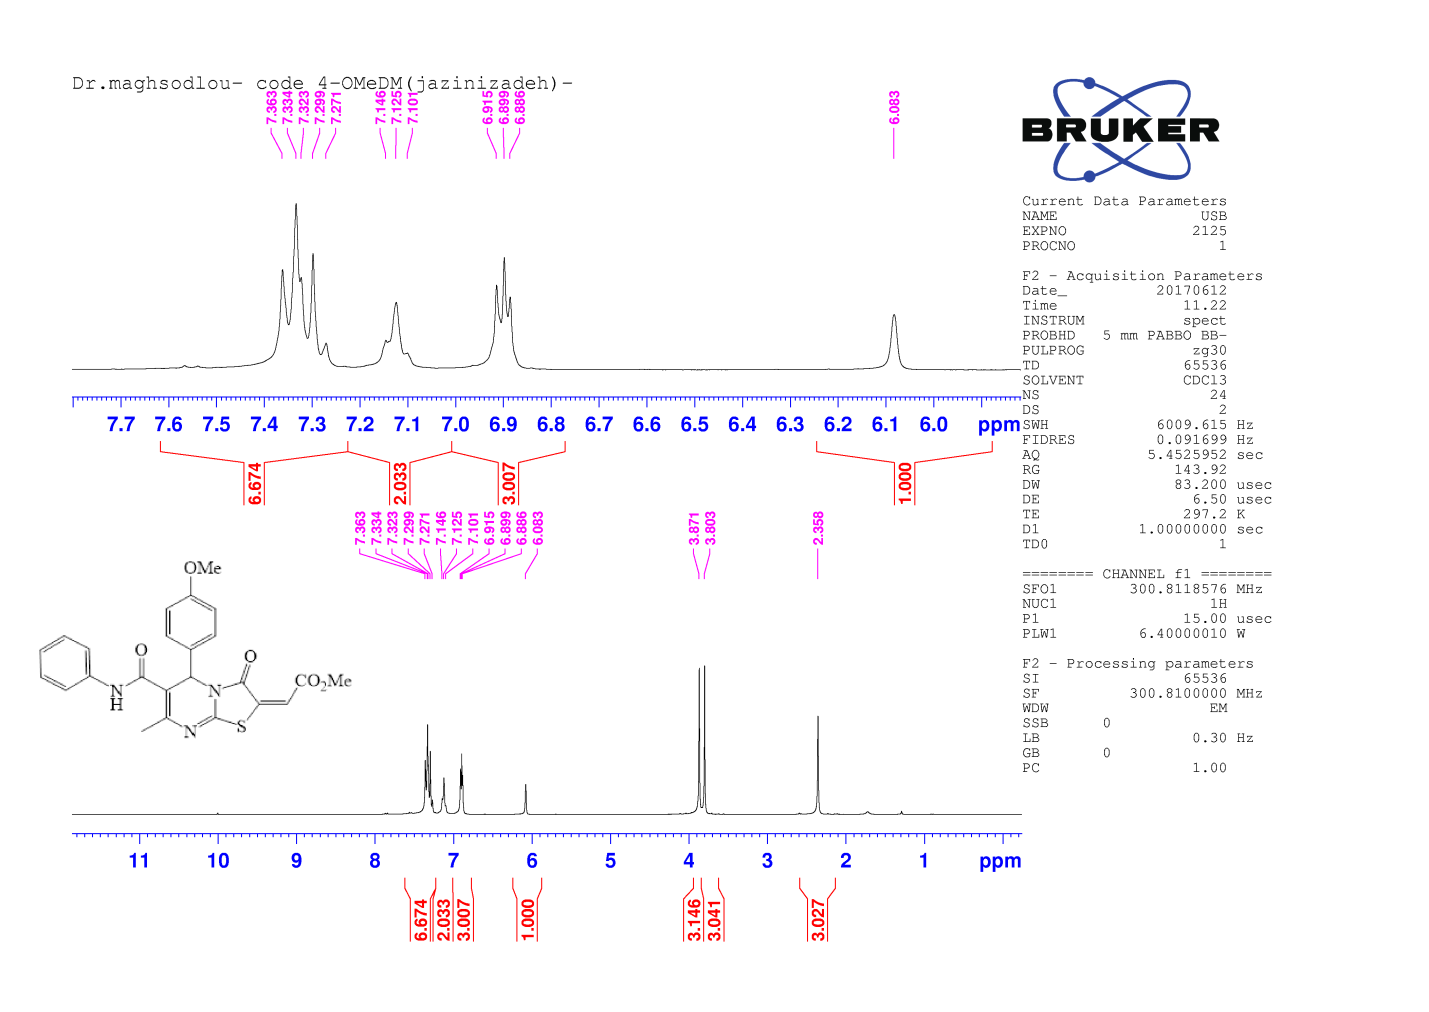


**Expanded****1H NMR spectra of compound 6i**


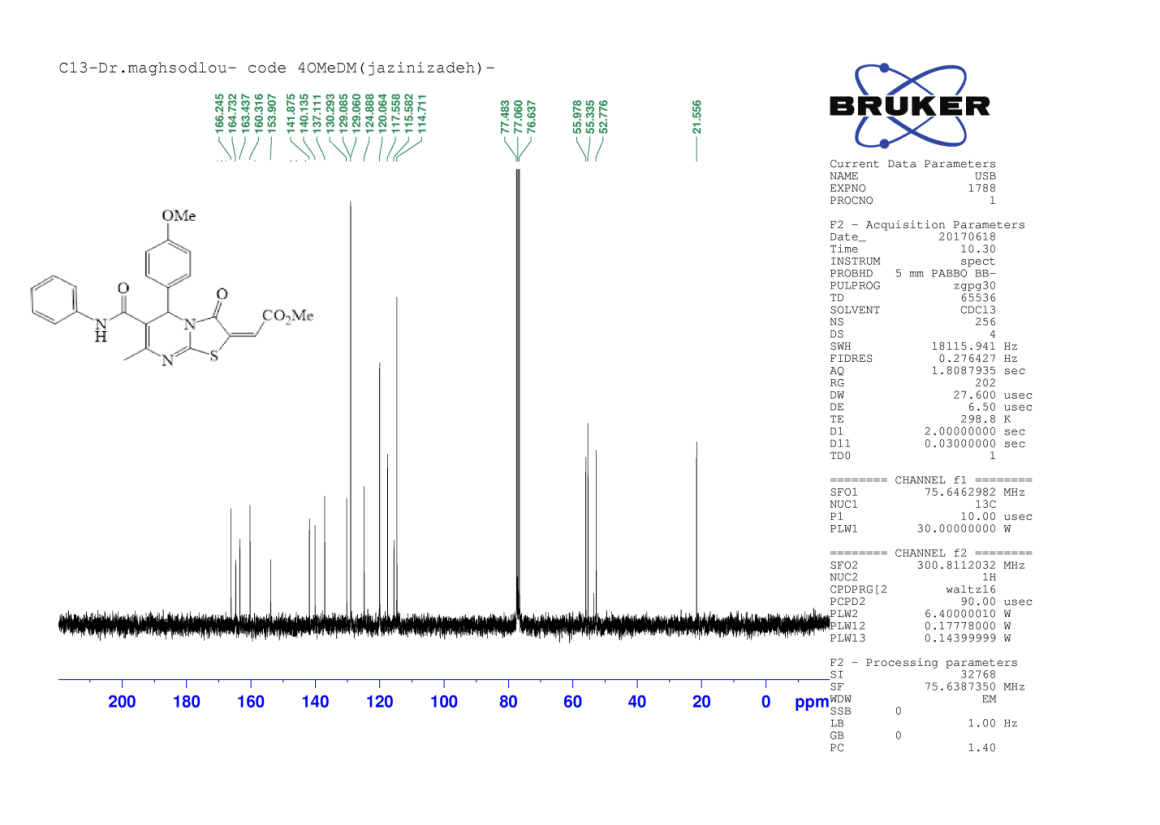


**13C NMR spectra of compound 6i**


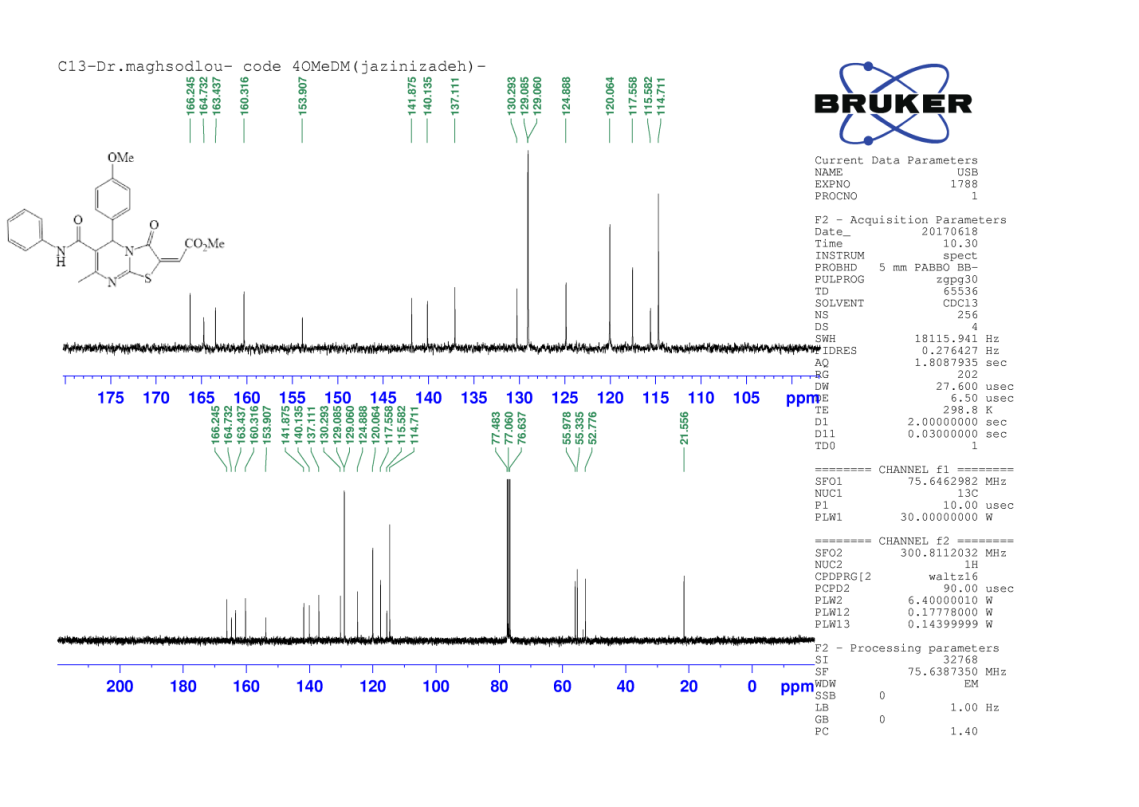


**Expanded****13C NMR spectra of compound 6i**


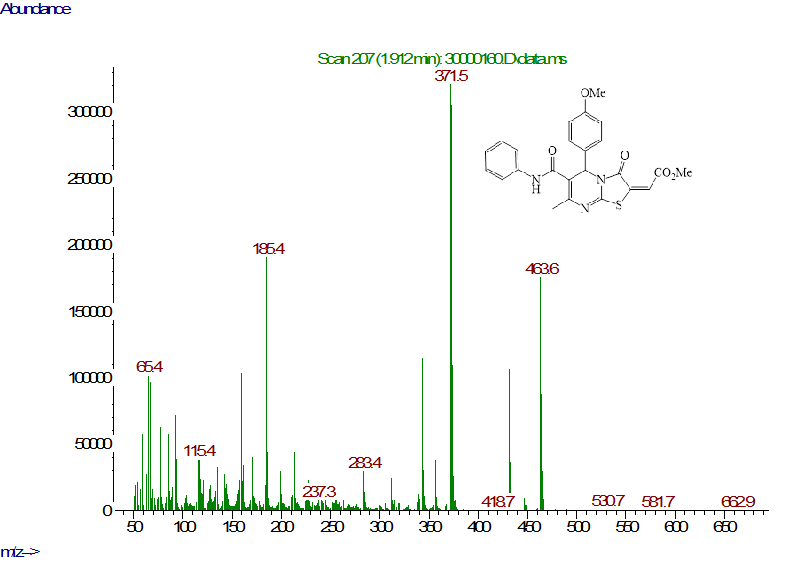


**Mass spectra of compound 6i**


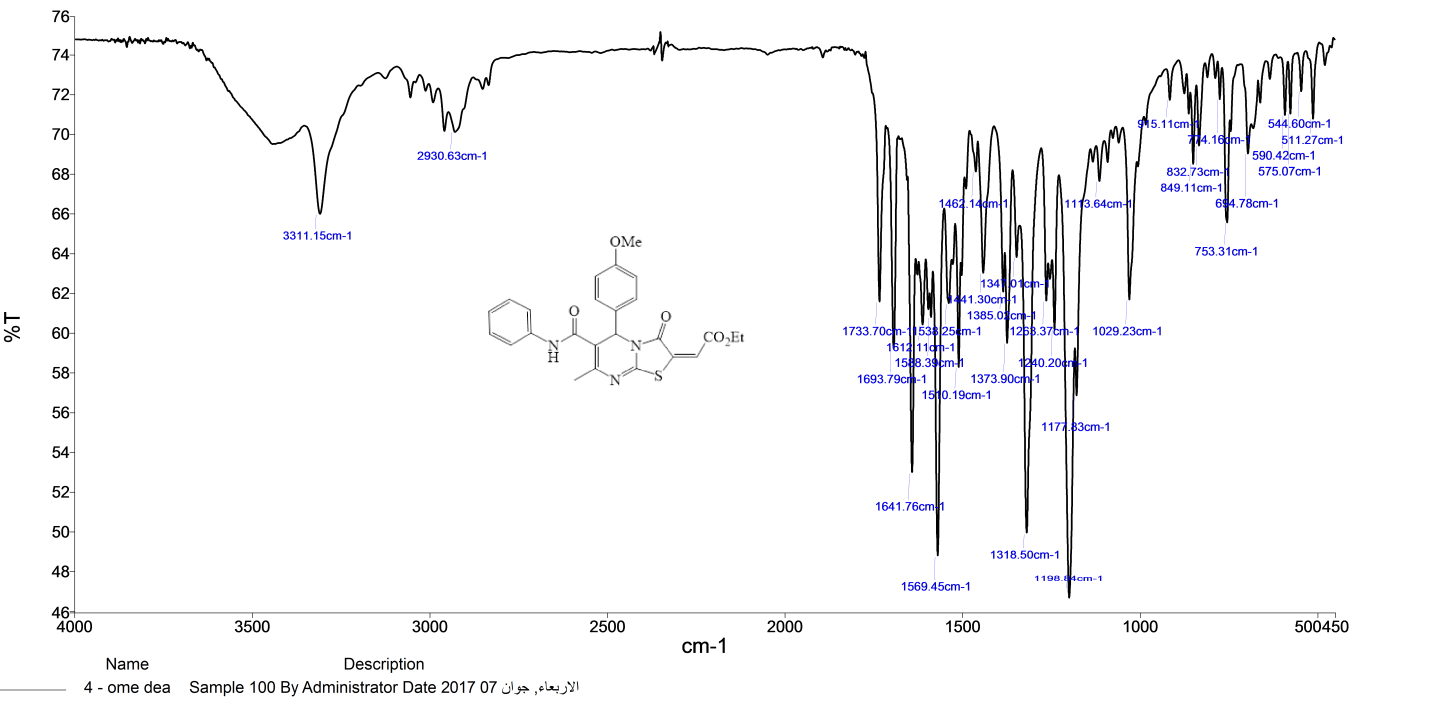


**FT-IR spectra of compound 6j**


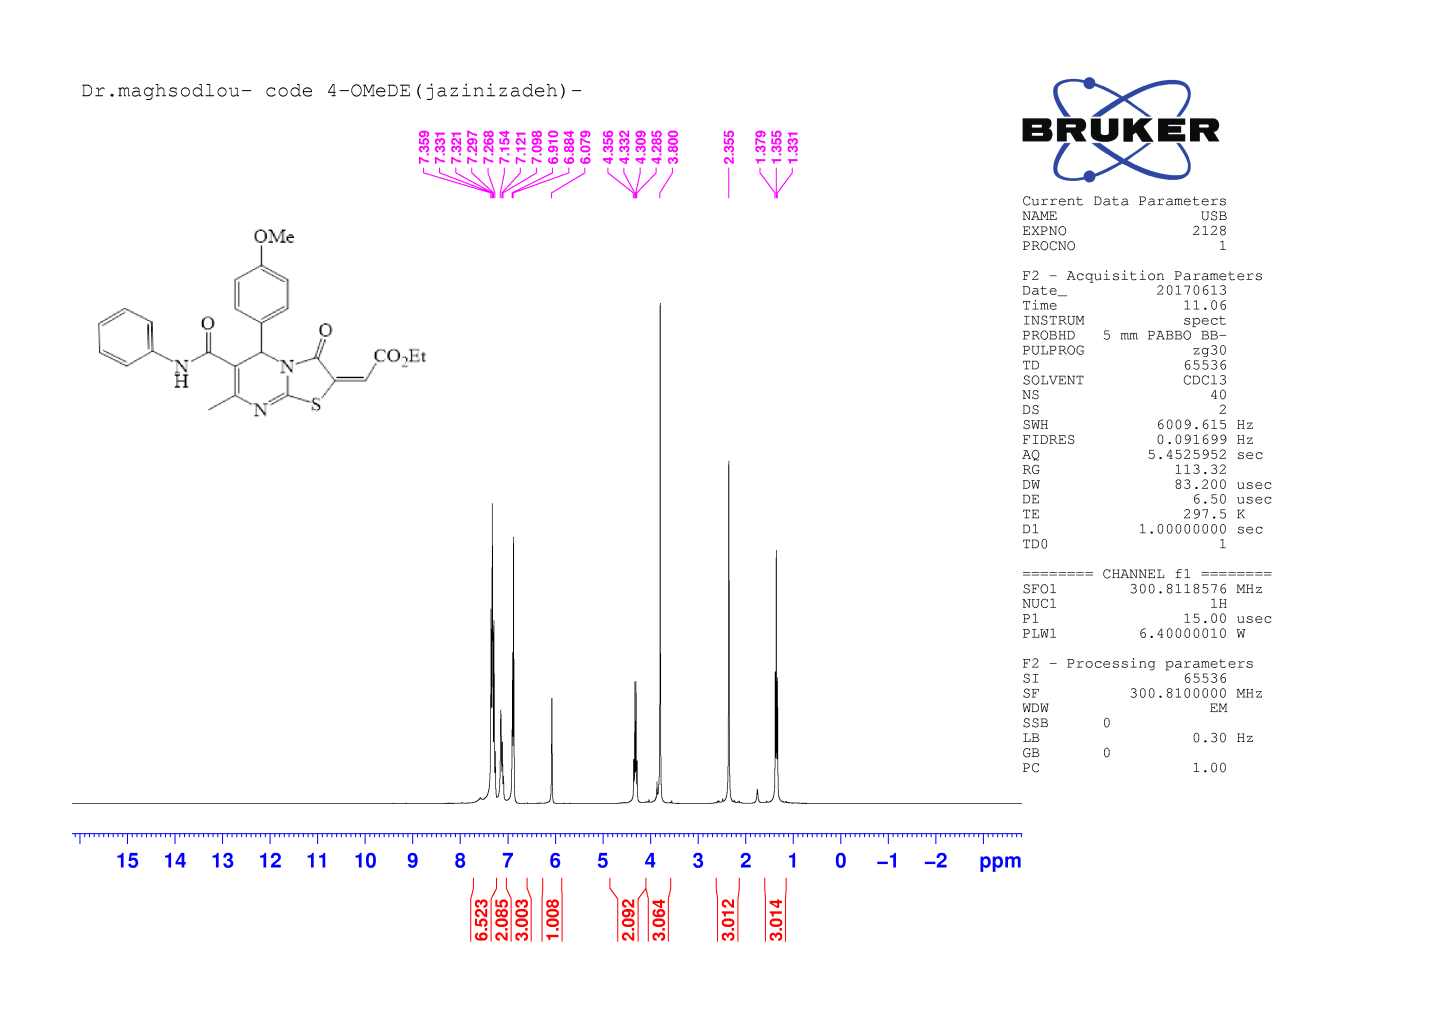


**1H NMR spectra of compound 6j**


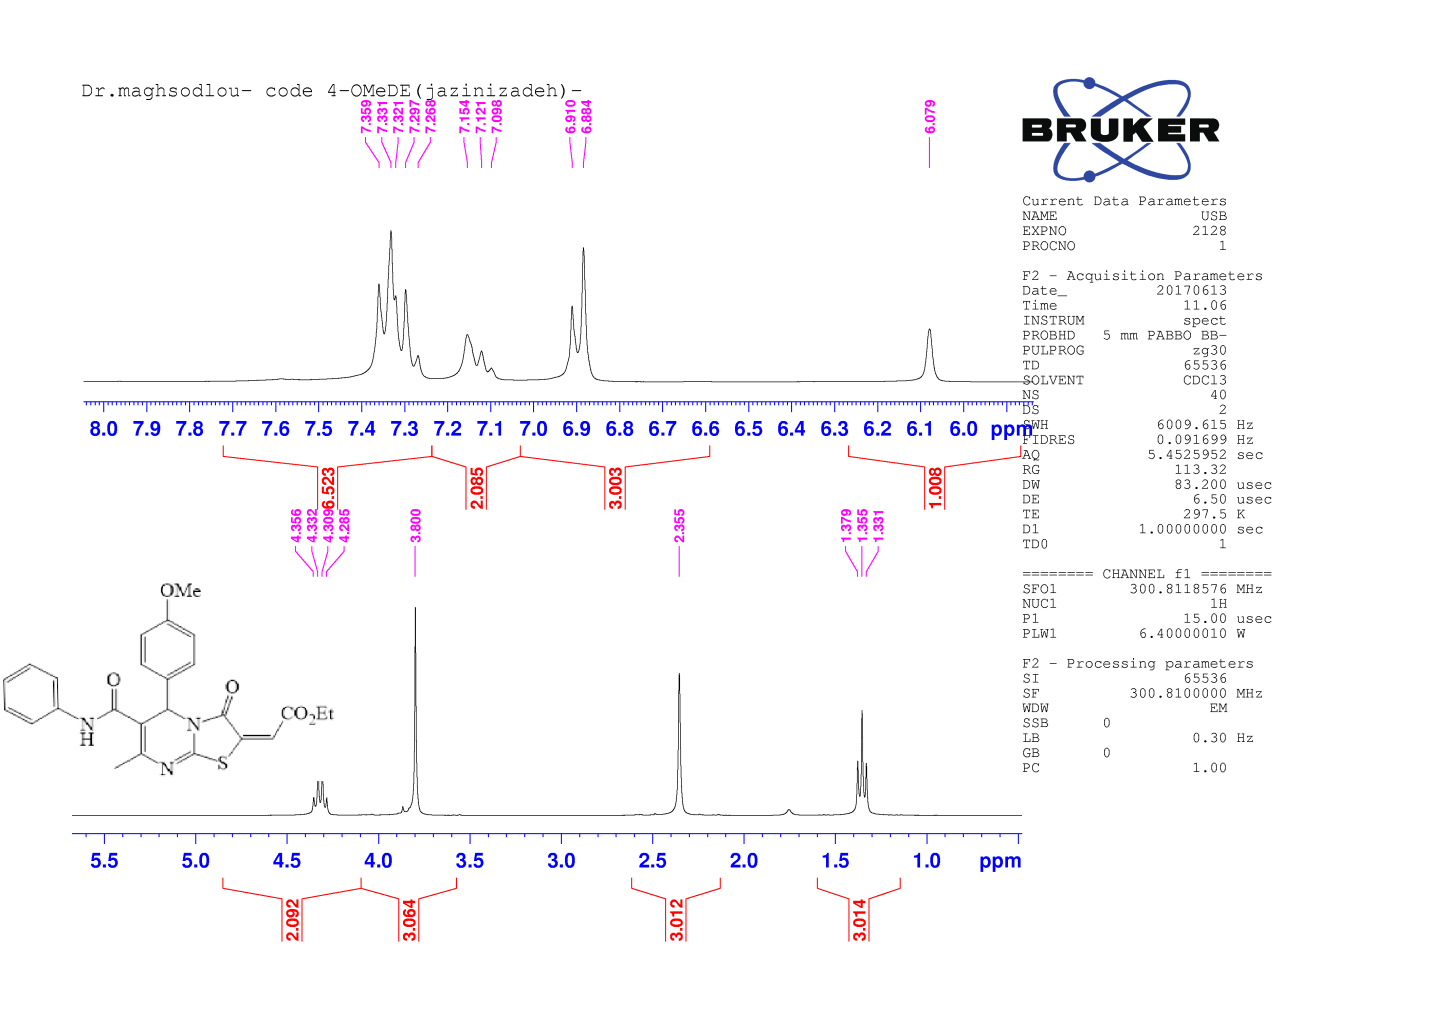


**Expanded****1H NMR spectra of compound 6j**


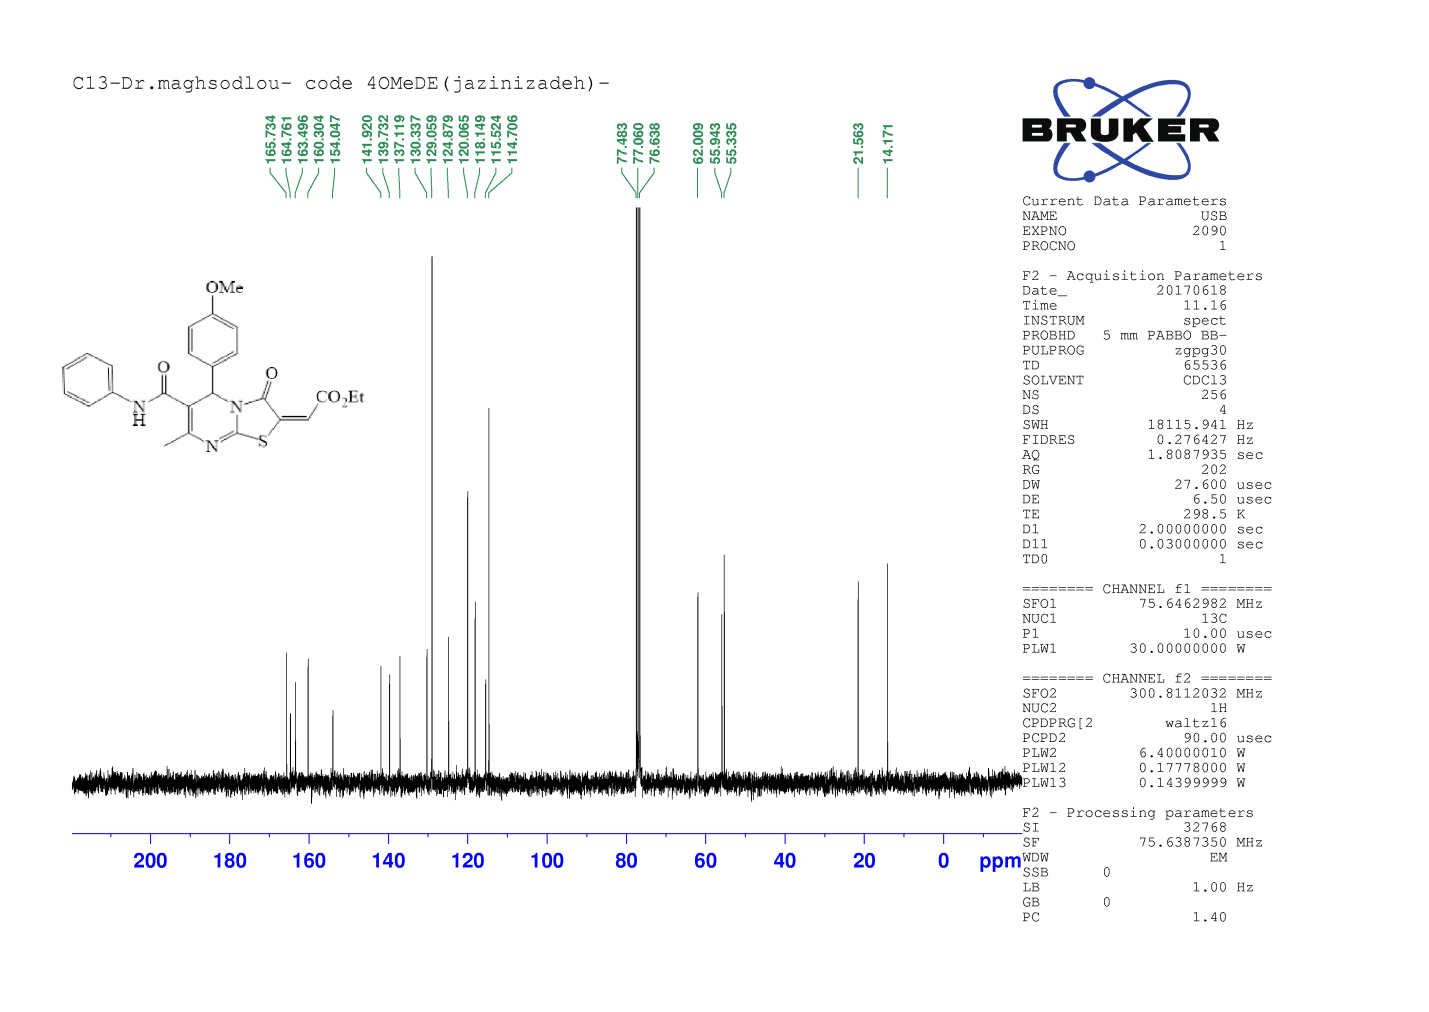


**13C NMR spectra of compound 6j**


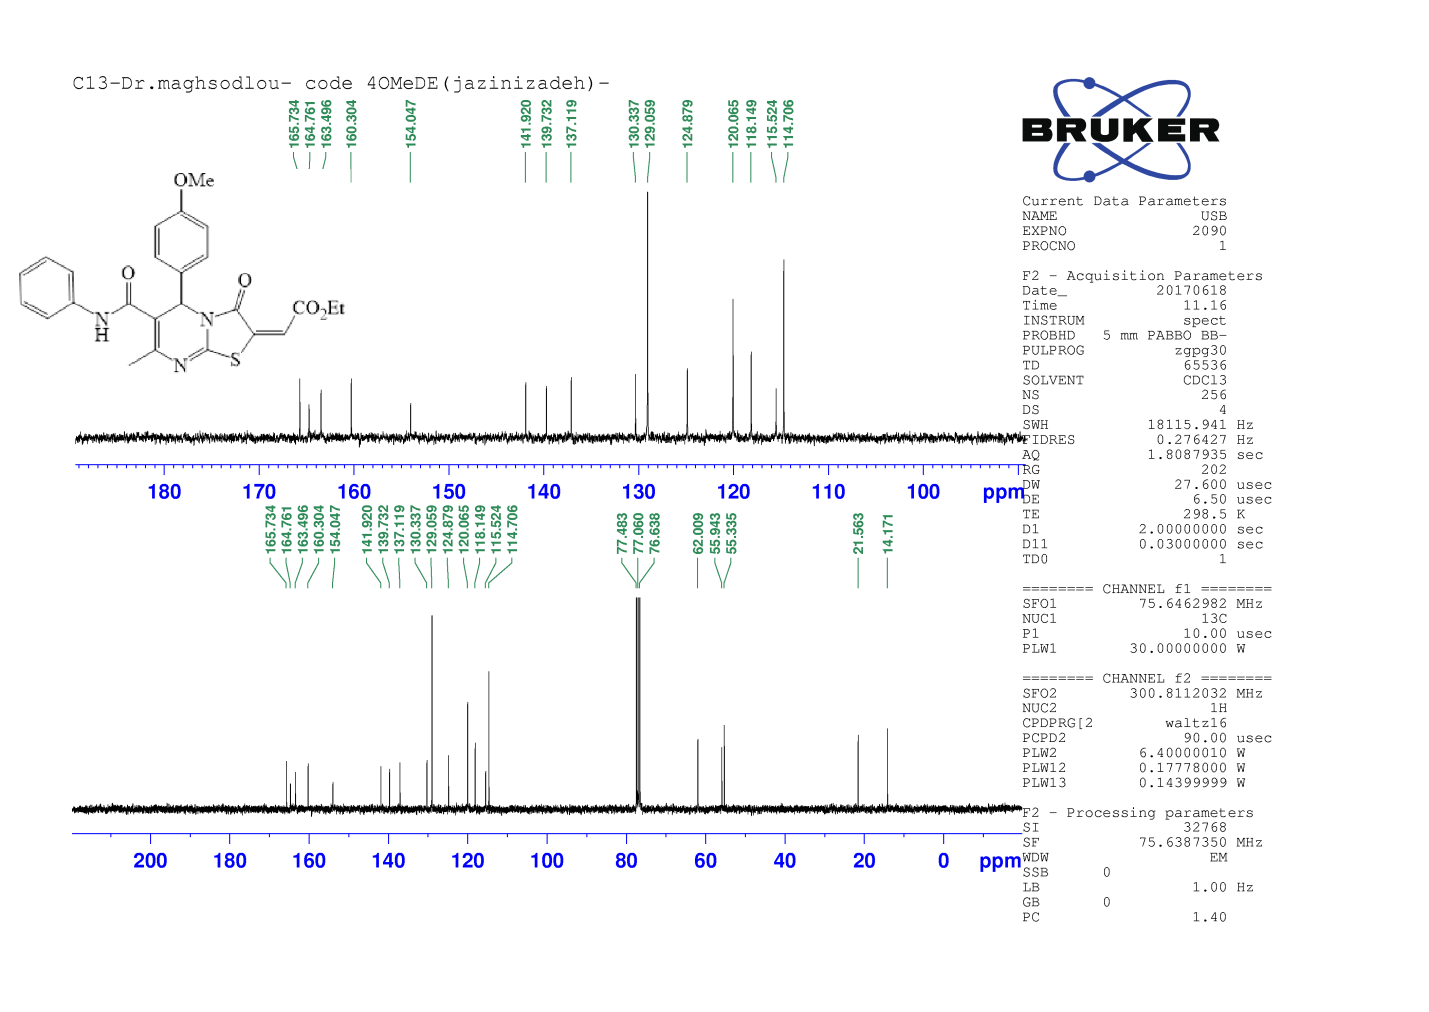


**Expanded****13C NMR spectra of compound 6j**


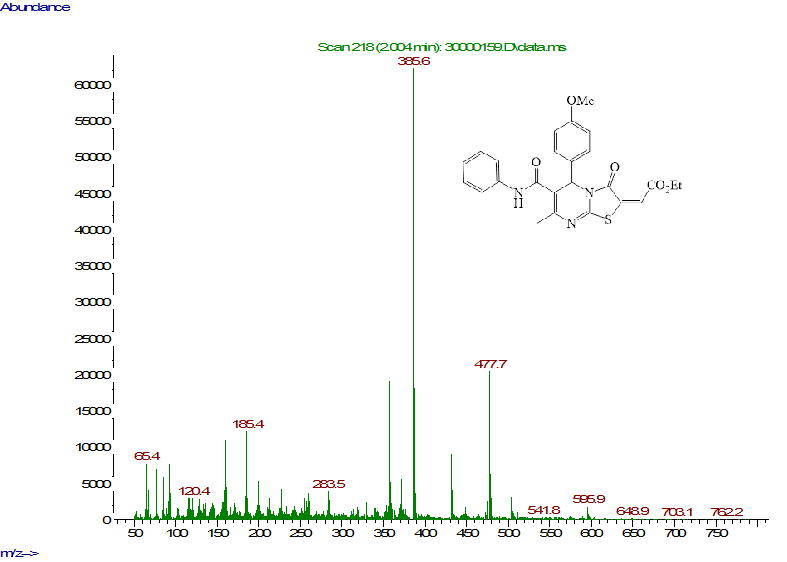


**Mass spectra of compound 6j**


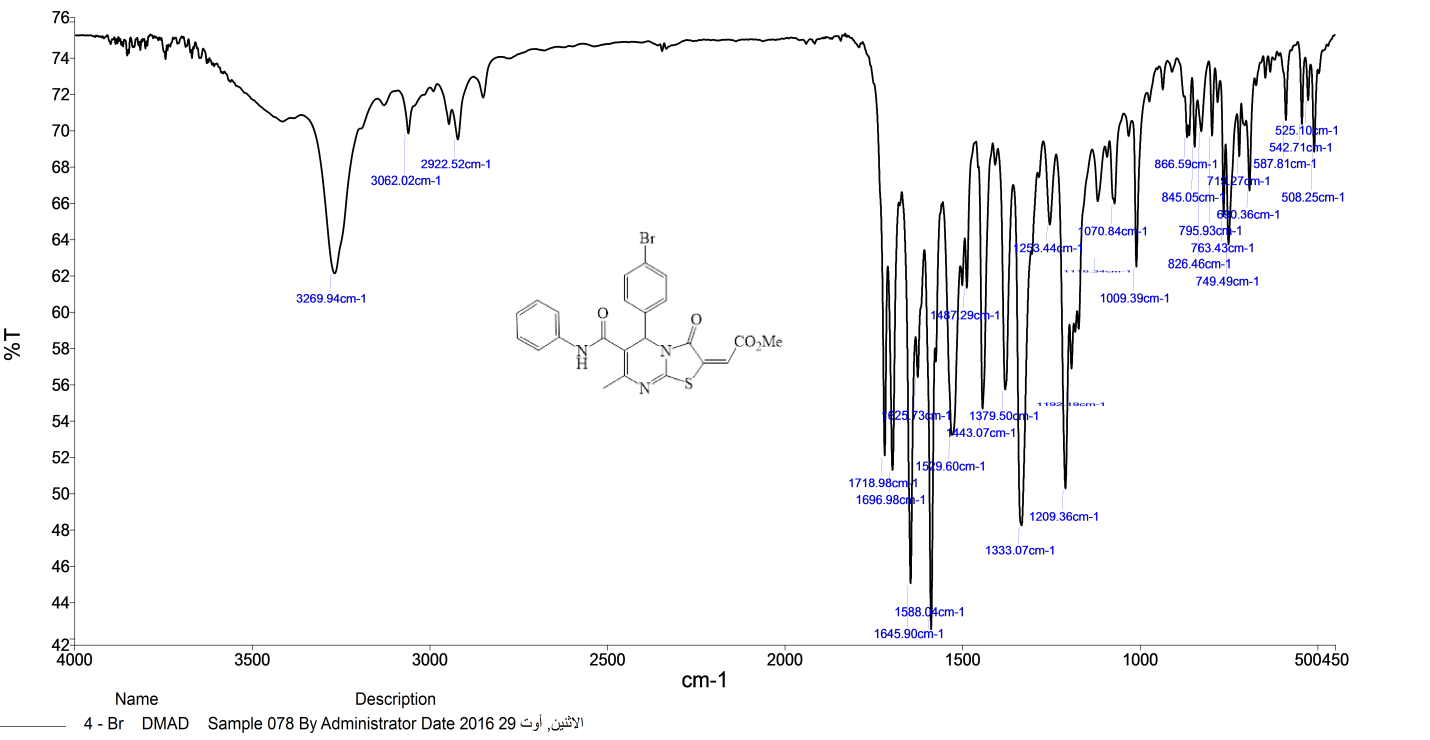


**FT-IR spectra of compound 6k**


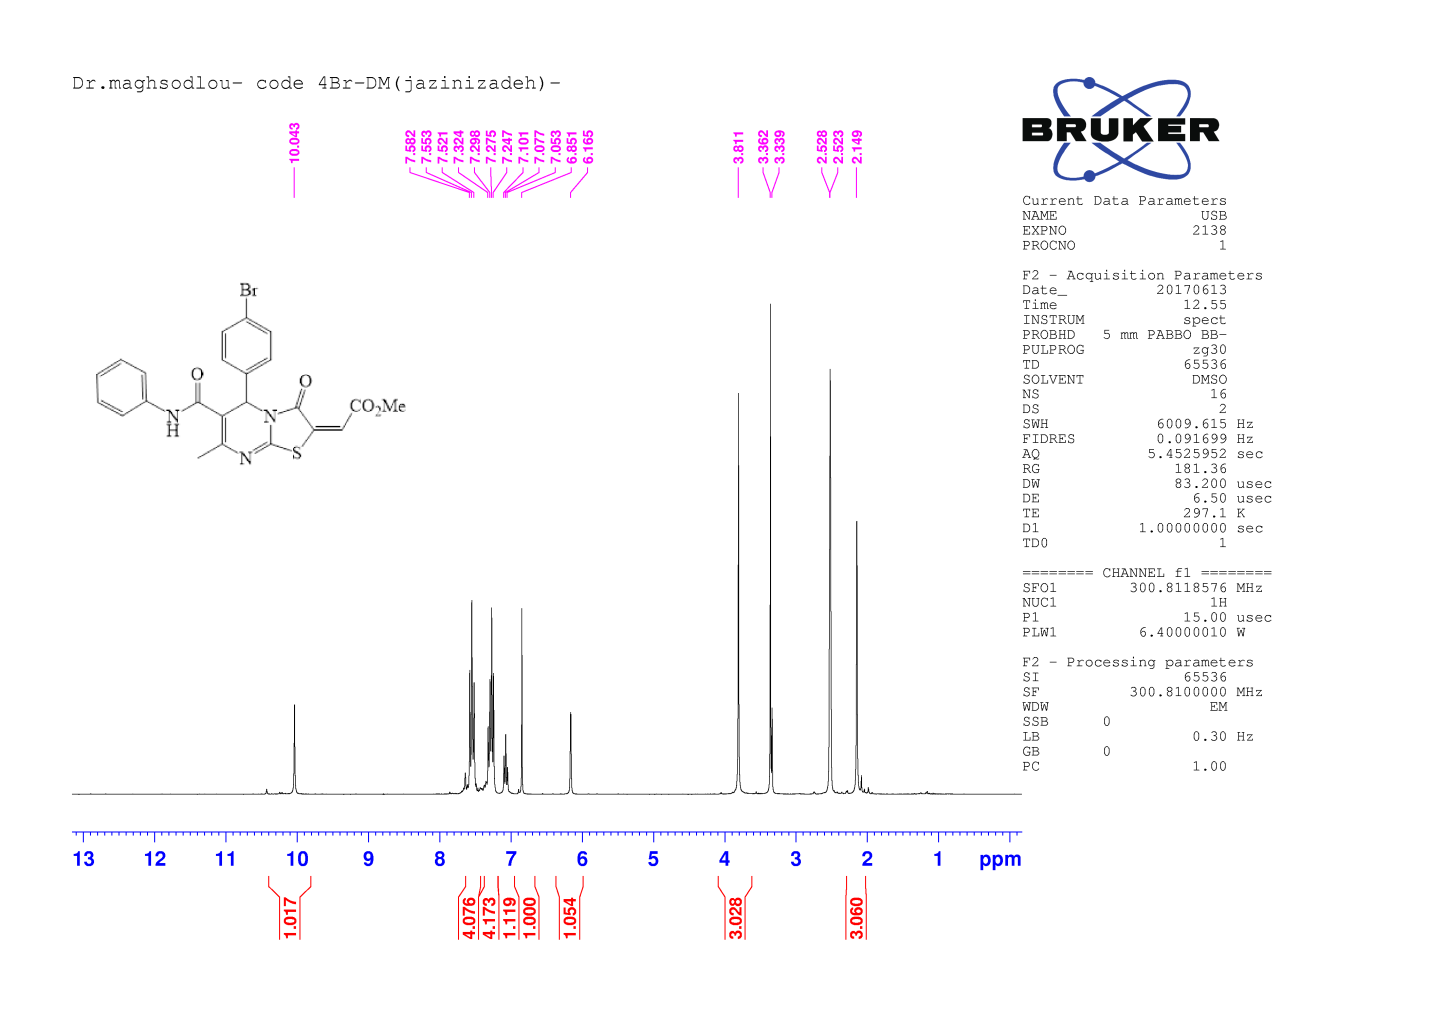


**1H NMR spectra of compound 6k**


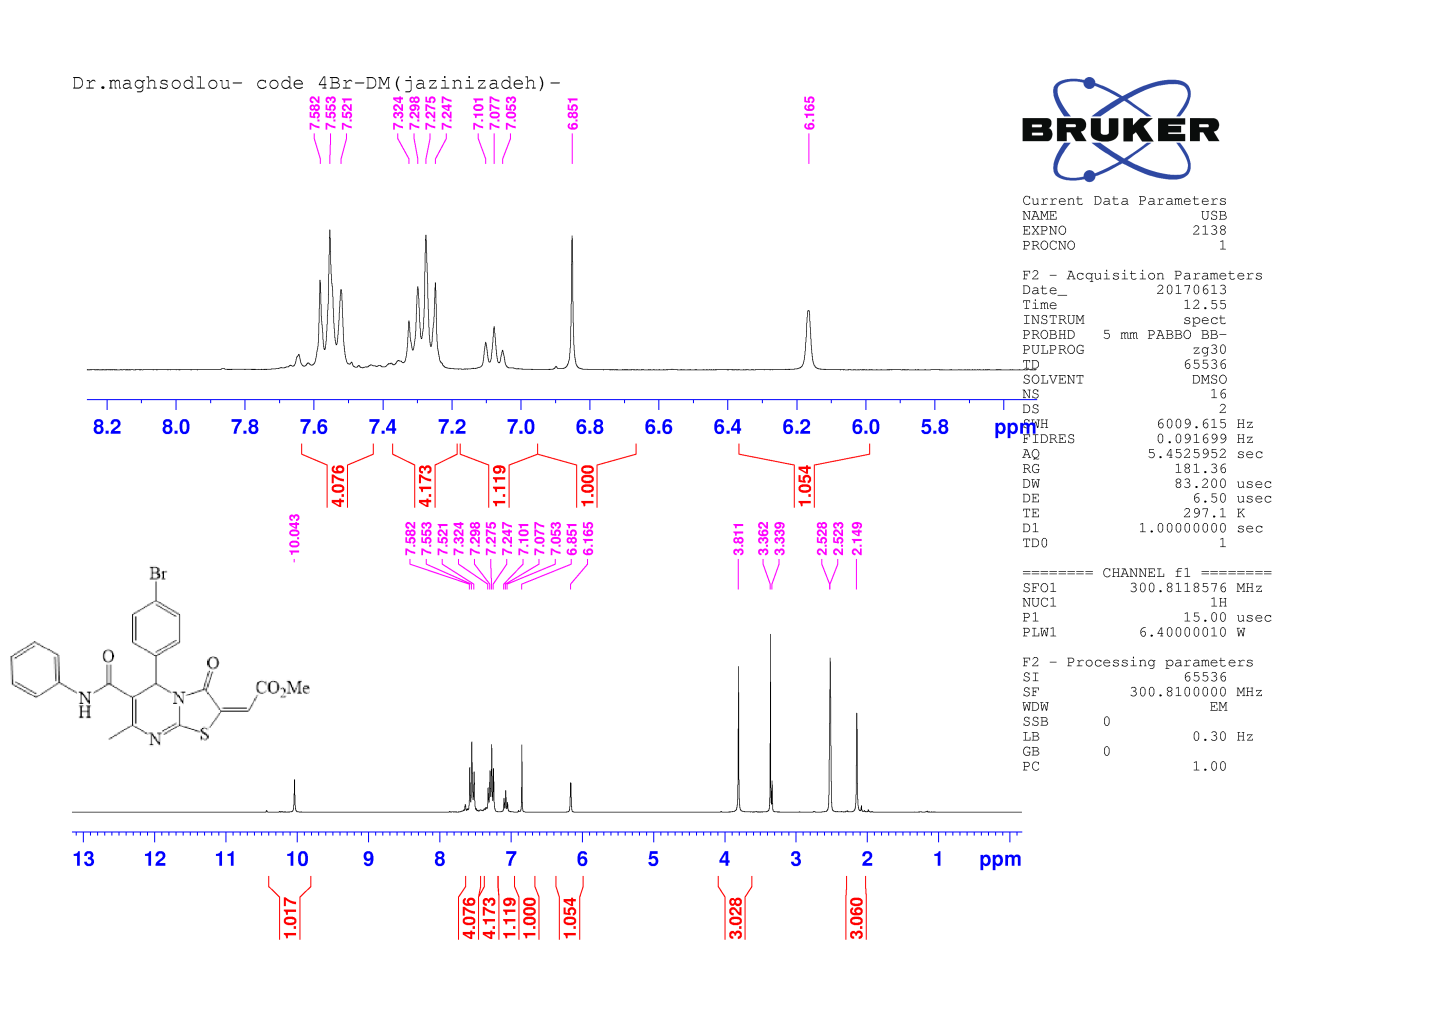


**Expanded****1H NMR spectra of compound 6k**


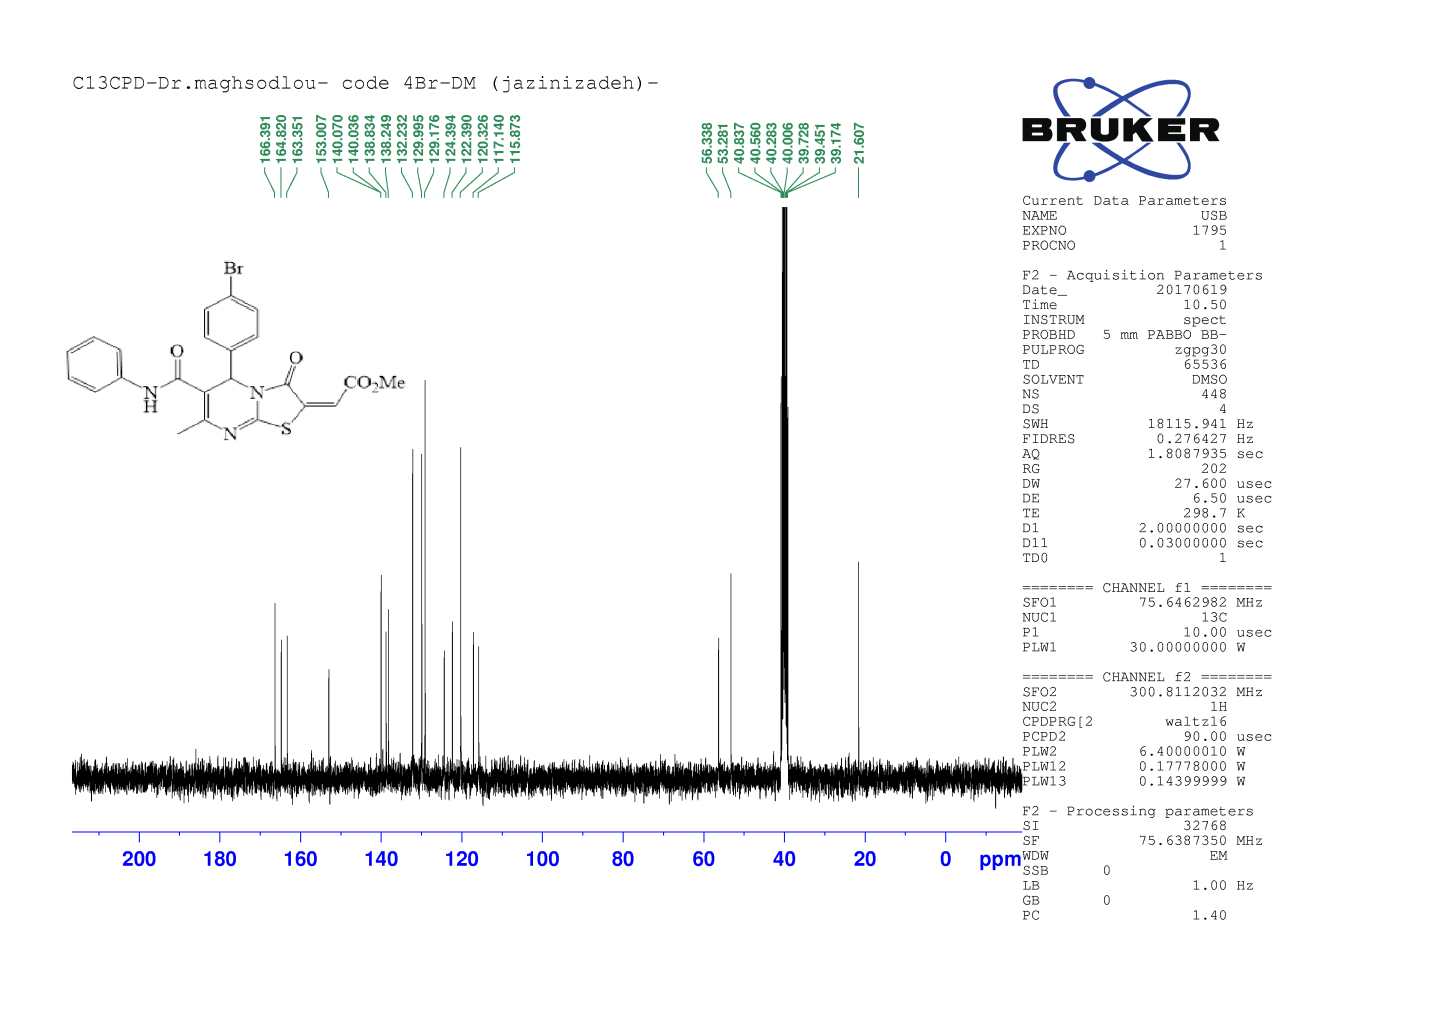


**13C NMR spectra of compound 6k**


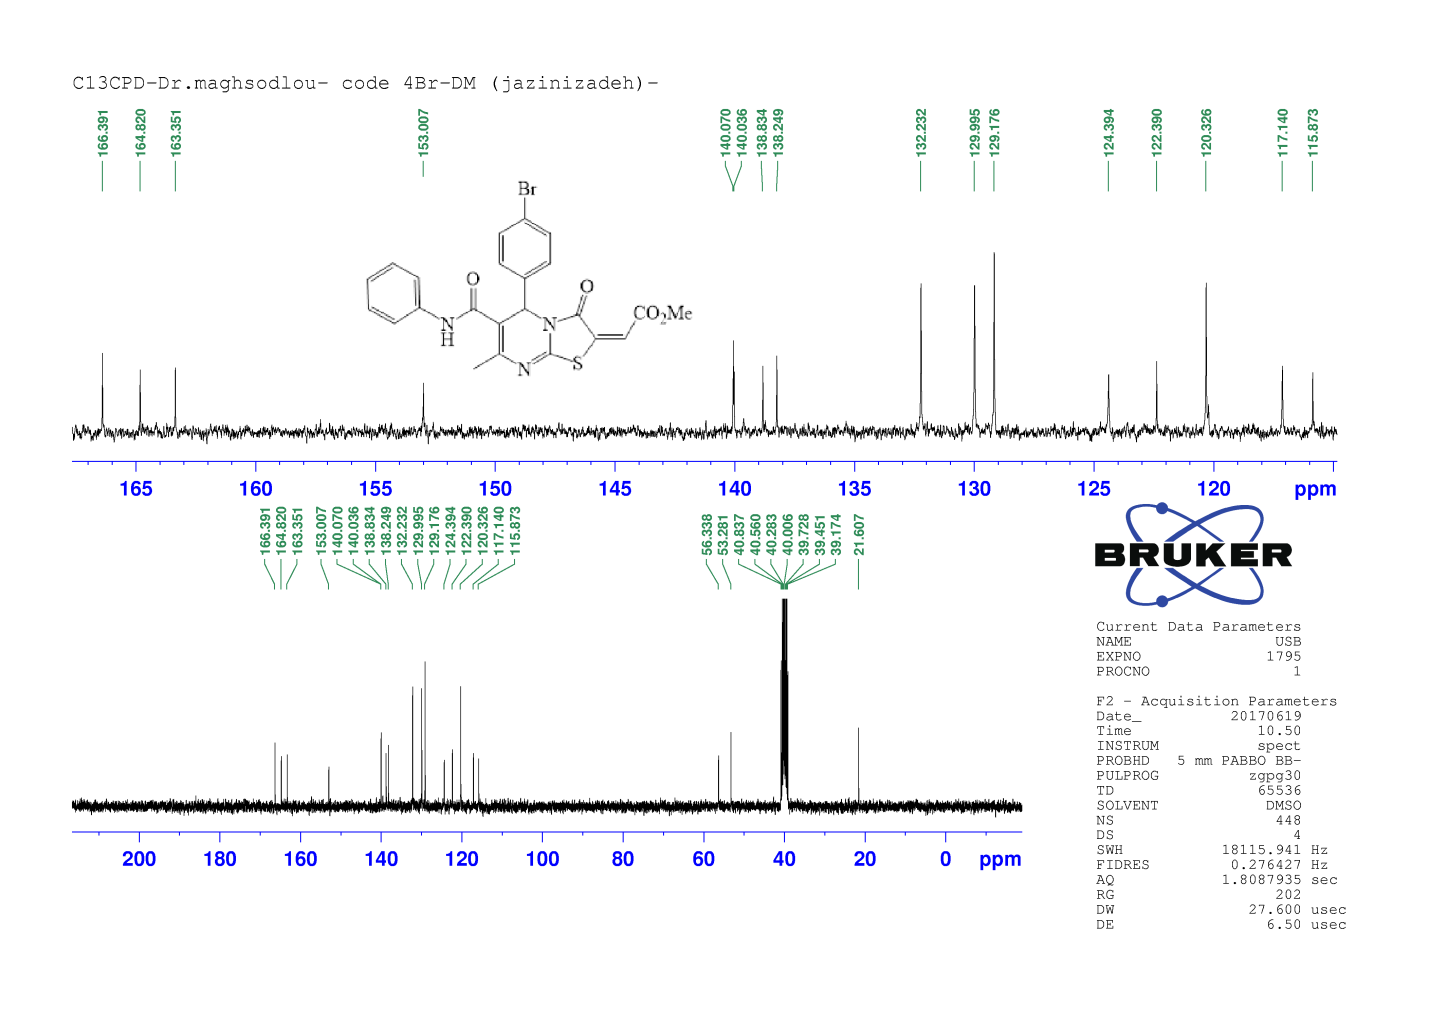


**Expanded****13C NMR spectra of compound 6k**


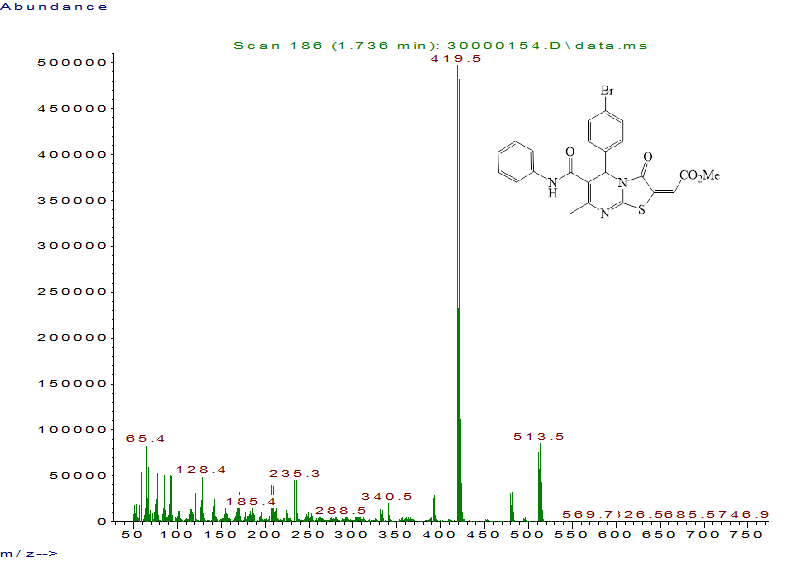


**Mass spectra of compound 6k**


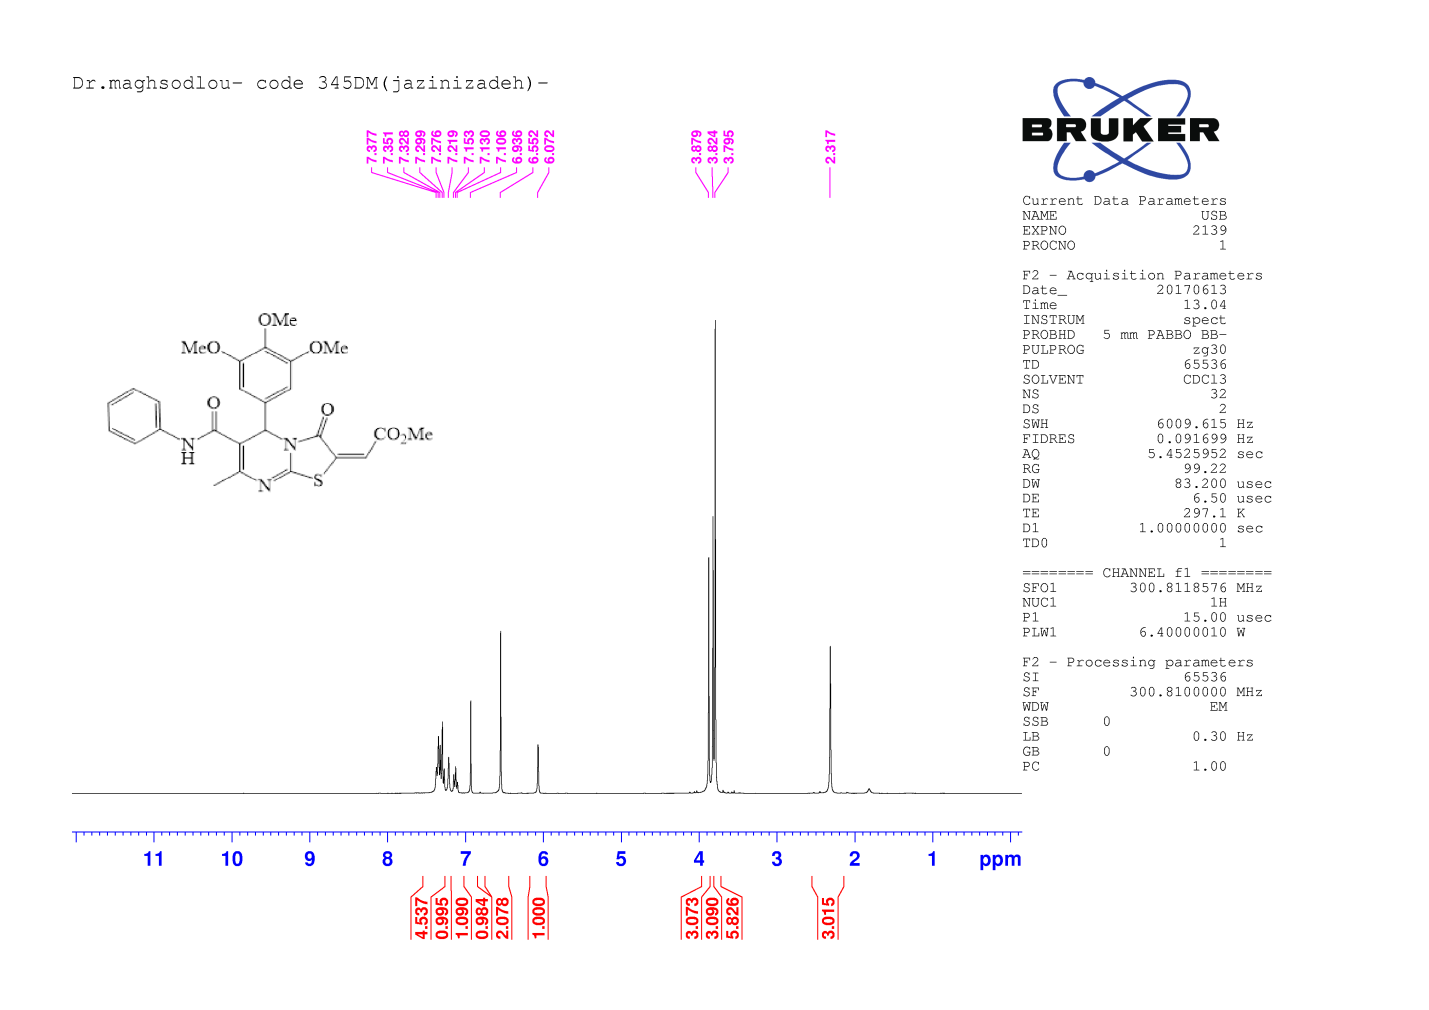


**1H NMR spectra of compound 6l**


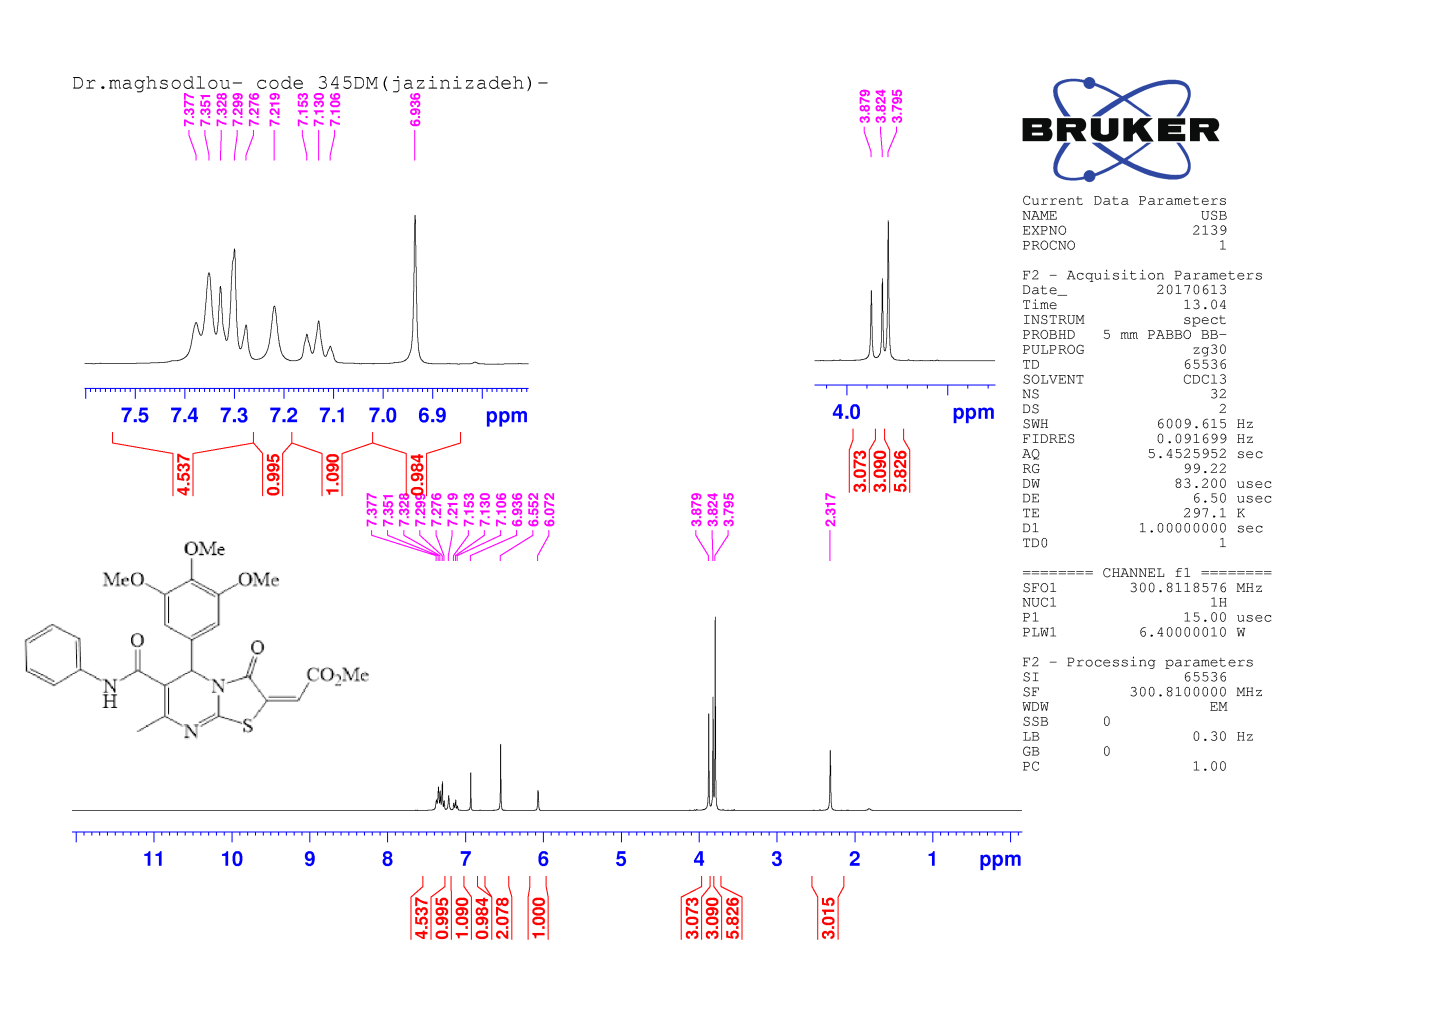


**Expanded****1H NMR spectra of compound 6l**


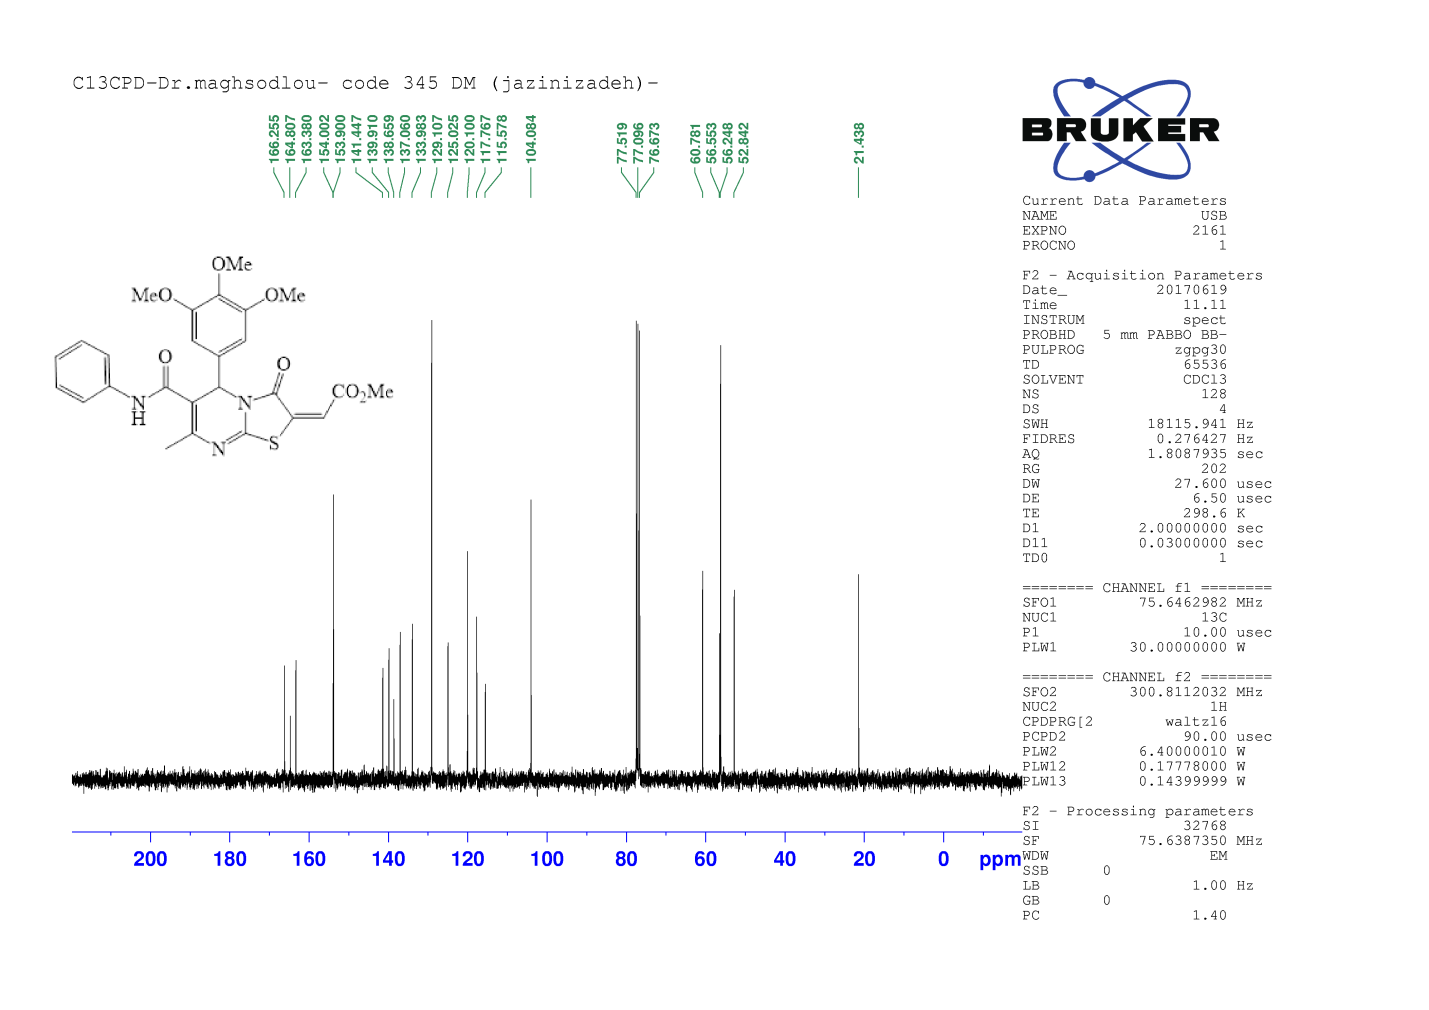


**13C NMR spectra of compound 6l**


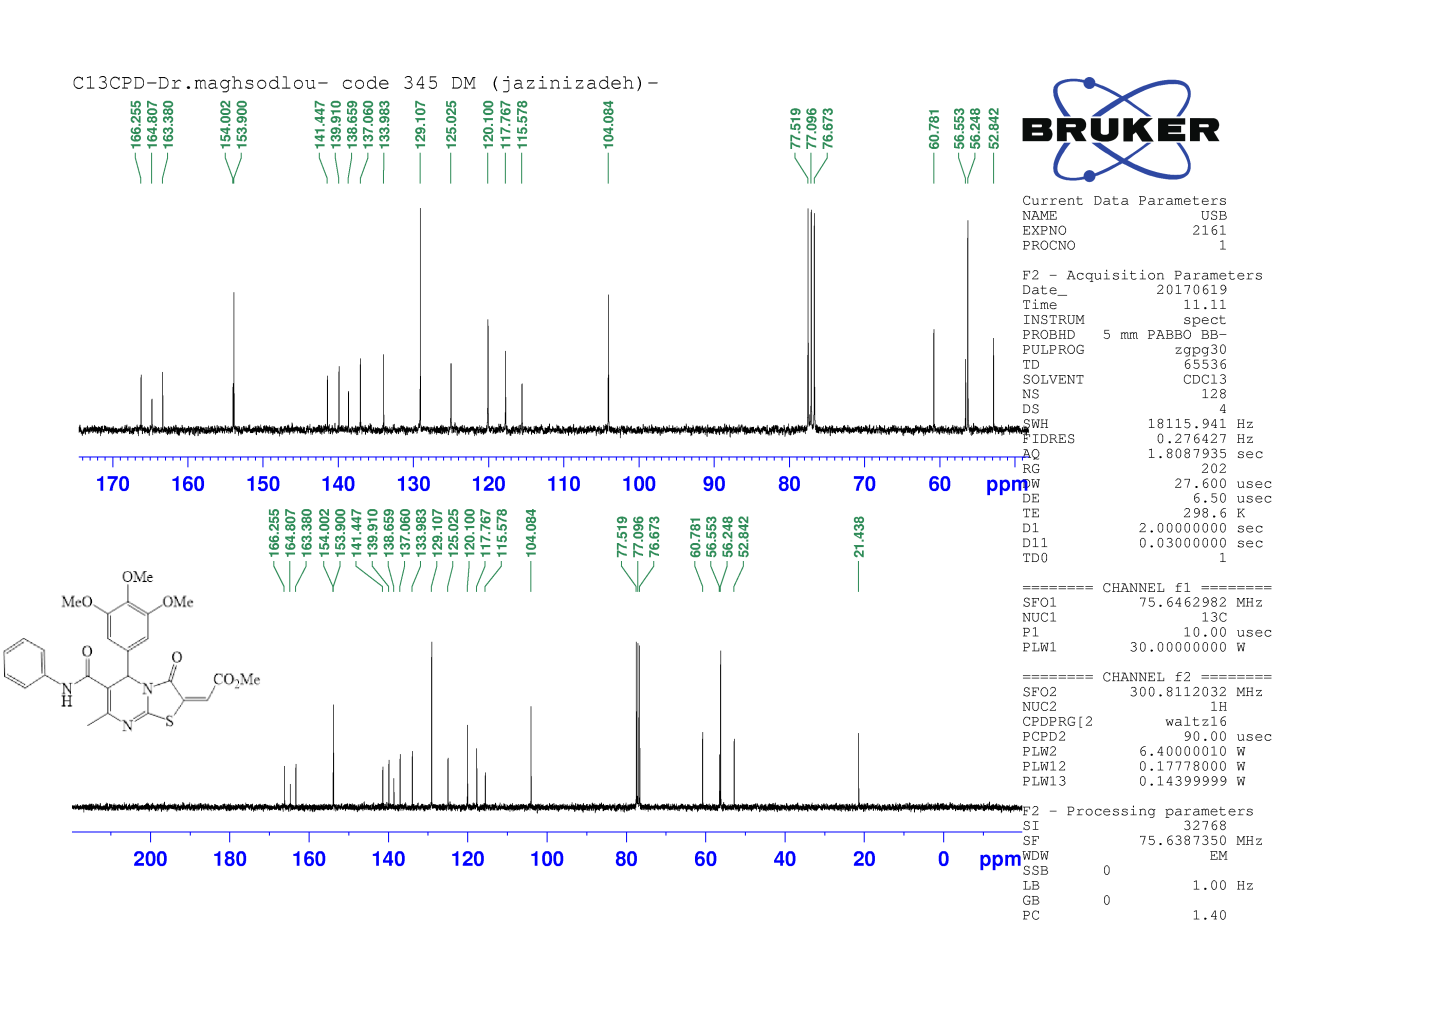


**Expanded****13C NMR spectra of compound 6l**


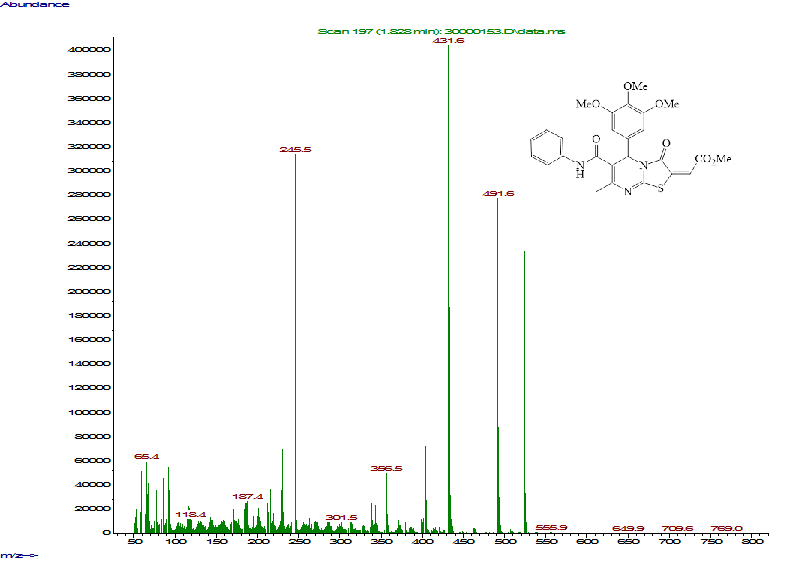


**Mass spectra of compound 6l**
